# Supplementary material for: Transcriptome Sequencing of Lima Bean (Phaseolus lunatus) to Identify Putative Positive Selection in Phaseolus and Legumes
Source: Int J Mol Sci. 2015 Jul 3;16(7):15172–87. doi: 10.3390/ijms160715172 (PMC4519893; doi:10.3390/ijms160715172)
Supplement: Supplementary file 1 [file ijms-16-15172-s001.xlsx]

## Sheet: Table S1
Quality controls of mRNA transcriptomes data
Samples	RawReads(MB)	RawBase(GB)	FilterReads(MB)	FilterBase(GB)	GC(%)	Q20(%)
Ala ck	62.31	6.23	60.32	5.63	47	98.46
ALA treatment	52.6	5.26	50.63	4.72	46	98.28
Insect ck	76.36	7.56	66.22	6.56	50	99.17
Insect treatment	57.26	5.4	53.48	5.04	50	99.44
Total	248.53	24.45	230.65	21.95	48.25	98.84

## Sheet: Table S2
Orthologous groups in red represent ω > 1 (positive selection).
OG ID	P.vulgaris	P. lunatus	Ka	Ks	ω	Function	GO Accession	GO Names
OG_23307	P.011G049500	T55730	0.0192622	0.00571059	3.37306	cold-regulated 413-plasma membrane 2	GO:0005773; GO:0009991; GO:0007154; GO:0006950; GO:0009628; GO:0009719	vacuole; response to extracellular stimulus; cell communication; response to stress; response to abiotic stimulus; response to endogenous stimulus
OG_22954	P.003G058300	T58440	0.0201437	0.00603293	3.33896	Expressed protein	GO:0005575; GO:0016043; GO:0006139; GO:0009056; GO:0016787; GO:0000166	cellular_component; cellular component organization; nucleobase-containing compound metabolic process; catabolic process; hydrolase activity; nucleotide binding
OG_22685	P.009G064900	T21210	0.0134987	0.00517628	2.6078	photosystem I light harvesting complex gene 5	GO:0016020; GO:0009579; GO:0005622; GO:0005488; GO:0006139; GO:0016043; GO:0009987; GO:0006091; GO:0015979; GO:0009536	membrane; thylakoid; intracellular; binding; nucleobase-containing compound metabolic process; cellular component organization; cellular process; generation of precursor metabolites and energy; photosynthesis; plastid
OG_23220	P.009G231100	T36159	0.0393994	0.020082	1.96193	Expressed protein
OG_23367	P.007G280100	T06676	0.0126707	0.00686627	1.84535	NAD(P)H dehydrogenase 18	GO:0006950; GO:0009058; GO:0009987; GO:0006629; GO:0016043; GO:0016020; GO:0009536; GO:0009579; GO:0019725; GO:0006810	response to stress; biosynthetic process; cellular process; lipid metabolic process; cellular component organization; membrane; plastid; thylakoid; cellular homeostasis; transport
OG_22891	P.002G201100	T34966	0.0219417	0.0131837	1.6643	polymerase delta 4	GO:0005634; GO:0006259; GO:0009058	nucleus; DNA metabolic process; biosynthetic process
OG_22648	P.001G213600	T06201	0.0359011	0.0233721	1.53606	WRKY DNA-binding protein 69	GO:0003677; GO:0003700; GO:0009058; GO:0006139; GO:0005622	DNA binding; sequence-specific DNA binding transcription factor activity; biosynthetic process; nucleobase-containing compound metabolic process; intracellular
OG_23443	P.002G067300	T44961	0.0177821	0.0124053	1.43342	homeobox protein 54	GO:0003677; GO:0000166; GO:0005515	DNA binding; nucleotide binding; protein binding
OG_23578	P.006G021300	T28309	0.0229841	0.0172994	1.32861	ankyrin repeat family protein	GO:0005515	protein binding
OG_23581	P.002G221700	T59158	0.0225017	0.0174262	1.29126	Expressed protein
OG_23276	P.011G003700	T10020	0.327421	0.260403	1.25736	Expressed protein
OG_23464	P.003G045300	T55494	0.0190676	0.0152012	1.25435	PsbQ-like 2	GO:0016020; GO:0009579; GO:0009536; GO:0006091; GO:0015979; GO:0005623; GO:0005488; GO:0005975; GO:0006139; GO:0009056; GO:0003674	membrane; thylakoid; plastid; generation of precursor metabolites and energy; photosynthesis; cell; binding; carbohydrate metabolic process; nucleobase-containing compound metabolic process; catabolic process; molecular_function
OG_23031	P.006G133800	T17683	0.0419058	0.0393742	1.0643	Seven transmembrane MLO family protein	GO:0006950; GO:0016020	response to stress; membrane
OG_23327	P.008G263400	T56300	0.0236856	0.0224347	1.05576	Expressed protein
OG_23093	P.006G072600	T56262	0.0418907	0.0399011	1.04986	Thioredoxin superfamily protein
OG_22637	P.001G194300	T15239	0.0253206	0.0255318	0.991728	Expressed protein	GO:0005975; GO:0006139; GO:0009056; GO:0016043; GO:0009058; GO:0009536; GO:0009987	carbohydrate metabolic process; nucleobase-containing compound metabolic process; catabolic process; cellular component organization; biosynthetic process; plastid; cellular process
OG_23159	P.002G330100	T14528	0.0395053	0.0403053	0.980153	Expressed protein
OG_23086	P.008G170300	T18818	0.0181131	0.0189289	0.956901	C2H2-like zinc finger protein	GO:0005488; GO:0003676; GO:0005622	binding; nucleic acid binding; intracellular
OG_23066	P.007G168600	T57342	0.0191523	0.0203448	0.941383	endoplasmic reticulum auxin binding protein 1	GO:0006259; GO:0009058; GO:0007049; GO:0008152; GO:0016043; GO:0009987; GO:0004872; GO:0005488; GO:0005783; GO:0003824; GO:0009653; GO:0016049; GO:0007165	DNA metabolic process; biosynthetic process; cell cycle; metabolic process; cellular component organization; cellular process; receptor activity; binding; endoplasmic reticulum; catalytic activity; anatomical structure morphogenesis; cell growth; signal transduction
OG_22983	P.005G092700	T41394	0.044837	0.0486074	0.922432	early nodulin-like protein 9	GO:0003674; GO:0005488	molecular_function; binding
OG_23527	P.010G158900	T12161	0.0670324	0.0737964	0.908343	S15/NS1, RNA-binding protein	GO:0005840; GO:0005198; GO:0006412	ribosome; structural molecule activity; translation
OG_23349	P.002G035100	T68971	0.047424	0.0525079	0.903179	Integrase-type DNA-binding superfamily protein	GO:0003700; GO:0009058; GO:0006139; GO:0003677	sequence-specific DNA binding transcription factor activity; biosynthetic process; nucleobase-containing compound metabolic process; DNA binding
OG_23588	P.010G159900	T08368	0.0182557	0.0202509	0.901477	Mitochondrial glycoprotein family protein	GO:0005739	mitochondrion
OG_23149	P.010G130100	T40120	0.0367957	0.0424468	0.866866	hydroxyproline-rich glycoprotein family protein
OG_23630	P.011G162300	T34491	0.021854	0.026054	0.838795	phosphoesterase	GO:0003677; GO:0005488	DNA binding; binding
OG_23213	P.001G262900	T31870	0.0481641	0.0579291	0.831433	Expressed protein	GO:0005622	intracellular
OG_23425	P.011G190700	T33278	0.0256864	0.0312944	0.820801	Expressed protein
OG_22806	P.007G147000	T40530	0.013183	0.0162702	0.810258	magnesium/proton exchanger	GO:0005215; GO:0006810; GO:0016020; GO:0005773; GO:0009987	transporter activity; transport; membrane; vacuole; cellular process
OG_22895	P.002G211500	T55943	0.0166697	0.0207137	0.804769	2-oxoglutarate (2OG) and Fe(II)-dependent oxygenase superfamily protein	GO:0003824; GO:0008152	catalytic activity; metabolic process
OG_22660	P.006G090100	T37635	0.0256415	0.0330592	0.775625	Heavy metal transport/detoxification superfamily protein	GO:0006810; GO:0005488	transport; binding
OG_23442	P.010G162600	T55054	0.0846708	0.110044	0.769427	Chaperone DnaJ-domain superfamily protein
OG_22664	P.006G094900	T07801	0.0124978	0.0162837	0.767505	Phosphoglycerate mutase family protein	GO:0003824; GO:0005515	catalytic activity; protein binding
OG_22686	P.009G065200	T22339	0.00871393	0.0116002	0.751186	Thioredoxin superfamily protein	GO:0009058; GO:0009987; GO:0003674; GO:0019725; GO:0008152; GO:0009536; GO:0003824	biosynthetic process; cellular process; molecular_function; cellular homeostasis; metabolic process; plastid; catalytic activity
OG_22681	P.009G036700	T09332	0.0283562	0.0381696	0.7429	P-loop containing nucleoside triphosphate hydrolases superfamily protein	GO:0003774; GO:0009987; GO:0005856	motor activity; cellular process; cytoskeleton
OG_22712	P.002G167300	T60051	0.0218467	0.0298625	0.731579	Ribosomal RNA adenine dimethylase family protein	GO:0006139; GO:0016740; GO:0005739	nucleobase-containing compound metabolic process; transferase activity; mitochondrion
OG_23005	P.009G175900	T16472	0.015394	0.0215296	0.715016	2-oxoglutarate (2OG) and Fe(II)-dependent oxygenase superfamily protein	GO:0003700; GO:0009058; GO:0006464; GO:0006139; GO:0005622	sequence-specific DNA binding transcription factor activity; biosynthetic process; cellular protein modification process; nucleobase-containing compound metabolic process; intracellular
OG_23357	P.001G228000	T07090	0.0116525	0.0163494	0.712714	Expressed protein
OG_22603	P.006G198100	T56836	0.014034	0.0197545	0.71042	proline iminopeptidase	GO:0005829; GO:0019538; GO:0009536; GO:0016787	cytosol; protein metabolic process; plastid; hydrolase activity
OG_23606	P.010G094000	T26913	0.0099992	0.0142338	0.702498	Expressed protein
OG_23098	P.008G152900	T38583	0.0408091	0.0581743	0.701498	nodulin MtN21 /EamA-like transporter family protein	GO:0016020; GO:0005215	membrane; transporter activity
OG_23324	P.005G113500	T21392	0.0240708	0.0350503	0.686749	cyclin p2;1	GO:0016301; GO:0009791; GO:0009987; GO:0006464; GO:0007049; GO:0005515; GO:0008152	kinase activity; post-embryonic development; cellular process; cellular protein modification process; cell cycle; protein binding; metabolic process
OG_23187	P.002G115200	T31457	0.0215462	0.0315092	0.683806	Polynucleotide adenylyltransferase family protein	GO:0016740; GO:0003723; GO:0006139	transferase activity; RNA binding; nucleobase-containing compound metabolic process
OG_23291	P.004G079500	T59283	0.0217087	0.0318473	0.68165	NDH-dependent cyclic electron flow 5	GO:0008150; GO:0005975; GO:0008152; GO:0003824; GO:0009987; GO:0030246	biological_process; carbohydrate metabolic process; metabolic process; catalytic activity; cellular process; carbohydrate binding
OG_23528	P.006G046000	T44378	0.0166952	0.0246262	0.677944	heat shock protein 21	GO:0006950	response to stress
OG_23585	P.008G013600	T58579	0.0574818	0.0852669	0.674139	RNA-binding (RRM/RBD/RNP motifs) family protein	GO:0003676; GO:0000166	nucleic acid binding; nucleotide binding
OG_23337	P.011G072700	T30204	0.028011	0.0416292	0.672869	Expressed protein	GO:0004518; GO:0006259; GO:0009056	nuclease activity; DNA metabolic process; catabolic process
OG_22857	P.007G076000	T37213	0.0112206	0.0167737	0.66894	F-box family protein	GO:0005515	protein binding
OG_22679	P.009G158700	T58602	0.0301488	0.0450916	0.668612	transferases, transferring glycosyl groups	GO:0016740	transferase activity
OG_22645	P.001G211300	T59629	0.0155012	0.0233618	0.663527	Expressed protein	GO:0019538; GO:0009987; GO:0009058; GO:0006139; GO:0009628; GO:0006629; GO:0006950	protein metabolic process; cellular process; biosynthetic process; nucleobase-containing compound metabolic process; response to abiotic stimulus; lipid metabolic process; response to stress
OG_23478	P.003G040400	T59044	0.0147108	0.0222129	0.662266	cytochrome B5 isoform A	GO:0005488; GO:0016020; GO:0009536	binding; membrane; plastid
OG_22763	P.005G158200	T07543	0.0237649	0.0359284	0.661453	SMAD/FHA domain-containing protein	GO:0005515	protein binding
OG_23323	P.005G112500	T17172	0.0190675	0.0292208	0.652531	basic helix-loop-helix (bHLH) DNA-binding superfamily protein	GO:0005515	protein binding
OG_22607	P.006G191200	T56788	0.0347431	0.0536258	0.64788	Protein of unknown function (DUF761)
OG_23364	P.011G040400	T49142	0.0258754	0.0405985	0.637349	RNA-binding CRS1 / YhbY (CRM) domain protein	GO:0003723	RNA binding
OG_23432	P.007G149700	T20879	0.0171103	0.027005	0.633599	TCP family transcription factor
OG_22998	P.001G136500	T68918	0.0267119	0.0426632	0.62611	Expressed protein
OG_22642	P.001G205900	T59315	0.0406706	0.0654045	0.621833	TSPO(outer membrane tryptophan-rich sensory protein)-related	GO:0005622; GO:0005737; GO:0016020	intracellular; cytoplasm; membrane
OG_23538	P.003G088000	T31090	0.0179238	0.0289267	0.61963	Adenine nucleotide alpha hydrolases-like superfamily protein	GO:0006950	response to stress
OG_23655	P.008G100000	T62265	0.0143533	0.0232054	0.618534	Expressed protein
OG_23233	P.002G053600	T44253	0.0362888	0.0590968	0.614057	Pseudouridine synthase family protein	GO:0003824; GO:0009987; GO:0009056; GO:0016787; GO:0003723; GO:0006139	catalytic activity; cellular process; catabolic process; hydrolase activity; RNA binding; nucleobase-containing compound metabolic process
OG_22646	P.001G212300	T07562	0.0283875	0.0462685	0.613538	Expressed protein
OG_23042	P.001G109000	T55455	0.0188308	0.0307838	0.61171	Expressed protein
OG_23137	P.008G291600	T44695	0.0182693	0.0300546	0.607869	Phosphoglycerate mutase family protein
OG_22755	P.005G139400	T52241	0.0241263	0.040051	0.602389	Polymerase/histidinol phosphatase-like	GO:0008150; GO:0004518; GO:0006139; GO:0005515	biological_process; nuclease activity; nucleobase-containing compound metabolic process; protein binding
OG_23056	P.001G113500	T67128	0.0241368	0.0400817	0.602192	HSP20-like chaperones superfamily protein
OG_22612	P.006G186200	T34750	0.0191503	0.0319085	0.600163	Tetratricopeptide repeat (TPR)-like superfamily protein	GO:0005515	protein binding
OG_23416	P.002G252200	T13609	0.0213251	0.0358567	0.594733	Ubiquitin carboxyl-terminal hydrolase family protein
OG_23096	P.001G041300	T41493	0.0173954	0.0294076	0.591529	Sas10/Utp3/C1D family
OG_22950	P.008G070500	T13347	0.00900903	0.0152753	0.589778	RING/U-box superfamily protein	GO:0005488; GO:0005515	binding; protein binding
OG_23330	P.011G052800	T31583	0.0102602	0.0179643	0.571145	RNA-binding (RRM/RBD/RNP motifs) family protein	GO:0003676; GO:0000166	nucleic acid binding; nucleotide binding
OG_22734	P.002G000400	T63369	0.0374468	0.0660833	0.56666	Expressed protein
OG_23015	P.008G241800	T58959	0.0172687	0.0305799	0.564708	Bromodomain transcription factor	GO:0005515	protein binding
OG_22727	P.002G010100	T33121	0.0241183	0.0431642	0.558756	Uncharacterized conserved protein (DUF2215)
OG_23473	P.001G028100	T59907	0.0345361	0.062779	0.550122	ZCF37
OG_23524	P.011G130500	T06596	0.0196718	0.0361946	0.5435	ATP synthase protein I -related	GO:0009058; GO:0005975; GO:0009987; GO:0008152	biosynthetic process; carbohydrate metabolic process; cellular process; metabolic process
OG_22766	P.005G170200	T44798	0.0217543	0.0408684	0.532302	NDH-dependent cyclic electron flow 1	GO:0009987; GO:0019748; GO:0008150; GO:0016020; GO:0003674; GO:0009058; GO:0005488; GO:0009536; GO:0008152; GO:0005975	cellular process; secondary metabolic process; biological_process; membrane; molecular_function; biosynthetic process; binding; plastid; metabolic process; carbohydrate metabolic process
OG_22852	P.007G091500	T21661	0.0190141	0.0365429	0.520322	Expressed protein	GO:0005739; GO:0006412; GO:0006139; GO:0016043; GO:0003824; GO:0000166; GO:0009536; GO:0005622; GO:0008152; GO:0009987	mitochondrion; translation; nucleobase-containing compound metabolic process; cellular component organization; catalytic activity; nucleotide binding; plastid; intracellular; metabolic process; cellular process
OG_23099	P.001G037700	T38264	0.0130167	0.02502	0.520252	Chalcone-flavanone isomerase family protein	GO:0003824	catalytic activity
OG_23391	P.008G233800	T28197	0.0117495	0.0226503	0.518735	myb domain protein 4	GO:0003700; GO:0003677; GO:0003682; GO:0009058; GO:0009987; GO:0019748; GO:0006139; GO:0005622	sequence-specific DNA binding transcription factor activity; DNA binding; chromatin binding; biosynthetic process; cellular process; secondary metabolic process; nucleobase-containing compound metabolic process; intracellular
OG_23179	P.007G252100	T38436	0.0108335	0.0209932	0.516051	HXXXD-type acyl-transferase family protein	GO:0016740; GO:0003824; GO:0005488; GO:0008152; GO:0009536	transferase activity; catalytic activity; binding; metabolic process; plastid
OG_23231	P.002G047800	T36455	0.0181817	0.0352484	0.515815	Glycoprotein membrane precursor GPI-anchored
OG_23620	P.008G118100	T26225	0.0220209	0.0428262	0.514192	Tetratricopeptide repeat (TPR)-like superfamily protein	GO:0005515	protein binding
OG_23498	P.011G177800	T53719	0.0173557	0.0337689	0.513956	transferases;folic acid binding
OG_22677	P.009G258000	T59070	0.0257086	0.0501337	0.512801	RNA-binding (RRM/RBD/RNP motifs) family protein	GO:0003676; GO:0009058; GO:0009987; GO:0006629; GO:0009536; GO:0000166	nucleic acid binding; biosynthetic process; cellular process; lipid metabolic process; plastid; nucleotide binding
OG_22798	P.003G156600	T57629	0.022028	0.0430147	0.512104	fatty acid desaturase 6	GO:0008152; GO:0009987; GO:0009058; GO:0006629; GO:0006464; GO:0009056; GO:0019748; GO:0016020; GO:0009536; GO:0003824; GO:0006139; GO:0006091; GO:0009628; GO:0015979	metabolic process; cellular process; biosynthetic process; lipid metabolic process; cellular protein modification process; catabolic process; secondary metabolic process; membrane; plastid; catalytic activity; nucleobase-containing compound metabolic process; generation of precursor metabolites and energy; response to abiotic stimulus; photosynthesis
OG_23490	P.008G016700	T46325	0.0203381	0.0400178	0.508226	catalytics;hydrolases	GO:0008152; GO:0016787	metabolic process; hydrolase activity
OG_22914	P.002G284900	T02340	0.0230377	0.0453928	0.507519	Domain of unknown function (DUF1767)	GO:0008150; GO:0000003	biological_process; reproduction
OG_23564	P.010G093000	T48172	0.0234313	0.0462882	0.506206	Pentatricopeptide repeat (PPR) superfamily protein	GO:0019538; GO:0016787; GO:0000166	protein metabolic process; hydrolase activity; nucleotide binding
OG_22639	P.001G201800	T59001	0.0197906	0.0395859	0.499941	NAD(P)-binding Rossmann-fold superfamily protein	GO:0008152; GO:0003824	metabolic process; catalytic activity
OG_23245	P.007G124100	T55835	0.0228551	0.0471976	0.484244	Plastid-lipid associated protein PAP / fibrillin family protein	GO:0009536; GO:0009605; GO:0006950; GO:0009607; GO:0009579; GO:0005886; GO:0016043; GO:0009987; GO:0005634; GO:0016020; GO:0005198	plastid; response to external stimulus; response to stress; response to biotic stimulus; thylakoid; plasma membrane; cellular component organization; cellular process; nucleus; membrane; structural molecule activity
OG_23555	P.010G122300	T34679	0.0362979	0.075306	0.482006	Expressed protein	GO:0016020; GO:0005773; GO:0009536; GO:0005739; GO:0000166	membrane; vacuole; plastid; mitochondrion; nucleotide binding
OG_23145	P.003G266300	T57520	0.0160644	0.0335198	0.47925	Expressed protein	GO:0006950; GO:0009536	response to stress; plastid
OG_23139	P.008G292900	T39854	0.0159241	0.0333999	0.476772	chloride channel E	GO:0006810; GO:0009987; GO:0005215; GO:0000166; GO:0009653; GO:0009791; GO:0016020; GO:0009536; GO:0009579; GO:0008152; GO:0003824	transport; cellular process; transporter activity; nucleotide binding; anatomical structure morphogenesis; post-embryonic development; membrane; plastid; thylakoid; metabolic process; catalytic activity
OG_23495	P.010G053300	T56167	0.0225188	0.0475779	0.473304	Phosphoglycerate mutase family protein	GO:0009536	plastid
OG_23577	P.011G192000	T43881	0.0201764	0.0426437	0.47314	SAC3/GANP/Nin1/mts3/eIF-3 p25 family	GO:0000003; GO:0009791; GO:0009628	reproduction; post-embryonic development; response to abiotic stimulus
OG_22963	P.002G100700	T12780	0.028126	0.0599085	0.469483	Protein of unknown function (DUF833)
OG_22848	P.009G159400	T58102	0.0178977	0.0381915	0.468631	FRIGIDA-like protein	GO:0007275	multicellular organismal development
OG_23412	P.011G065500	T60586	0.00950919	0.0204153	0.465787	dessication-induced 1VOC superfamily protein	GO:0003824; GO:0008152	catalytic activity; metabolic process
OG_23018	P.007G158100	T19751	0.039416	0.0854371	0.461346	Expressed protein
OG_23007	P.009G178500	T63743	0.0445452	0.0966683	0.460804	similar to RCD one 2	GO:0016740	transferase activity
OG_22822	P.007G200500	T06097	0.0197053	0.0431603	0.45656	Tetratricopeptide repeat (TPR)-like superfamily protein	GO:0005515	protein binding
OG_23514	P.010G085900	T51976	0.0182415	0.0399722	0.456354	AMP-dependent synthetase and ligase family protein	GO:0005488; GO:0007267; GO:0040029; GO:0006139; GO:0009605; GO:0006950; GO:0009607; GO:0000166; GO:0003824	binding; cell-cell signaling; regulation of gene expression, epigenetic; nucleobase-containing compound metabolic process; response to external stimulus; response to stress; response to biotic stimulus; nucleotide binding; catalytic activity
OG_23047	P.001G101900	T25683	0.0194074	0.0426619	0.45491	Sec14p-like phosphatidylinositol transfer family protein
OG_23346	P.002G162100	T47652	0.0144432	0.0318227	0.453864	Galactosyltransferase family protein	GO:0016740; GO:0005794; GO:0006464; GO:0009058; GO:0005975; GO:0016020; GO:0019538; GO:0009987	transferase activity; Golgi apparatus; cellular protein modification process; biosynthetic process; carbohydrate metabolic process; membrane; protein metabolic process; cellular process
OG_23562	P.007G271100	T45553	0.0242356	0.0541684	0.447412	Expressed protein
OG_22856	P.007G081000	T35787	0.00764332	0.0171087	0.446751	Basic-leucine zipper (bZIP) transcription factor family protein	GO:0003700; GO:0003677; GO:0005634; GO:0009058; GO:0006139; GO:0005622	sequence-specific DNA binding transcription factor activity; DNA binding; nucleus; biosynthetic process; nucleobase-containing compound metabolic process; intracellular
OG_23057	P.001G112000	T09277	0.030383	0.0680794	0.446288	Exostosin family protein
OG_23519	P.004G136600	T21368	0.0097214	0.0218615	0.44468	S-adenosyl-L-methionine-dependent methyltransferases superfamily protein
OG_22997	P.001G135900	T27927	0.0137847	0.0311561	0.44244	ARM repeat superfamily protein	GO:0005488	binding
OG_23196	P.001G053400	T40837	0.0218134	0.04984	0.437669	DNAse I-like superfamily protein
OG_23313	P.005G044100	T12570	0.0192867	0.0441317	0.437026	Acid phosphatase/vanadium-dependent haloperoxidase-related protein
OG_23062	P.001G100200	T27498	0.0122115	0.0280091	0.435982	NAC domain containing protein 47	GO:0007275; GO:0003700; GO:0003677; GO:0006810; GO:0009058; GO:0006139; GO:0005622	multicellular organismal development; sequence-specific DNA binding transcription factor activity; DNA binding; transport; biosynthetic process; nucleobase-containing compound metabolic process; intracellular
OG_23095	P.001G047200	T30285	0.01846	0.0429074	0.430229	aberrant lateral root formation 4
OG_22821	P.007G200900	T07642	0.0179761	0.042071	0.42728	Pseudouridine synthase family protein	GO:0003723; GO:0016787; GO:0006950; GO:0009987; GO:0019538; GO:0009628; GO:0000166; GO:0006139; GO:0003824; GO:0009056; GO:0006810; GO:0005215; GO:0016020; GO:0005975; GO:0006091	RNA binding; hydrolase activity; response to stress; cellular process; protein metabolic process; response to abiotic stimulus; nucleotide binding; nucleobase-containing compound metabolic process; catalytic activity; catabolic process; transport; transporter activity; membrane; carbohydrate metabolic process; generation of precursor metabolites and energy
OG_23602	P.002G315700	T56049	0.0311398	0.0737073	0.422479	Expressed protein
OG_23609	P.005G023200	T56583	0.0247859	0.0592591	0.418264	Uncharacterised protein family (UPF0114)	GO:0016020; GO:0009536	membrane; plastid
OG_22890	P.002G193700	T61362	0.0151477	0.0362843	0.417473	Cytochrome b561/ferric reductase transmembrane protein family	GO:0016020	membrane
OG_23225	P.002G042200	T53792	0.0469993	0.113473	0.414189	Alba DNA/RNA-binding protein	GO:0008150; GO:0003676; GO:0005886; GO:0005634	biological_process; nucleic acid binding; plasma membrane; nucleus
OG_22778	P.003G113400	T04951	0.0198207	0.0480015	0.412918	Haem oxygenase-like, multi-helical
OG_23388	P.003G253400	T17127	0.020287	0.0492127	0.412231	Putative methyltransferase family protein
OG_23627	P.007G274000	T58322	0.0158072	0.0387774	0.407639	NAD(P)-linked oxidoreductase superfamily protein	GO:0009536; GO:0003824; GO:0009058; GO:0009987; GO:0006629; GO:0008152; GO:0005975	plastid; catalytic activity; biosynthetic process; cellular process; lipid metabolic process; metabolic process; carbohydrate metabolic process
OG_23229	P.002G045500	T17370	0.0307829	0.0756824	0.406738	Ribosomal L18p/L5e family protein	GO:0005840; GO:0006412; GO:0005198	ribosome; translation; structural molecule activity
OG_23150	P.010G134400	T13361	0.0221334	0.0545299	0.405895	hydroxyproline-rich glycoprotein family protein
OG_23182	P.006G111900	T34165	0.0138237	0.0341	0.405389	Glycosyl hydrolase superfamily protein	GO:0016787; GO:0005975; GO:0009056; GO:0005488; GO:0005783; GO:0009987	hydrolase activity; carbohydrate metabolic process; catabolic process; binding; endoplasmic reticulum; cellular process
OG_23575	P.009G191500	T05264	0.00848934	0.0209757	0.404723	Mitochondrial substrate carrier family protein	GO:0016020; GO:0005739; GO:0006810; GO:0009987	membrane; mitochondrion; transport; cellular process
OG_22650	P.001G217100	T38411	0.0132342	0.032702	0.404691	Chaperone DnaJ-domain superfamily protein	GO:0019538; GO:0009987; GO:0000003; GO:0009791; GO:0009628; GO:0006950; GO:0005515	protein metabolic process; cellular process; reproduction; post-embryonic development; response to abiotic stimulus; response to stress; protein binding
OG_22973	P.003G168900	T39827	0.0152779	0.0384933	0.396896	Expressed protein	GO:0016043; GO:0006259; GO:0005488	cellular component organization; DNA metabolic process; binding
OG_23378	P.003G275800	T17863	0.0232623	0.0588351	0.395381	cycling DOF factor 1	GO:0003677; GO:0009058; GO:0006139	DNA binding; biosynthetic process; nucleobase-containing compound metabolic process
OG_22948	P.001G253000	T58259	0.0137423	0.0350568	0.392002	ARM repeat superfamily protein	GO:0005488	binding
OG_22879	P.009G024700	T58450	0.0192366	0.0493424	0.38986	unknown seed protein like 1
OG_22851	P.007G091900	T51531	0.0215813	0.0554299	0.389343	Pentatricopeptide repeat (PPR) superfamily protein	GO:0005515	protein binding
OG_23247	P.007G113200	T21289	0.00934681	0.0240527	0.388596	P-loop containing nucleoside triphosphate hydrolases superfamily protein	GO:0016787; GO:0000166	hydrolase activity; nucleotide binding
OG_23111	P.008G091600	T57559	0.0230073	0.0594657	0.3869	Disease resistance-responsive (dirigent-like protein) family protein	GO:0006950; GO:0009058; GO:0009987; GO:0019748	response to stress; biosynthetic process; cellular process; secondary metabolic process
OG_23266	P.008G160300	T57260	0.0155928	0.0403235	0.386692	Acyl-CoA N-acyltransferases (NAT) superfamily protein
OG_23051	P.001G107200	T42838	0.0173123	0.0449376	0.385252	alpha/beta-Hydrolases superfamily protein
OG_23465	P.003G046500	T60138	0.0148578	0.0387245	0.38368	Arabinanase/levansucrase/invertase
OG_23518	P.004G053400	T37613	0.0158682	0.0416265	0.381204	FAD-dependent oxidoreductase family protein	GO:0008152; GO:0003824	metabolic process; catalytic activity
OG_23009	P.006G009000	T07166	0.0142134	0.0374283	0.37975	Glyceraldehyde-3-phosphate dehydrogenase-like family protein	GO:0009058; GO:0009987; GO:0016301; GO:0008152; GO:0005829; GO:0000166; GO:0003824	biosynthetic process; cellular process; kinase activity; metabolic process; cytosol; nucleotide binding; catalytic activity
OG_23212	P.011G124800	T23074	0.0162627	0.0428686	0.379361	Tetratricopeptide repeat (TPR)-like superfamily protein	GO:0005515	protein binding
OG_22742	P.002G151400	T07443	0.025584	0.0683881	0.374101	Double Clp-N motif protein	GO:0016787; GO:0009058; GO:0009987; GO:0009536; GO:0019538; GO:0005515; GO:0000166; GO:0009056	hydrolase activity; biosynthetic process; cellular process; plastid; protein metabolic process; protein binding; nucleotide binding; catabolic process
OG_23235	P.002G054800	T22955	0.0178622	0.047838	0.37339	Expressed protein	GO:0005829	cytosol
OG_23154	P.008G200200	T48022	0.0248334	0.0670345	0.370458	GTP-binding protein, HflX	GO:0005737; GO:0000166	cytoplasm; nucleotide binding
OG_22777	P.003G096700	T58746	0.0239267	0.064711	0.369748	drought-induced 21	GO:0008150; GO:0006950	biological_process; response to stress
OG_22840	P.009G139000	T21169	0.0167708	0.0455826	0.367922	programmed cell death 2 C-terminal domain-containing protein	GO:0005737	cytoplasm
OG_23033	P.006G131200	T36825	0.0159708	0.0436887	0.365559	Expressed protein	GO:0009058; GO:0009987; GO:0016043	biosynthetic process; cellular process; cellular component organization
OG_22883	P.009G009900	T57309	0.0171278	0.0470147	0.364308	Glutathione S-transferase family protein	GO:0005739; GO:0019725; GO:0006810; GO:0016043; GO:0009987; GO:0003674; GO:0008150; GO:0009056; GO:0019748; GO:0003824; GO:0005515	mitochondrion; cellular homeostasis; transport; cellular component organization; cellular process; molecular_function; biological_process; catabolic process; secondary metabolic process; catalytic activity; protein binding
OG_23509	P.009G226100	T35937	0.0186551	0.0514356	0.362688	Protein of unknown function (DUF300)	GO:0016020; GO:0009056; GO:0009987; GO:0006629	membrane; catabolic process; cellular process; lipid metabolic process
OG_23130	P.008G284200	T40932	0.0230233	0.0635557	0.362254	phytochromobilin:ferredoxin oxidoreductase, chloroplast / phytochromobilin synthase (HY2)	GO:0005488; GO:0007165; GO:0003824; GO:0009058; GO:0009987; GO:0008152	binding; signal transduction; catalytic activity; biosynthetic process; cellular process; metabolic process
OG_22790	P.003G140100	T45335	0.012572	0.034731	0.361981	choline monooxygenase, putative (CMO-like)	GO:0016740; GO:0009058; GO:0009987; GO:0006629; GO:0019538	transferase activity; biosynthetic process; cellular process; lipid metabolic process; protein metabolic process
OG_23529	P.006G045700	T41765	0.0192002	0.0532486	0.360578	tetraacyldisaccharide 4\'-kinase family protein	GO:0009058; GO:0005975; GO:0009987; GO:0006629; GO:0016301; GO:0000166; GO:0008152	biosynthetic process; carbohydrate metabolic process; cellular process; lipid metabolic process; kinase activity; nucleotide binding; metabolic process
OG_22623	P.006G168100	T26517	0.0139358	0.0389047	0.358204	plastid transcriptionally active 12
OG_22962	P.002G100000	T58707	0.0186298	0.0520899	0.357647	Expressed protein	GO:0005739	mitochondrion
OG_23318	P.007G002100	T34294	0.0370614	0.104234	0.355561	Expressed protein	GO:0016787	hydrolase activity
OG_23004	P.009G175500	T32128	0.0128025	0.0361939	0.353719	D111/G-patch domain-containing protein	GO:0003676	nucleic acid binding
OG_23068	P.007G104500	T57871	0.0216984	0.0614169	0.353297	Expressed protein
OG_23284	P.005G075700	T51345	0.0135484	0.0384568	0.352302	Expressed protein	GO:0009058; GO:0009987; GO:0003824	biosynthetic process; cellular process; catalytic activity
OG_23405	P.011G138100	T36472	0.0174978	0.0496736	0.352256	Expressed protein
OG_22668	P.006G097900	T59108	0.0170894	0.0485487	0.352006	Expressed protein	GO:0005737; GO:0003723; GO:0006810; GO:0016043	cytoplasm; RNA binding; transport; cellular component organization
OG_23335	P.011G079200	T15163	0.0102825	0.0293237	0.350654	Expressed protein
OG_22858	P.001G077600	T67035	0.0316756	0.0905354	0.349869	Protein of unknown function (DUF677)
OG_23048	P.001G101700	T15876	0.0299295	0.0856863	0.349292	FAR1-related sequence 3
OG_22676	P.009G257200	T14278	0.0230392	0.066143	0.348325	Expressed protein
OG_23080	P.002G244600	T40298	0.0178325	0.0512554	0.347914	Tetratricopeptide repeat (TPR)-like superfamily protein	GO:0005622; GO:0006139; GO:0005515	intracellular; nucleobase-containing compound metabolic process; protein binding
OG_23427	P.008G137700	T05055	0.0162306	0.046705	0.347513	stomagen	GO:0009791; GO:0007267; GO:0007275; GO:0006139	post-embryonic development; cell-cell signaling; multicellular organismal development; nucleobase-containing compound metabolic process
OG_23206	P.011G021300	T10725	0.0328479	0.0949466	0.345962	Expressed protein
OG_22896	P.002G213300	T58039	0.011103	0.0321992	0.344822	nicotinamidase 1	GO:0016787; GO:0009058; GO:0006139; GO:0009719; GO:0008152; GO:0009987	hydrolase activity; biosynthetic process; nucleobase-containing compound metabolic process; response to endogenous stimulus; metabolic process; cellular process
OG_23308	P.011G052300	T54121	0.013401	0.0392611	0.34133	Expressed protein
OG_22598	P.006G211000	T71542	0.0271817	0.0799572	0.339953	HXXXD-type acyl-transferase family protein	GO:0016740	transferase activity
OG_23305	P.011G216700	T51245	0.0198569	0.0585156	0.339343	Expressed protein
OG_22996	P.001G135800	T16924	0.0151649	0.044815	0.338389	mitochondrial RNAediting factor 1	GO:0006139; GO:0005515	nucleobase-containing compound metabolic process; protein binding
OG_22673	P.006G110000	T30429	0.0220736	0.0656483	0.33624	Expressed protein
OG_22634	P.001G190500	T58789	0.0195625	0.0583222	0.335421	Expressed protein
OG_23580	P.006G049700	T17741	0.0291064	0.0877506	0.331694	MBOAT (membrane bound O-acyl transferase) family protein	GO:0016740	transferase activity
OG_23484	P.002G333700	T06579	0.0230073	0.0694737	0.331166	Expressed protein	GO:0009653; GO:0007275; GO:0030154; GO:0006139	anatomical structure morphogenesis; multicellular organismal development; cell differentiation; nucleobase-containing compound metabolic process
OG_23175	P.002G126800	T46816	0.00857149	0.0259955	0.329729	RECQ helicase L2	GO:0007049; GO:0005975; GO:0009987; GO:0006139; GO:0006259; GO:0006950; GO:0003676; GO:0009058; GO:0000166; GO:0005654; GO:0016787; GO:0005622	cell cycle; carbohydrate metabolic process; cellular process; nucleobase-containing compound metabolic process; DNA metabolic process; response to stress; nucleic acid binding; biosynthetic process; nucleotide binding; nucleoplasm; hydrolase activity; intracellular
OG_22616	P.006G180800	T57813	0.0147635	0.0448342	0.32929	Optic atrophy 3 protein (OPA3)
OG_23384	P.010G072300	T57913	0.0164645	0.0503071	0.32728	Expressed protein	GO:0016020; GO:0009536	membrane; plastid
OG_22899	P.007G014400	T57400	0.0158253	0.0484121	0.326888	cofactor of nitrate reductase and xanthine dehydrogenase 3	GO:0009058; GO:0019538; GO:0009987; GO:0005622; GO:0005737	biosynthetic process; protein metabolic process; cellular process; intracellular; cytoplasm
OG_23016	P.008G190100	T19415	0.0123609	0.0378315	0.326737	RING/U-box superfamily protein	GO:0009987; GO:0006629; GO:0005488; GO:0005515	cellular process; lipid metabolic process; binding; protein binding
OG_23181	P.002G122400	T68073	0.0146589	0.0450854	0.325135	decapping 5
OG_22825	P.007G181800	T39995	0.0167059	0.0514724	0.32456	RING/U-box superfamily protein	GO:0005515; GO:0005488	protein binding; binding
OG_22796	P.003G153500	T64905	0.0121671	0.0375364	0.324142	Expressed protein	GO:0016740	transferase activity
OG_23325	P.011G003500	T21586	0.0157886	0.0489001	0.322874	cobalt ion binding	GO:0005488; GO:0006950; GO:0006259; GO:0003677; GO:0005634	binding; response to stress; DNA metabolic process; DNA binding; nucleus
OG_23074	P.002G172100	T63019	0.00750871	0.0232713	0.322659	Immunoglobulin E-set superfamily protein	GO:0005737; GO:0030234	cytoplasm; enzyme regulator activity
OG_23113	P.008G084100	T61150	0.01885	0.0584966	0.32224	2-oxoglutarate (2OG) and Fe(II)-dependent oxygenase superfamily protein
OG_22930	P.002G310900	T29351	0.0184185	0.0572175	0.321903	S-adenosyl-L-methionine-dependent methyltransferases superfamily protein	GO:0009628; GO:0009791; GO:0006464; GO:0006139; GO:0007049; GO:0009058; GO:0005737; GO:0016740; GO:0016043	response to abiotic stimulus; post-embryonic development; cellular protein modification process; nucleobase-containing compound metabolic process; cell cycle; biosynthetic process; cytoplasm; transferase activity; cellular component organization
OG_23180	P.002G122800	T57125	0.00922569	0.0287642	0.320734	Uncharacterised protein family (UPF0114)	GO:0009536	plastid
OG_23559	P.006G040800	T21485	0.0133128	0.0416316	0.319777	fatty acid desaturase A	GO:0016020	membrane
OG_23517	P.002G222200	T30478	0.00854075	0.0267336	0.319476	Transducin/WD40 repeat-like superfamily protein	GO:0000166; GO:0005622; GO:0005515	nucleotide binding; intracellular; protein binding
OG_22970	P.003G163400	T14370	0.0106236	0.0338451	0.313889	Lactoylglutathione lyase / glyoxalase I family protein	GO:0003824	catalytic activity
OG_22785	P.009G108000	T56087	0.0182045	0.0581671	0.312969	heat stable protein 1	GO:0005829; GO:0006950; GO:0009628; GO:0009605; GO:0009607; GO:0009058; GO:0009987; GO:0006629; GO:0006810; GO:0016043; GO:0006091; GO:0005975; GO:0009056; GO:0008150; GO:0005886	cytosol; response to stress; response to abiotic stimulus; response to external stimulus; response to biotic stimulus; biosynthetic process; cellular process; lipid metabolic process; transport; cellular component organization; generation of precursor metabolites and energy; carbohydrate metabolic process; catabolic process; biological_process; plasma membrane
OG_23467	P.002G149700	T56733	0.0123436	0.0395037	0.312468	plant intracellular ras group-related LRR 3	GO:0016787; GO:0005515	hydrolase activity; protein binding
OG_22698	P.009G094400	T57832	0.0110997	0.0355903	0.311876	Expressed protein
OG_22832	P.009G137000	T17743	0.0131499	0.0422252	0.311422	cytokinin response factor 4	GO:0003700; GO:0003677; GO:0005634; GO:0009058; GO:0006139; GO:0005622	sequence-specific DNA binding transcription factor activity; DNA binding; nucleus; biosynthetic process; nucleobase-containing compound metabolic process; intracellular
OG_22609	P.006G188700	T19497	0.0145237	0.0467657	0.310564	disease resistance protein (TIR class), putative
OG_22952	P.002G228300	T06571	0.0119621	0.0386137	0.30979	thioredoxin family protein	GO:0016043; GO:0009987; GO:0003674; GO:0019725; GO:0006810; GO:0005829; GO:0008152; GO:0003824; GO:0006950; GO:0009628	cellular component organization; cellular process; molecular_function; cellular homeostasis; transport; cytosol; metabolic process; catalytic activity; response to stress; response to abiotic stimulus
OG_22817	P.007G207300	T58417	0.0246981	0.0798307	0.309382	Tetratricopeptide repeat (TPR)-like superfamily protein	GO:0005215; GO:0003824; GO:0006810; GO:0009536; GO:0006091; GO:0006139; GO:0009058; GO:0009987; GO:0005515	transporter activity; catalytic activity; transport; plastid; generation of precursor metabolites and energy; nucleobase-containing compound metabolic process; biosynthetic process; cellular process; protein binding
OG_22741	P.002G151200	T58683	0.162198	0.525698	0.308538	Cornichon family protein	GO:0007165; GO:0016020	signal transduction; membrane
OG_22826	P.007G182600	T57947	0.0140721	0.0458204	0.307115	Mitochondrial inner membrane translocase complex, subunit Tim44-related protein	GO:0005737; GO:0005622; GO:0005575	cytoplasm; intracellular; cellular_component
OG_22904	P.007G017200	T20381	0.0438355	0.142805	0.306961	pentatricopeptide (PPR) repeat-containing protein	GO:0009058	biosynthetic process
OG_23127	P.008G275400	T00367	0.0298853	0.0974383	0.30671	zinc finger protein-related
OG_23404	P.003G031200	T58078	0.0227077	0.0741898	0.306075	NAD(P)-binding Rossmann-fold superfamily protein	GO:0003824; GO:0008152; GO:0009987; GO:0005488; GO:0009058	catalytic activity; metabolic process; cellular process; binding; biosynthetic process
OG_22728	P.002G008100	T35814	0.0150706	0.0492999	0.305693	Expressed protein
OG_23223	P.010G039900	T07080	0.0153948	0.0504709	0.305023	copper ion transmembrane transporters
OG_22740	P.002G059800	T28647	0.0078816	0.0258543	0.304847	photolyase 1	GO:0006950; GO:0006259; GO:0003824; GO:0009628	response to stress; DNA metabolic process; catalytic activity; response to abiotic stimulus
OG_23170	P.004G024600	T59847	0.0303798	0.0999172	0.30405	Pathogenesis-related thaumatin superfamily protein	GO:0005975; GO:0009987	carbohydrate metabolic process; cellular process
OG_22988	P.005G116800	T55790	0.0237655	0.0785983	0.302366	hydroperoxide lyase 1	GO:0009058; GO:0009987; GO:0006629; GO:0008152; GO:0009536; GO:0003824; GO:0003674; GO:0009056; GO:0005488	biosynthetic process; cellular process; lipid metabolic process; metabolic process; plastid; catalytic activity; molecular_function; catabolic process; binding
OG_23270	P.001G254200	T05619	0.0160864	0.0534453	0.300988	Expressed protein
OG_23207	P.011G019300	T19749	0.0291177	0.0969138	0.300449	Polyketide cyclase/dehydrase and lipid transport superfamily protein	GO:0009607; GO:0006950	response to biotic stimulus; response to stress
OG_23103	P.001G034900	T41889	0.014846	0.0494193	0.300408	Protein of unknown function (DUF1230)	GO:0009056; GO:0009987	catabolic process; cellular process
OG_23616	P.005G033400	T58984	0.0174191	0.0584851	0.297838	high chlorophyll fluorescence 153
OG_23422	P.008G269800	T10200	0.0416359	0.141812	0.293598	RNAse THREE-like protein 2	GO:0006139; GO:0009056; GO:0003723; GO:0004518	nucleobase-containing compound metabolic process; catabolic process; RNA binding; nuclease activity
OG_22667	P.006G097600	T21389	0.0142505	0.0486023	0.293206	dsRNA-binding protein 2
OG_23169	P.004G029600	T15375	0.0105606	0.0360431	0.293001	SPX domain gene 4	GO:0006810	transport
OG_23433	P.010G049700	T27513	0.0141432	0.048351	0.292512	RWD domain-containing protein	GO:0000003; GO:0009791; GO:0009628; GO:0005488; GO:0005515	reproduction; post-embryonic development; response to abiotic stimulus; binding; protein binding
OG_23269	P.009G125300	T24946	0.0128718	0.0442349	0.290987	TRAM, LAG1 and CLN8 (TLC) lipid-sensing domain containing protein	GO:0005739; GO:0016020	mitochondrion; membrane
OG_23453	P.004G176400	T28136	0.0145269	0.050231	0.289202	RNA-dependent RNA polymerase family protein	GO:0016740	transferase activity
OG_23336	P.011G073100	T35139	0.0188217	0.0653456	0.288033	Tetratricopeptide repeat (TPR)-like superfamily protein
OG_22926	P.002G308600	T58529	0.0121893	0.0423422	0.287876	tRNA/rRNA methyltransferase (SpoU) family protein	GO:0003723; GO:0006139; GO:0009536; GO:0016740	RNA binding; nucleobase-containing compound metabolic process; plastid; transferase activity
OG_22764	P.002G162200	T47651	0.0236528	0.0822482	0.287578	Pentatricopeptide repeat (PPR) superfamily protein	GO:0005515	protein binding
OG_22649	P.001G214800	T56079	0.0109135	0.0379889	0.287282	NFU domain protein 1	GO:0005488; GO:0016043; GO:0009058; GO:0005198; GO:0009987	binding; cellular component organization; biosynthetic process; structural molecule activity; cellular process
OG_22870	P.007G054200	T22619	0.0157922	0.0550479	0.28688	alpha/beta-Hydrolases superfamily protein	GO:0008152; GO:0016787	metabolic process; hydrolase activity
OG_22687	P.009G067500	T08475	0.0189382	0.0660641	0.286664	Protein of unknown function (DUF3223)	GO:0005488; GO:0008152	binding; metabolic process
OG_23141	P.003G272100	T58510	0.0185797	0.0648213	0.28663	serine/threonine phosphatase 7	GO:0016787; GO:0006464; GO:0005623	hydrolase activity; cellular protein modification process; cell
OG_23322	P.011G107400	T11983	0.169704	0.593527	0.285925	Protein of unknown function (DUF1218)
OG_23607	P.005G021800	T66888	0.027071	0.09493	0.285168	Expressed protein
OG_23049	P.001G107600	T57412	0.0100124	0.0352761	0.283828	myb domain protein 60	GO:0009719; GO:0009628; GO:0008150; GO:0003682; GO:0003677	response to endogenous stimulus; response to abiotic stimulus; biological_process; chromatin binding; DNA binding
OG_23640	P.001G269000	T19848	0.0130364	0.0459961	0.283424	alpha/beta-Hydrolases superfamily protein	GO:0016787	hydrolase activity
OG_22849	P.007G093000	T33579	0.0118719	0.0420996	0.281996	Pseudouridine synthase family protein	GO:0003723; GO:0006139; GO:0003824	RNA binding; nucleobase-containing compound metabolic process; catalytic activity
OG_23521	P.004G117500	T42830	0.0136002	0.048297	0.281595	membrane-associated progesterone binding protein 3	GO:0005488; GO:0003824; GO:0008152	binding; catalytic activity; metabolic process
OG_23295	P.008G218400	T31291	0.00561518	0.0199426	0.281567	Expressed protein
OG_22894	P.002G209900	T67093	0.0183475	0.0652546	0.281169	metacaspase 1	GO:0016787; GO:0019538	hydrolase activity; protein metabolic process
OG_23275	P.003G222300	T42216	0.0153864	0.0552285	0.278595	Exostosin family protein	GO:0016020	membrane
OG_23368	P.007G280200	T57562	0.011376	0.0410001	0.277464	protein kinase family protein / peptidoglycan-binding LysM domain-containing protein	GO:0006464; GO:0000166; GO:0009056; GO:0009987; GO:0016301; GO:0008152	cellular protein modification process; nucleotide binding; catabolic process; cellular process; kinase activity; metabolic process
OG_23012	P.008G038800	T14636	0.010512	0.0379452	0.277031	Pentatricopeptide repeat (PPR) superfamily protein	GO:0005515	protein binding
OG_22842	P.009G150700	T56319	0.0100969	0.0365028	0.276605	ABC transporter family protein	GO:0006810; GO:0006139; GO:0009056; GO:0009536; GO:0000166; GO:0016787; GO:0005215; GO:0000003; GO:0009791; GO:0009790	transport; nucleobase-containing compound metabolic process; catabolic process; plastid; nucleotide binding; hydrolase activity; transporter activity; reproduction; post-embryonic development; embryo development
OG_22843	P.009G151100	T07465	0.0134933	0.0489392	0.275716	RmlC-like cupins superfamily protein	GO:0005576; GO:0016787; GO:0008152; GO:0003674; GO:0005488	extracellular region; hydrolase activity; metabolic process; molecular_function; binding
OG_23468	P.006G036100	T31960	0.014113	0.0512876	0.275174	Expressed protein	GO:0016020; GO:0005634; GO:0009058; GO:0006139	membrane; nucleus; biosynthetic process; nucleobase-containing compound metabolic process
OG_23177	P.002G126400	T58310	0.0102082	0.0371676	0.274653	Homeodomain-like superfamily protein	GO:0003700; GO:0003677; GO:0003682; GO:0005634; GO:0009058; GO:0006139; GO:0005622	sequence-specific DNA binding transcription factor activity; DNA binding; chromatin binding; nucleus; biosynthetic process; nucleobase-containing compound metabolic process; intracellular
OG_23289	P.010G060500	T42659	0.0102194	0.0372481	0.274361	Amino acid dehydrogenase family protein	GO:0009058; GO:0009987; GO:0003824; GO:0008152; GO:0000166	biosynthetic process; cellular process; catalytic activity; metabolic process; nucleotide binding
OG_23631	P.001G084900	T45484	0.0120687	0.0440414	0.27403	MALE GAMETOPHYTE DEFECTIVE 2	GO:0016020; GO:0005794; GO:0005768; GO:0009856; GO:0016043; GO:0009653; GO:0030154; GO:0016049; GO:0006464; GO:0009058; GO:0005975; GO:0009987; GO:0016740	membrane; Golgi apparatus; endosome; pollination; cellular component organization; anatomical structure morphogenesis; cell differentiation; cell growth; cellular protein modification process; biosynthetic process; carbohydrate metabolic process; cellular process; transferase activity
OG_22628	P.006G152000	T58735	0.00975299	0.0356605	0.273496	NAD(P)-binding Rossmann-fold superfamily protein	GO:0003824; GO:0016301; GO:0006464; GO:0000166; GO:0008152; GO:0009987; GO:0006629	catalytic activity; kinase activity; cellular protein modification process; nucleotide binding; metabolic process; cellular process; lipid metabolic process
OG_23445	P.002G080900	T05702	0.0145056	0.0532673	0.272317	Expressed protein
OG_23350	P.002G035200	T06920	0.0209879	0.0771819	0.271928	Rieske (2Fe-2S) domain-containing protein	GO:0009536; GO:0003824; GO:0005488; GO:0016020; GO:0009579; GO:0008152	plastid; catalytic activity; binding; membrane; thylakoid; metabolic process
OG_22804	P.003G082700	T56700	0.0147866	0.0546839	0.270401	indole-3-butyric acid response 1	GO:0008152; GO:0009653; GO:0030154; GO:0007275; GO:0016049; GO:0005777; GO:0003824; GO:0000166; GO:0009719; GO:0009987	metabolic process; anatomical structure morphogenesis; cell differentiation; multicellular organismal development; cell growth; peroxisome; catalytic activity; nucleotide binding; response to endogenous stimulus; cellular process
OG_22917	P.002G287800	T05176	0.0150747	0.0559204	0.269575	Protein of unknown function (DUF567)	GO:0008152; GO:0009987	metabolic process; cellular process
OG_23112	P.010G093200	T50051	0.0153972	0.0573115	0.268657	Pentatricopeptide repeat (PPR) superfamily protein	GO:0005488	binding
OG_22652	P.001G217900	T16406	0.0199992	0.074522	0.268366	HXXXD-type acyl-transferase family protein	GO:0016740; GO:0005737; GO:0009058; GO:0009987; GO:0006629; GO:0019538	transferase activity; cytoplasm; biosynthetic process; cellular process; lipid metabolic process; protein metabolic process
OG_23647	P.002G333300	T06466	0.0217012	0.080898	0.268254	Expressed protein
OG_22692	P.009G082000	T56643	0.0120935	0.0451464	0.267874	Expressed protein	GO:0016020; GO:0009536; GO:0009579; GO:0005515	membrane; plastid; thylakoid; protein binding
OG_23513	P.009G202900	T45930	0.0187913	0.0701623	0.267827	Mitochondrial transcription termination factor family protein	GO:0009058; GO:0006139; GO:0005739; GO:0003677	biosynthetic process; nucleobase-containing compound metabolic process; mitochondrion; DNA binding
OG_22663	P.006G093300	T41303	0.013118	0.049077	0.267295	cation exchanger 11	GO:0005215; GO:0005886; GO:0006810; GO:0009987; GO:0016020; GO:0005634	transporter activity; plasma membrane; transport; cellular process; membrane; nucleus
OG_23195	P.005G026300	T20448	0.174092	0.652572	0.266778	Lateral root primordium (LRP) protein-related
OG_22940	P.008G051900	T10758	0.016601	0.0622298	0.266768	Calcineurin-like metallo-phosphoesterase superfamily protein	GO:0016020; GO:0016787; GO:0006464; GO:0005623	membrane; hydrolase activity; cellular protein modification process; cell
OG_23610	P.002G167800	T27080	0.0130239	0.0490254	0.265656	Pentatricopeptide repeat (PPR) superfamily protein	GO:0005515	protein binding
OG_23258	P.008G221600	T40366	0.00800903	0.0301751	0.265418	Ankyrin repeat family protein	GO:0005198; GO:0005515	structural molecule activity; protein binding
OG_23285	P.003G094700	T22206	0.148948	0.564201	0.263998	BR enhanced expression 3	GO:0005515	protein binding
OG_23022	P.007G171700	T59300	0.00990309	0.03753	0.263872	Pentatricopeptide repeat (PPR) superfamily protein	GO:0006810; GO:0000003; GO:0030154; GO:0007275; GO:0005515	transport; reproduction; cell differentiation; multicellular organismal development; protein binding
OG_22980	P.005G085700	T54376	0.00895018	0.0341358	0.262194	DNA repair and meiosis protein (Mre11)	GO:0006139; GO:0000003; GO:0016043; GO:0007049; GO:0004518; GO:0005488; GO:0006950; GO:0006259; GO:0005622; GO:0005634; GO:0016787; GO:0006464; GO:0005623	nucleobase-containing compound metabolic process; reproduction; cellular component organization; cell cycle; nuclease activity; binding; response to stress; DNA metabolic process; intracellular; nucleus; hydrolase activity; cellular protein modification process; cell
OG_22986	P.005G121800	T14530	0.0105264	0.0402192	0.261725	NTM1-like 8	GO:0003677; GO:0009058; GO:0006139	DNA binding; biosynthetic process; nucleobase-containing compound metabolic process
OG_23614	P.003G256500	T34732	0.0121729	0.0465833	0.261316	cytochrome P450, family 722, subfamily A, polypeptide 1	GO:0005488; GO:0003824; GO:0003674; GO:0008152; GO:0019825	binding; catalytic activity; molecular_function; metabolic process; oxygen binding
OG_23020	P.001G147600	T57771	0.00678069	0.0260905	0.259891	ribosomal RNA processing 4	GO:0004518; GO:0005840; GO:0005198; GO:0003723; GO:0005622; GO:0007275; GO:0006412; GO:0008150	nuclease activity; ribosome; structural molecule activity; RNA binding; intracellular; multicellular organismal development; translation; biological_process
OG_23040	P.001G116900	T55958	0.0192134	0.0742933	0.258615	calmodulin (CAM)-binding protein of 25 kDa
OG_23268	P.009G125700	T71387	0.1463	0.566986	0.25803	RING/U-box superfamily protein	GO:0005488; GO:0005515	binding; protein binding
OG_23421	P.008G270000	T64611	0.0523006	0.202903	0.257762	Auxin-responsive family protein
OG_23399	P.003G219800	T56736	0.0119898	0.0467731	0.256339	Family of unknown function (DUF577)
OG_23395	P.010G122600	T31498	0.0150415	0.0592618	0.253815	RING/U-box superfamily protein	GO:0005488; GO:0005515	binding; protein binding
OG_23070	P.007G103600	T64260	0.402254	1.58637	0.253568	GDSL-like Lipase/Acylhydrolase superfamily protein	GO:0006629; GO:0016787	lipid metabolic process; hydrolase activity
OG_23481	P.001G010200	T39104	0.0371965	0.14716	0.252762	Expressed protein
OG_23228	P.002G045400	T57664	0.0133784	0.0535584	0.24979	2Fe-2S ferredoxin-like superfamily protein	GO:0003674; GO:0009058; GO:0009536; GO:0008152; GO:0009987; GO:0006091; GO:0005488; GO:0006139	molecular_function; biosynthetic process; plastid; metabolic process; cellular process; generation of precursor metabolites and energy; binding; nucleobase-containing compound metabolic process
OG_23625	P.009G206400	T15647	0.0106271	0.042571	0.249632	Protein of unknown function (DUF594)
OG_23650	P.005G036700	T06403	0.013571	0.0546444	0.248351	AGAMOUS-like 26	GO:0003700; GO:0003677; GO:0003723; GO:0005515; GO:0009058; GO:0009987; GO:0006629; GO:0006139; GO:0016740; GO:0005622	sequence-specific DNA binding transcription factor activity; DNA binding; RNA binding; protein binding; biosynthetic process; cellular process; lipid metabolic process; nucleobase-containing compound metabolic process; transferase activity; intracellular
OG_23185	P.009G210300	T43914	0.00481059	0.0195406	0.246185	Expressed protein	GO:0016787; GO:0000166; GO:0016740	hydrolase activity; nucleotide binding; transferase activity
OG_23595	P.005G075100	T13651	0.0167248	0.067976	0.24604	Tetratricopeptide repeat (TPR)-like superfamily protein
OG_23545	P.004G017900	T46539	0.0102959	0.0419304	0.245546	Tetratricopeptide repeat (TPR)-like superfamily protein
OG_22654	P.001G219400	T56606	0.00874636	0.0356325	0.245461	rotamase CYP 4	GO:0006464; GO:0019538; GO:0009987; GO:0003824; GO:0005515; GO:0009579; GO:0009536; GO:0016020; GO:0009058; GO:0016043	cellular protein modification process; protein metabolic process; cellular process; catalytic activity; protein binding; thylakoid; plastid; membrane; biosynthetic process; cellular component organization
OG_22694	P.009G084300	T21566	0.0097988	0.0401923	0.243798	sterile alpha motif (SAM) domain-containing protein	GO:0016043; GO:0007049; GO:0040029; GO:0006139; GO:0009058; GO:0016787; GO:0009628; GO:0009606; GO:0000003; GO:0005515	cellular component organization; cell cycle; regulation of gene expression, epigenetic; nucleobase-containing compound metabolic process; biosynthetic process; hydrolase activity; response to abiotic stimulus; tropism; reproduction; protein binding
OG_23303	P.005G057600	T56526	0.0148246	0.0610198	0.242948	SBP (S-ribonuclease binding protein) family protein	GO:0005515; GO:0005488	protein binding; binding
OG_23632	P.001G078600	T13806	0.0161545	0.0666902	0.242232	rhomboid-like protein 11	GO:0009987; GO:0006629; GO:0016787; GO:0005886; GO:0016020; GO:0019538; GO:0009536	cellular process; lipid metabolic process; hydrolase activity; plasma membrane; membrane; protein metabolic process; plastid
OG_23234	P.002G054200	T07635	0.0138014	0.0569899	0.242173	O-acyltransferase (WSD1-like) family protein	GO:0016740; GO:0009058; GO:0009987; GO:0006629; GO:0019538	transferase activity; biosynthetic process; cellular process; lipid metabolic process; protein metabolic process
OG_23054	P.001G105300	T39201	0.0171098	0.0708529	0.241484	Emsy N Terminus (ENT) domain-containing protein
OG_23217	P.002G137300	T46223	0.00830496	0.0344248	0.241249	Homeodomain-like superfamily protein	GO:0003677; GO:0003682; GO:0005622	DNA binding; chromatin binding; intracellular
OG_22754	P.005G138500	T49087	0.0147685	0.0612179	0.241245	hydrolase family protein / HAD-superfamily protein	GO:0005488; GO:0008152; GO:0016787; GO:0005739	binding; metabolic process; hydrolase activity; mitochondrion
OG_22739	P.002G061500	T19519	0.0146719	0.0608665	0.241051	Flavin-binding monooxygenase family protein	GO:0000166; GO:0003824; GO:0008152	nucleotide binding; catalytic activity; metabolic process
OG_23128	P.008G279400	T43096	0.00707378	0.0294173	0.240463	NOL1/NOP2/sun family protein / antitermination NusB domain-containing protein	GO:0016740; GO:0006139; GO:0003723; GO:0009058	transferase activity; nucleobase-containing compound metabolic process; RNA binding; biosynthetic process
OG_23569	P.005G039600	T26519	0.0126511	0.053027	0.238579	protein N-terminal asparagine amidohydrolase family protein	GO:0009058; GO:0006464; GO:0007165; GO:0009719; GO:0016787; GO:0008152; GO:0009987	biosynthetic process; cellular protein modification process; signal transduction; response to endogenous stimulus; hydrolase activity; metabolic process; cellular process
OG_22913	P.007G046800	T26996	0.0191715	0.0804822	0.238207	Expressed protein	GO:0005515; GO:0016020; GO:0009579; GO:0015979	protein binding; membrane; thylakoid; photosynthesis
OG_23333	P.003G055100	T05123	0.365402	1.53532	0.237997	Expressed protein	GO:0009536; GO:0008152; GO:0009628	plastid; metabolic process; response to abiotic stimulus
OG_22729	P.002G007200	T56426	0.0103345	0.0438094	0.235897	Peptidase M20/M25/M40 family protein	GO:0005829; GO:0016787; GO:0019538	cytosol; hydrolase activity; protein metabolic process
OG_23334	P.003G055400	T57791	0.012849	0.0548525	0.234246	DEA(D/H)-box RNA helicase family protein	GO:0003676; GO:0016787; GO:0009058; GO:0006139; GO:0000166; GO:0009536	nucleic acid binding; hydrolase activity; biosynthetic process; nucleobase-containing compound metabolic process; nucleotide binding; plastid
OG_22733	P.002G000500	T36898	0.0065291	0.0281221	0.23217	VEFS-Box of polycomb protein
OG_23615	P.003G257200	T26763	0.0162631	0.070212	0.231629	Expressed protein
OG_23526	P.002G059700	T61871	0.01996	0.0862549	0.231407	Putative thiol-disulphide oxidoreductase DCC
OG_22845	P.009G156600	T21163	0.0275982	0.119527	0.230894	plant U-box 22	GO:0016740; GO:0005622; GO:0006464; GO:0005488	transferase activity; intracellular; cellular protein modification process; binding
OG_23649	P.002G315200	T58105	0.00798262	0.0347966	0.229408	Peptidyl-tRNA hydrolase family protein	GO:0016787; GO:0009058; GO:0009987; GO:0009536; GO:0006412	hydrolase activity; biosynthetic process; cellular process; plastid; translation
OG_22810	P.007G216200	T59080	0.0222887	0.0973099	0.229048	Expressed protein
OG_23221	P.010G025900	T61553	0.00568232	0.0249216	0.228008	Mitochondrial transcription termination factor family protein	GO:0003677; GO:0005739; GO:0009058; GO:0006139	DNA binding; mitochondrion; biosynthetic process; nucleobase-containing compound metabolic process
OG_23274	P.003G221900	T14445	0.0116612	0.0511448	0.228003	Oxidoreductase family protein	GO:0008152; GO:0000166; GO:0003824; GO:0005975; GO:0009987	metabolic process; nucleotide binding; catalytic activity; carbohydrate metabolic process; cellular process
OG_22714	P.002G031000	T25978	0.0122978	0.0539607	0.227903	homeobox protein 33	GO:0003677	DNA binding
OG_23483	P.005G002000	T42963	0.0098825	0.0434875	0.227249	MUTL-homologue 1	GO:0007049; GO:0008152; GO:0009987; GO:0006259; GO:0009058; GO:0003677; GO:0000003; GO:0016043; GO:0006950; GO:0009791; GO:0009790; GO:0006139; GO:0005515; GO:0030154; GO:0007275; GO:0040029; GO:0005634; GO:0009719; GO:0000166; GO:0005622	cell cycle; metabolic process; cellular process; DNA metabolic process; biosynthetic process; DNA binding; reproduction; cellular component organization; response to stress; post-embryonic development; embryo development; nucleobase-containing compound metabolic process; protein binding; cell differentiation; multicellular organismal development; regulation of gene expression, epigenetic; nucleus…
OG_23050	P.001G107500	T42664	0.0145205	0.0641158	0.226473	cysteine synthase 26	GO:0009579; GO:0016740; GO:0009628; GO:0015979; GO:0009058; GO:0009987; GO:0009536; GO:0008152; GO:0005488; GO:0003824; GO:0005737	thylakoid; transferase activity; response to abiotic stimulus; photosynthesis; biosynthetic process; cellular process; plastid; metabolic process; binding; catalytic activity; cytoplasm
OG_20347	P.005G035600	T58449	0.0099334	0.0444237	0.223606	Plasma-membrane choline transporter family protein	GO:0009058; GO:0009987; GO:0016020	biosynthetic process; cellular process; membrane
OG_22713	P.002G031800	T58531	0.00901382	0.0403838	0.223204	Regulator of chromosome condensation (RCC1) family protein
OG_23023	P.007G170300	T57278	0.0145948	0.0654679	0.22293	Expressed protein	GO:0003676	nucleic acid binding
OG_22772	P.005G176800	T56038	0.0107437	0.0486374	0.220893	Putative thiol-disulphide oxidoreductase DCC	GO:0009536	plastid
OG_22991	P.001G121000	T43517	0.0126752	0.0575554	0.220225	Aldolase superfamily protein	GO:0003824; GO:0016740; GO:0009987; GO:0009056; GO:0008152	catalytic activity; transferase activity; cellular process; catabolic process; metabolic process
OG_23104	P.003G248000	T28630	0.00597744	0.0272352	0.219475	Expressed protein
OG_23601	P.002G316100	T06698	0.0149115	0.0680054	0.219269	B-box type zinc finger protein with CCT domain	GO:0005488; GO:0005622; GO:0005515	binding; intracellular; protein binding
OG_22653	P.001G218600	T35398	0.0224472	0.103289	0.217324	Chitinase family protein	GO:0016787; GO:0005975; GO:0009056; GO:0009987	hydrolase activity; carbohydrate metabolic process; catabolic process; cellular process
OG_23386	P.011G028900	T19817	0.00797799	0.0367562	0.217052	Metal-dependent phosphohydrolase	GO:0005488; GO:0008152; GO:0005634; GO:0016787	binding; metabolic process; nucleus; hydrolase activity
OG_22735	P.002G056200	T57910	0.0073745	0.0339989	0.216904	alpha/beta-Hydrolases superfamily protein	GO:0005829; GO:0005773; GO:0016787; GO:0006464; GO:0009056	cytosol; vacuole; hydrolase activity; cellular protein modification process; catabolic process
OG_23394	P.010G072800	T60629	0.0126748	0.0589209	0.215116	Expressed protein	GO:0005768; GO:0009987; GO:0005794; GO:0000003; GO:0016043; GO:0006259; GO:0007049; GO:0006139	endosome; cellular process; Golgi apparatus; reproduction; cellular component organization; DNA metabolic process; cell cycle; nucleobase-containing compound metabolic process
OG_23406	P.011G061000	T18021	0.0103097	0.0479272	0.215112	Tetratricopeptide repeat (TPR)-like superfamily protein	GO:0005515	protein binding
OG_22855	P.007G081100	T27723	0.00639286	0.029735	0.214995	Cupredoxin superfamily protein
OG_22853	P.007G091200	T58871	0.0162764	0.0761956	0.213614	RNA-binding (RRM/RBD/RNP motifs) family protein	GO:0003824; GO:0000166; GO:0003723	catalytic activity; nucleotide binding; RNA binding
OG_23118	P.008G079000	T40950	0.218533	1.02328	0.213562	Protein of unknown function (DUF1191)	GO:0016049; GO:0005886; GO:0009987; GO:0005975	cell growth; plasma membrane; cellular process; carbohydrate metabolic process
OG_22897	P.002G216600	T13833	0.00761235	0.0356814	0.213342	NAD(P)-linked oxidoreductase superfamily protein	GO:0003824; GO:0009058; GO:0005975; GO:0009987; GO:0005829; GO:0008152	catalytic activity; biosynthetic process; carbohydrate metabolic process; cellular process; cytosol; metabolic process
OG_23197	P.001G054000	T55541	0.00532296	0.0249876	0.213024	ATPase, F0/V0 complex, subunit C protein	GO:0006810; GO:0009987; GO:0005773; GO:0016020; GO:0005215	transport; cellular process; vacuole; membrane; transporter activity
OG_23359	P.008G235000	T36929	0.0120886	0.0567702	0.21294	cytochrome P450, family 716, subfamily A, polypeptide 1	GO:0005488; GO:0003674; GO:0008152; GO:0003824; GO:0009058; GO:0009987; GO:0006629	binding; molecular_function; metabolic process; catalytic activity; biosynthetic process; cellular process; lipid metabolic process
OG_23591	P.008G037200	T34716	0.00869742	0.0409255	0.212518	Biotin/lipoate A/B protein ligase family	GO:0005737; GO:0006464; GO:0003824	cytoplasm; cellular protein modification process; catalytic activity
OG_22886	P.009G146400	T08295	0.0144799	0.0681436	0.21249	Nucleotide-diphospho-sugar transferases superfamily protein	GO:0009058; GO:0005975; GO:0009987; GO:0009653; GO:0016043; GO:0007275; GO:0006464; GO:0016740; GO:0016020; GO:0005794; GO:0019538	biosynthetic process; carbohydrate metabolic process; cellular process; anatomical structure morphogenesis; cellular component organization; multicellular organismal development; cellular protein modification process; transferase activity; membrane; Golgi apparatus; protein metabolic process
OG_22731	P.002G001000	T20129	0.0112943	0.0534335	0.211372	Expressed protein
OG_22614	P.006G183800	T36866	0.0104893	0.049711	0.211005	protease-related	GO:0005777; GO:0019538; GO:0016787	peroxisome; protein metabolic process; hydrolase activity
OG_23656	P.009G176200	T58414	0.00989916	0.0469322	0.210925	Expressed protein
OG_22947	P.008G060000	T46897	0.0178382	0.084727	0.210538	fringe-related protein
OG_22812	P.007G214900	T59686	0.00765759	0.0363743	0.210522	Expressed protein
OG_23429	P.008G138200	T26404	0.0118331	0.0562885	0.210221	Regulator of chromosome condensation (RCC1) family protein	GO:0006139; GO:0005515; GO:0016043; GO:0009987; GO:0005739	nucleobase-containing compound metabolic process; protein binding; cellular component organization; cellular process; mitochondrion
OG_23188	P.003G240600	T54357	0.0109525	0.0521784	0.209905	small RNA degrading nuclease 3	GO:0003676; GO:0004518; GO:0000166	nucleic acid binding; nuclease activity; nucleotide binding
OG_23126	P.008G275200	T35138	0.0127278	0.0606861	0.209732	FRIGIDA like 1
OG_22847	P.009G154600	T57419	0.0101186	0.0483999	0.209063	farnesylcysteine lyase	GO:0006950; GO:0009056; GO:0009987; GO:0008152; GO:0019538; GO:0016020; GO:0005773; GO:0006629; GO:0003824; GO:0009719; GO:0007165	response to stress; catabolic process; cellular process; metabolic process; protein metabolic process; membrane; vacuole; lipid metabolic process; catalytic activity; response to endogenous stimulus; signal transduction
OG_23171	P.004G023900	T57415	0.0107071	0.0515301	0.207783	methyltransferases	GO:0006139; GO:0000003; GO:0009791; GO:0009790; GO:0016740; GO:0009605; GO:0006950; GO:0009607; GO:0016043; GO:0009058; GO:0009987; GO:0040029	nucleobase-containing compound metabolic process; reproduction; post-embryonic development; embryo development; transferase activity; response to external stimulus; response to stress; response to biotic stimulus; cellular component organization; biosynthetic process; cellular process; regulation of gene expression, epigenetic
OG_22977	P.003G098300	T20061	0.00844734	0.0406758	0.207675	tRNA/rRNA methyltransferase (SpoU) family protein	GO:0006139; GO:0016740; GO:0003723; GO:0006810; GO:0016043; GO:0009987; GO:0009056; GO:0006629	nucleobase-containing compound metabolic process; transferase activity; RNA binding; transport; cellular component organization; cellular process; catabolic process; lipid metabolic process
OG_23017	P.006G005300	T31499	0.00654059	0.0315777	0.207127	RNA-binding (RRM/RBD/RNP motifs) family protein	GO:0005622; GO:0000166; GO:0003723	intracellular; nucleotide binding; RNA binding
OG_23021	P.007G176700	T28729	0.0167322	0.0811166	0.206273	AUX/IAA transcriptional regulator family protein	GO:0006412; GO:0009058; GO:0006139; GO:0009536; GO:0005515; GO:0009719; GO:0007165; GO:0005634	translation; biosynthetic process; nucleobase-containing compound metabolic process; plastid; protein binding; response to endogenous stimulus; signal transduction; nucleus
OG_22600	P.006G201200	T55518	0.0160875	0.0781028	0.205979	Class I glutamine amidotransferase-like superfamily protein	GO:0008152; GO:0009987; GO:0016740	metabolic process; cellular process; transferase activity
OG_22911	P.007G035000	T30362	0.00796879	0.0388485	0.205125	FAD/NAD(P)-binding oxidoreductase	GO:0009536; GO:0003824; GO:0005488; GO:0009579; GO:0008152	plastid; catalytic activity; binding; thylakoid; metabolic process
OG_22834	P.009G137500	T30256	0.0127232	0.0623744	0.203981	WRKY family transcription factor	GO:0003677; GO:0003700; GO:0009058; GO:0006139; GO:0005622	DNA binding; sequence-specific DNA binding transcription factor activity; biosynthetic process; nucleobase-containing compound metabolic process; intracellular
OG_23211	P.011G018400	T41012	0.018908	0.0930346	0.203237	Expressed protein
OG_23077	P.002G241400	T57583	0.0196184	0.0966295	0.203027	glutathione S-transferase tau 7	GO:0016740; GO:0016301; GO:0006464; GO:0000166; GO:0016020; GO:0008152; GO:0009987; GO:0005515	transferase activity; kinase activity; cellular protein modification process; nucleotide binding; membrane; metabolic process; cellular process; protein binding
OG_23547	P.010G064400	T06531	0.0100987	0.049803	0.202773	Expressed protein
OG_23184	P.002G119800	T13869	0.0203538	0.100573	0.202378	Expressed protein
OG_22725	P.002G012100	T20888	0.00464253	0.0229578	0.20222	Expressed protein
OG_23299	P.001G242400	T27725	0.0106318	0.0528204	0.201282	Alpha/beta hydrolase related protein
OG_23003	P.009G175100	T48355	0.0131266	0.0656333	0.199999	Tetratricopeptide repeat (TPR)-like superfamily protein	GO:0005515	protein binding
OG_23664	P.004G146400	T41555	0.00626057	0.0314554	0.19903	Acyl-CoA N-acyltransferases (NAT) superfamily protein	GO:0016740; GO:0009058; GO:0019538; GO:0009987	transferase activity; biosynthetic process; protein metabolic process; cellular process
OG_23385	P.010G071600	T33636	0.00574213	0.0288997	0.198691	Polynucleotidyl transferase, ribonuclease H-like superfamily protein	GO:0005737; GO:0006950; GO:0006259; GO:0016787; GO:0003676	cytoplasm; response to stress; DNA metabolic process; hydrolase activity; nucleic acid binding
OG_23105	P.003G243700	T36289	0.00561941	0.0286327	0.196258	Remorin family protein
OG_22923	P.002G304600	T20687	0.0154822	0.0791207	0.195678	Pyridoxal phosphate phosphatase-related protein	GO:0016787; GO:0008152; GO:0009987	hydrolase activity; metabolic process; cellular process
OG_22803	P.003G082500	T56474	0.0208166	0.107528	0.193592	Phosphotyrosine protein phosphatases superfamily protein	GO:0006464; GO:0007165; GO:0016787; GO:0009605; GO:0006950; GO:0009607; GO:0008152; GO:0009987	cellular protein modification process; signal transduction; hydrolase activity; response to external stimulus; response to stress; response to biotic stimulus; metabolic process; cellular process
OG_22622	P.006G168200	T19529	0.00423943	0.0219212	0.193394	Protein of unknown function (DUF1000)
OG_23353	P.002G036500	T17006	0.0120895	0.0630363	0.191787	Pentatricopeptide repeat (PPR) superfamily protein	GO:0016787; GO:0016043; GO:0009058; GO:0009987; GO:0005975; GO:0008152; GO:0000003; GO:0009791; GO:0009790; GO:0005515	hydrolase activity; cellular component organization; biosynthetic process; cellular process; carbohydrate metabolic process; metabolic process; reproduction; post-embryonic development; embryo development; protein binding
OG_22602	P.006G200900	T47629	0.0300752	0.158516	0.18973	Protein of unknown function, DUF593
OG_23590	P.009G226400	T21363	0.00732033	0.0389336	0.188021	NagB/RpiA/CoA transferase-like superfamily protein	GO:0003824; GO:0009058; GO:0009987; GO:0006139; GO:0008152; GO:0005975; GO:0000166; GO:0008135; GO:0005575; GO:0005634; GO:0005737; GO:0005840; GO:0006412	catalytic activity; biosynthetic process; cellular process; nucleobase-containing compound metabolic process; metabolic process; carbohydrate metabolic process; nucleotide binding; translation factor activity, nucleic acid binding; cellular_component; nucleus; cytoplasm; ribosome; translation
OG_22902	P.007G015700	T59631	0.0138937	0.0739144	0.18797	Tetratricopeptide repeat (TPR)-like superfamily protein	GO:0005515	protein binding
OG_22757	P.005G149900	T39366	0.0278621	0.148401	0.187749	UDP-Glycosyltransferase superfamily protein	GO:0016740; GO:0008152	transferase activity; metabolic process
OG_22678	P.009G258200	T05356	0.00680939	0.036276	0.187711	Expressed protein	GO:0005515	protein binding
OG_23201	P.011G030900	T20739	0.00788762	0.0420952	0.187376	P-loop containing nucleoside triphosphate hydrolases superfamily protein	GO:0000166; GO:0006810	nucleotide binding; transport
OG_23249	P.001G166600	T56914	0.0086805	0.0464483	0.186885	Transducin/WD40 repeat-like superfamily protein	GO:0000003; GO:0009791; GO:0009628; GO:0005622; GO:0006810; GO:0016043; GO:0009987; GO:0009058; GO:0006464; GO:0000166; GO:0005515	reproduction; post-embryonic development; response to abiotic stimulus; intracellular; transport; cellular component organization; cellular process; biosynthetic process; cellular protein modification process; nucleotide binding; protein binding
OG_22964	P.002G101900	T40811	0.018511	0.0991453	0.186706	Asparagine synthase family protein	GO:0003824; GO:0009058; GO:0009987; GO:0008152	catalytic activity; biosynthetic process; cellular process; metabolic process
OG_23568	P.005G039800	T57785	0.0105021	0.056354	0.186359	Expressed protein	GO:0000003; GO:0009791; GO:0009628	reproduction; post-embryonic development; response to abiotic stimulus
OG_22871	P.002G317100	T58919	0.0298535	0.160339	0.186189	alpha/beta-Hydrolases superfamily protein	GO:0016787; GO:0016020; GO:0005783; GO:0009536; GO:0006810; GO:0009987; GO:0006629	hydrolase activity; membrane; endoplasmic reticulum; plastid; transport; cellular process; lipid metabolic process
OG_22711	P.005G099900	T52189	0.00950634	0.0510709	0.18614	FAD-linked oxidases family protein	GO:0000166; GO:0003824; GO:0008152; GO:0009987	nucleotide binding; catalytic activity; metabolic process; cellular process
OG_23148	P.010G129200	T04943	0.00834648	0.0449367	0.185739	Expressed protein
OG_23662	P.008G009400	T28637	0.00765386	0.0412134	0.185713	FKBP-like peptidyl-prolyl cis-trans isomerase family protein	GO:0019538; GO:0009987; GO:0009579; GO:0009536; GO:0006464; GO:0003824; GO:0016020	protein metabolic process; cellular process; thylakoid; plastid; cellular protein modification process; catalytic activity; membrane
OG_23576	P.010G007300	T58027	0.0100851	0.0543484	0.185564	3-phosphoserine phosphatase	GO:0008152; GO:0009987; GO:0016787; GO:0009058	metabolic process; cellular process; hydrolase activity; biosynthetic process
OG_23025	P.007G169400	T19977	0.00531631	0.0286677	0.185446	pale cress protein (PAC)	GO:0009536; GO:0009653; GO:0007275; GO:0009058; GO:0009987; GO:0006629; GO:0016043; GO:0006139	plastid; anatomical structure morphogenesis; multicellular organismal development; biosynthetic process; cellular process; lipid metabolic process; cellular component organization; nucleobase-containing compound metabolic process
OG_23375	P.008G248400	T66217	0.0125871	0.0679006	0.185375	ovate family protein 17
OG_23475	P.009G215500	T17862	0.0135601	0.0732878	0.185026	Pentatricopeptide repeat (PPR-like) superfamily protein	GO:0005515	protein binding
OG_23450	P.010G104900	T17344	0.0053051	0.0286858	0.184938	ketopantoate hydroxymethyltransferase 1	GO:0016740; GO:0005488; GO:0009058; GO:0009987; GO:0008152; GO:0005739	transferase activity; binding; biosynthetic process; cellular process; metabolic process; mitochondrion
OG_23203	P.011G027500	T52721	0.00890229	0.0483898	0.18397	Protein of unknown function (DUF185)	GO:0005488; GO:0015979; GO:0006091	binding; photosynthesis; generation of precursor metabolites and energy
OG_22831	P.009G136500	T58801	0.0097893	0.0533548	0.183476	MAP kinase substrate 1
OG_23531	P.007G224100	T34094	0.0159236	0.0871742	0.182664	KDO transferase A	GO:0009987; GO:0009056; GO:0016740; GO:0000003; GO:0009791; GO:0009628; GO:0009058	cellular process; catabolic process; transferase activity; reproduction; post-embryonic development; response to abiotic stimulus; biosynthetic process
OG_22966	P.003G160100	T10109	0.0140466	0.0769979	0.182428	golgi nucleotide sugar transporter 4	GO:0016020; GO:0005794; GO:0006810	membrane; Golgi apparatus; transport
OG_22859	P.007G069600	T54908	0.0097346	0.0534659	0.182071	Cytochrome b561/ferric reductase transmembrane protein family	GO:0016049; GO:0009653; GO:0030154; GO:0007275; GO:0016020; GO:0009058; GO:0005975; GO:0016043; GO:0009987; GO:0009605; GO:0009628; GO:0008150; GO:0009536; GO:0005773; GO:0003824	cell growth; anatomical structure morphogenesis; cell differentiation; multicellular organismal development; membrane; biosynthetic process; carbohydrate metabolic process; cellular component organization; cellular process; response to external stimulus; response to abiotic stimulus; biological_process; plastid; vacuole; catalytic activity
OG_23659	P.001G095800	T41638	0.0152576	0.084115	0.18139	Flavin containing amine oxidoreductase family	GO:0008152; GO:0009058; GO:0009987; GO:0016020; GO:0005739; GO:0003824; GO:0000003; GO:0009791; GO:0009536; GO:0009790	metabolic process; biosynthetic process; cellular process; membrane; mitochondrion; catalytic activity; reproduction; post-embryonic development; plastid; embryo development
OG_22928	P.002G309900	T20423	0.00856104	0.0473852	0.180669	Tetratricopeptide repeat (TPR)-like superfamily protein	GO:0005515	protein binding
OG_22775	P.005G182400	T29994	0.0155992	0.0869579	0.179388	NOD26-like intrinsic protein 6;1	GO:0006810; GO:0009987; GO:0005886; GO:0005215; GO:0016020; GO:0009991; GO:0007154	transport; cellular process; plasma membrane; transporter activity; membrane; response to extracellular stimulus; cell communication
OG_22868	P.007G057700	T05222	0.00864967	0.0482798	0.179157	Pentatricopeptide repeat (PPR) superfamily protein	GO:0003723; GO:0009058; GO:0009987; GO:0006629; GO:0007275; GO:0008152; GO:0005515	RNA binding; biosynthetic process; cellular process; lipid metabolic process; multicellular organismal development; metabolic process; protein binding
OG_23449	P.010G001400	T08895	0.0138137	0.0772033	0.178926	S-adenosyl-L-methionine-dependent methyltransferases superfamily protein
OG_23055	P.001G105100	T27991	0.0136197	0.0770298	0.176811	polyribonucleotide nucleotidyltransferase, putative	GO:0006139; GO:0009056; GO:0004518; GO:0003723; GO:0016740	nucleobase-containing compound metabolic process; catabolic process; nuclease activity; RNA binding; transferase activity
OG_23516	P.002G223100	T07710	0.0101889	0.0581003	0.175368	endonuclease 4	GO:0004518; GO:0006259; GO:0009056; GO:0003676	nuclease activity; DNA metabolic process; catabolic process; nucleic acid binding
OG_22596	P.006G214500	T56879	0.0199462	0.114064	0.174869	maternal effect embryo arrest 9	GO:0007275; GO:0006950; GO:0009056; GO:0009987; GO:0000003; GO:0009791; GO:0009790; GO:0005886	multicellular organismal development; response to stress; catabolic process; cellular process; reproduction; post-embryonic development; embryo development; plasma membrane
OG_23437	P.003G197000	T33560	0.00881158	0.0504356	0.174709	S-adenosyl-L-methionine-dependent methyltransferases superfamily protein	GO:0005737; GO:0016740; GO:0006139	cytoplasm; transferase activity; nucleobase-containing compound metabolic process
OG_23444	P.002G068000	T55400	0.17688	1.01367	0.174496	thioredoxin 2	GO:0019725; GO:0003674; GO:0003824; GO:0008152	cellular homeostasis; molecular_function; catalytic activity; metabolic process
OG_23106	P.003G239700	T55132	0.403004	2.32303	0.173482	UDP-glucosyl transferase 84B1	GO:0008152; GO:0016740	metabolic process; transferase activity
OG_22869	P.007G054700	T07277	0.00584672	0.0338753	0.172595	Expressed protein
OG_22718	P.002G029100	T56181	0.014195	0.0824649	0.172133	Expressed protein	GO:0009058; GO:0009987; GO:0019748; GO:0006629; GO:0006464	biosynthetic process; cellular process; secondary metabolic process; lipid metabolic process; cellular protein modification process
OG_23010	P.003G250300	T16949	0.00326357	0.0189925	0.171835	RNA-binding (RRM/RBD/RNP motifs) family protein	GO:0000166; GO:0003723	nucleotide binding; RNA binding
OG_23272	P.001G256500	T57273	0.0132009	0.0774561	0.170431	ARM repeat superfamily protein	GO:0016043; GO:0009987; GO:0006810; GO:0008150; GO:0005488	cellular component organization; cellular process; transport; biological_process; binding
OG_22931	P.004G166400	T30262	0.00847398	0.0497831	0.170218	phytochrome-associated protein 2	GO:0006412; GO:0009058; GO:0006139; GO:0005515; GO:0003700; GO:0009908; GO:0009653; GO:0009719; GO:0007165; GO:0007275; GO:0005634; GO:0005622	translation; biosynthetic process; nucleobase-containing compound metabolic process; protein binding; sequence-specific DNA binding transcription factor activity; flower development; anatomical structure morphogenesis; response to endogenous stimulus; signal transduction; multicellular organismal development; nucleus; intracellular
OG_23238	P.001G174700	T48750	0.00859339	0.0505268	0.170076	minichromosome maintenance 8	GO:0006259; GO:0009058; GO:0003677; GO:0000166	DNA metabolic process; biosynthetic process; DNA binding; nucleotide binding
OG_22861	P.008G292300	T51715	0.0145144	0.0855877	0.169585	homoserine kinase	GO:0016301; GO:0008152; GO:0009987; GO:0000166	kinase activity; metabolic process; cellular process; nucleotide binding
OG_23064	P.001G099300	T29962	0.00678925	0.0400883	0.169357	Syntaxin/t-SNARE family protein	GO:0016020; GO:0006810; GO:0005515	membrane; transport; protein binding
OG_23369	P.004G171800	T20697	0.00870479	0.0516235	0.168621	Mitochondrial substrate carrier family protein	GO:0016020; GO:0005739; GO:0006810; GO:0009987; GO:0005215	membrane; mitochondrion; transport; cellular process; transporter activity
OG_22661	P.006G091900	T19860	0.0194392	0.116025	0.167543	Chaperone DnaJ-domain superfamily protein	GO:0005515	protein binding
OG_23533	P.007G247600	T56296	0.010241	0.0612902	0.16709	basic region/leucine zipper motif 60	GO:0009987; GO:0008150; GO:0009605; GO:0009607; GO:0007165; GO:0009719; GO:0008219; GO:0009628; GO:0006950; GO:0003700; GO:0009058; GO:0006139; GO:0003677	cellular process; biological_process; response to external stimulus; response to biotic stimulus; signal transduction; response to endogenous stimulus; cell death; response to abiotic stimulus; response to stress; sequence-specific DNA binding transcription factor activity; biosynthetic process; nucleobase-containing compound metabolic process; DNA binding
OG_22782	P.003G126200	T15216	0.00835706	0.0504098	0.165783	Haloacid dehalogenase-like hydrolase (HAD) superfamily protein	GO:0008152; GO:0009987; GO:0016787; GO:0006139; GO:0009056	metabolic process; cellular process; hydrolase activity; nucleobase-containing compound metabolic process; catabolic process
OG_22760	P.005G153800	T36770	0.0120823	0.0733731	0.164669	electron-transfer flavoprotein:ubiquinone oxidoreductase	GO:0003824; GO:0008152; GO:0009987; GO:0009056; GO:0003674; GO:0009058; GO:0005739	catalytic activity; metabolic process; cellular process; catabolic process; molecular_function; biosynthetic process; mitochondrion
OG_22956	P.003G292300	T58295	0.00329685	0.0201096	0.163945	LAG1 homologue 2	GO:0009058; GO:0009987; GO:0006629; GO:0016020; GO:0016740; GO:0009605; GO:0009607; GO:0005783; GO:0005794; GO:0005886; GO:0019538	biosynthetic process; cellular process; lipid metabolic process; membrane; transferase activity; response to external stimulus; response to biotic stimulus; endoplasmic reticulum; Golgi apparatus; plasma membrane; protein metabolic process
OG_23293	P.001G228100	T07677	0.00683697	0.0418013	0.163559	Oxidoreductase family protein	GO:0009058; GO:0009987; GO:0003824; GO:0000166; GO:0008152	biosynthetic process; cellular process; catalytic activity; nucleotide binding; metabolic process
OG_22941	P.008G052100	T56206	0.00866208	0.0532112	0.162787	lecithin:cholesterol acyltransferase 3	GO:0016740; GO:0006629; GO:0009058; GO:0019538; GO:0009987	transferase activity; lipid metabolic process; biosynthetic process; protein metabolic process; cellular process
OG_23511	P.008G013900	T23001	0.0117974	0.0725588	0.162591	Pentatricopeptide repeat (PPR) superfamily protein	GO:0005515	protein binding
OG_22829	P.009G135500	T29847	0.00649446	0.0400425	0.162189	nodulin MtN21 /EamA-like transporter family protein	GO:0016020; GO:0005215	membrane; transporter activity
OG_23117	P.008G079900	T19912	0.00536918	0.0331943	0.16175	nuclear shuttle interacting	GO:0016740; GO:0005975; GO:0006139; GO:0009056; GO:0009536; GO:0009058; GO:0019538; GO:0009987	transferase activity; carbohydrate metabolic process; nucleobase-containing compound metabolic process; catabolic process; plastid; biosynthetic process; protein metabolic process; cellular process
OG_23304	P.005G058900	T58216	0.0109492	0.0678251	0.161434	Galactose oxidase/kelch repeat superfamily protein	GO:0005634; GO:0008150; GO:0005737; GO:0005515	nucleus; biological_process; cytoplasm; protein binding
OG_23438	P.009G242400	T14318	0.00491096	0.0305199	0.16091	phosphorylcholine cytidylyltransferase	GO:0016740; GO:0009058; GO:0009987; GO:0006629	transferase activity; biosynthetic process; cellular process; lipid metabolic process
OG_23373	P.006G064800	T58723	0.0103232	0.0642683	0.160627	zinc finger (C2H2 type) family protein	GO:0009058; GO:0006629; GO:0003700; GO:0003676; GO:0016020; GO:0016740; GO:0005488; GO:0006139; GO:0005622	biosynthetic process; lipid metabolic process; sequence-specific DNA binding transcription factor activity; nucleic acid binding; membrane; transferase activity; binding; nucleobase-containing compound metabolic process; intracellular
OG_23218	P.002G137400	T57941	0.0074155	0.046227	0.160415	shikimate kinase like 2	GO:0009058; GO:0009987; GO:0006629; GO:0016043; GO:0006091; GO:0015979; GO:0008152; GO:0009056; GO:0019748; GO:0009536; GO:0009653; GO:0007275; GO:0016301; GO:0030154; GO:0006139; GO:0000166	biosynthetic process; cellular process; lipid metabolic process; cellular component organization; generation of precursor metabolites and energy; photosynthesis; metabolic process; catabolic process; secondary metabolic process; plastid; anatomical structure morphogenesis; multicellular organismal development; kinase activity; cell differentiation; nucleobase-containing compound metabolic process…
OG_23132	P.008G286800	T26700	0.00388424	0.024255	0.160142	Ribosomal L18p/L5e family protein	GO:0005840; GO:0005198; GO:0006412; GO:0008150	ribosome; structural molecule activity; translation; biological_process
OG_22937	P.008G006900	T24672	0.0173323	0.108633	0.15955	Expressed protein
OG_23140	P.003G278000	T59241	0.0108477	0.0684372	0.158506	Tetratricopeptide repeat (TPR)-like superfamily protein
OG_23069	P.007G104300	T18308	0.00910064	0.0574388	0.15844	Galactose oxidase/kelch repeat superfamily protein	GO:0006464; GO:0009058; GO:0005975; GO:0006810; GO:0005515	cellular protein modification process; biosynthetic process; carbohydrate metabolic process; transport; protein binding
OG_22889	P.002G188500	T07851	0.00872235	0.0552321	0.157922	Nucleotide-diphospho-sugar transferase family protein	GO:0016740	transferase activity
OG_23222	P.010G031200	T58255	0.00969309	0.0616253	0.157291	Expressed protein
OG_22987	P.005G118000	T32200	0.00606406	0.038678	0.156783	Protein kinase superfamily protein	GO:0005886; GO:0016301; GO:0006464; GO:0000166	plasma membrane; kinase activity; cellular protein modification process; nucleotide binding
OG_23131	P.008G284300	T55562	0.496759	3.17728	0.156347	F-box family protein	GO:0009719; GO:0007165; GO:0007275; GO:0005622	response to endogenous stimulus; signal transduction; multicellular organismal development; intracellular
OG_23260	P.001G244600	T57159	0.0125484	0.0805356	0.155812	RING/U-box superfamily protein	GO:0005488; GO:0005515	binding; protein binding
OG_22893	P.002G205400	T56062	0.00420645	0.0272987	0.154089	RNA-binding (RRM/RBD/RNP motifs) family protein with retrovirus zinc finger-like domain	GO:0005488; GO:0003676; GO:0000166	binding; nucleic acid binding; nucleotide binding
OG_23061	P.001G100500	T30357	0.00716693	0.0470298	0.152391	Arabidopsis NAC domain containing protein 87	GO:0003677; GO:0009058; GO:0006139	DNA binding; biosynthetic process; nucleobase-containing compound metabolic process
OG_22666	P.006G095900	T38318	0.00690575	0.0454757	0.151856	Expressed protein	GO:0019725; GO:0006810	cellular homeostasis; transport
OG_23377	P.008G242500	T57831	0.0102402	0.0688254	0.148786	NC domain-containing protein-related
OG_22867	P.007G063300	T58210	0.0111623	0.0753047	0.148228	protein binding;zinc ion binding	GO:0006950; GO:0008219; GO:0009605; GO:0009607; GO:0008152; GO:0005515; GO:0005488	response to stress; cell death; response to external stimulus; response to biotic stimulus; metabolic process; protein binding; binding
OG_23599	P.005G030300	T40543	0.00930957	0.0631144	0.147503	Expressed protein
OG_22813	P.007G213300	T57290	0.00725043	0.0494806	0.146531	Expressed protein
OG_22791	P.003G140500	T56340	0.0132941	0.0910319	0.146037	lysophospholipase 2	GO:0008150; GO:0005575; GO:0005886; GO:0006950; GO:0016740; GO:0016787; GO:0009058; GO:0019538; GO:0009987; GO:0006629; GO:0009056	biological_process; cellular_component; plasma membrane; response to stress; transferase activity; hydrolase activity; biosynthetic process; protein metabolic process; cellular process; lipid metabolic process; catabolic process
OG_23379	P.011G003100	T47764	0.0160772	0.110879	0.144997	CRINKLY4 related 4	GO:0009058; GO:0009987; GO:0009719; GO:0006464; GO:0000166; GO:0016301; GO:0005515; GO:0008152	biosynthetic process; cellular process; response to endogenous stimulus; cellular protein modification process; nucleotide binding; kinase activity; protein binding; metabolic process
OG_23026	P.007G133100	T58139	0.00404457	0.0280169	0.144362	inhibitor/interactor with cyclin-dependent kinase	GO:0007049; GO:0009791; GO:0009987; GO:0006464; GO:0006139; GO:0009056; GO:0006259; GO:0009058; GO:0030234; GO:0005737; GO:0005515; GO:0005634	cell cycle; post-embryonic development; cellular process; cellular protein modification process; nucleobase-containing compound metabolic process; catabolic process; DNA metabolic process; biosynthetic process; enzyme regulator activity; cytoplasm; protein binding; nucleus
OG_23471	P.001G027200	T37537	0.0068163	0.0475156	0.143454	voltage dependent anion channel 2	GO:0016020; GO:0005739; GO:0006810; GO:0009987; GO:0005215	membrane; mitochondrion; transport; cellular process; transporter activity
OG_23114	P.008G083900	T55982	0.00431616	0.0301383	0.143212	Expressed protein	GO:0007275; GO:0005886; GO:0006950	multicellular organismal development; plasma membrane; response to stress
OG_23410	P.008G175700	T59708	0.0110559	0.0774674	0.142717	Phosphate-responsive 1 family protein	GO:0005618; GO:0009719	cell wall; response to endogenous stimulus
OG_22722	P.002G019000	T51798	0.0169018	0.118747	0.142334	Protein of unknown function (DUF1685)	GO:0006950; GO:0009628	response to stress; response to abiotic stimulus
OG_22959	P.009G240300	T40149	0.00760469	0.053455	0.142263	HISTIDINE TRIAD NUCLEOTIDE-BINDING 2	GO:0008152; GO:0003824; GO:0005515; GO:0005488; GO:0009536	metabolic process; catalytic activity; protein binding; binding; plastid
OG_22657	P.006G088000	T60326	0.00396412	0.0280045	0.141553	Plant invertase/pectin methylesterase inhibitor superfamily	GO:0005618; GO:0016043; GO:0009987; GO:0016787; GO:0030234; GO:0008152; GO:0005975; GO:0009056	cell wall; cellular component organization; cellular process; hydrolase activity; enzyme regulator activity; metabolic process; carbohydrate metabolic process; catabolic process
OG_22662	P.006G092000	T61683	0.0101439	0.0720615	0.140768	Tetratricopeptide repeat (TPR)-like superfamily protein	GO:0005515	protein binding
OG_23076	P.002G235700	T57110	0.00925128	0.0662248	0.139695	Galactose oxidase/kelch repeat superfamily protein	GO:0005515	protein binding
OG_22771	P.005G175800	T15219	0.0115193	0.083269	0.138339	Pectin lyase-like superfamily protein	GO:0005576; GO:0016787; GO:0005975; GO:0009987	extracellular region; hydrolase activity; carbohydrate metabolic process; cellular process
OG_23168	P.002G319400	T18385	0.00969071	0.0700874	0.138266	RNI-like superfamily protein	GO:0000003; GO:0009791; GO:0009790; GO:0005515	reproduction; post-embryonic development; embryo development; protein binding
OG_23622	P.010G146500	T66636	0.00840739	0.0610184	0.137784	Uncharacterised protein family (UPF0497)	GO:0005886; GO:0016020	plasma membrane; membrane
OG_22862	P.003G223700	T38704	0.0158638	0.115707	0.137103	TraB family protein
OG_22671	P.006G099800	T56291	0.0145512	0.107174	0.135772	DNA-damage-repair/toleration protein (DRT102)	GO:0005975; GO:0006950; GO:0006259; GO:0003824; GO:0005829; GO:0009628	carbohydrate metabolic process; response to stress; DNA metabolic process; catalytic activity; cytosol; response to abiotic stimulus
OG_22629	P.006G152700	T58235	0.0054351	0.0403285	0.134771	dehydratase family	GO:0005488; GO:0003824; GO:0009058; GO:0006139; GO:0007275; GO:0009536; GO:0009987	binding; catalytic activity; biosynthetic process; nucleobase-containing compound metabolic process; multicellular organismal development; plastid; cellular process
OG_22682	P.009G144600	T35341	0.546132	4.05754	0.134597	RING/U-box superfamily protein	GO:0005488; GO:0005515	binding; protein binding
OG_22819	P.007G203500	T57303	0.00539867	0.0403323	0.133855	non-intrinsic ABC protein 9	GO:0005975; GO:0009056; GO:0006810; GO:0008150; GO:0009628; GO:0009058; GO:0006139; GO:0000166; GO:0016787; GO:0005215	carbohydrate metabolic process; catabolic process; transport; biological_process; response to abiotic stimulus; biosynthetic process; nucleobase-containing compound metabolic process; nucleotide binding; hydrolase activity; transporter activity
OG_23441	P.011G037800	T39757	0.00674472	0.0507082	0.13301	YEATS family protein	GO:0005634; GO:0009058; GO:0006139	nucleus; biosynthetic process; nucleobase-containing compound metabolic process
OG_23044	P.001G101300	T16975	0.00592776	0.0449494	0.131876	Expressed protein	GO:0005768; GO:0005794	endosome; Golgi apparatus
OG_23455	P.005G043300	T40955	0.00600201	0.0456945	0.131351	mannosyltransferase family protein	GO:0006464; GO:0009058; GO:0006629; GO:0016020; GO:0005975; GO:0009987; GO:0016740; GO:0005783; GO:0009790	cellular protein modification process; biosynthetic process; lipid metabolic process; membrane; carbohydrate metabolic process; cellular process; transferase activity; endoplasmic reticulum; embryo development
OG_22595	P.006G218300	T55657	0.0122419	0.0935745	0.130825	NIFU-like protein 2	GO:0016043; GO:0009058; GO:0005488; GO:0009987; GO:0009536; GO:0005198	cellular component organization; biosynthetic process; binding; cellular process; plastid; structural molecule activity
OG_23452	P.008G214900	T16415	0.00687758	0.0526431	0.130646	Expressed protein
OG_22960	P.002G097800	T57210	0.00737254	0.0564933	0.130503	Expressed protein	GO:0009536	plastid
OG_22802	P.003G079600	T17008	0.0120247	0.0923088	0.130267	arogenate dehydratase 1	GO:0003824; GO:0006950; GO:0009628; GO:0009908; GO:0009605; GO:0009058; GO:0009987; GO:0005488	catalytic activity; response to stress; response to abiotic stimulus; flower development; response to external stimulus; biosynthetic process; cellular process; binding
OG_22844	P.009G151200	T26182	0.00755558	0.0594208	0.127154	Pectin lyase-like superfamily protein	GO:0005576; GO:0016787; GO:0003674; GO:0005488; GO:0005975; GO:0009987	extracellular region; hydrolase activity; molecular_function; binding; carbohydrate metabolic process; cellular process
OG_23102	P.001G036100	T06326	0.01957	0.153998	0.127079	Protein of unknown function (DUF761)
OG_23623	P.002G076900	T59290	0.00811137	0.0645085	0.125741	response regulator 3	GO:0007165; GO:0016301; GO:0008152; GO:0009987; GO:0009058; GO:0006139; GO:0004871	signal transduction; kinase activity; metabolic process; cellular process; biosynthetic process; nucleobase-containing compound metabolic process; signal transducer activity
OG_23552	P.008G018900	T57304	0.0162692	0.13052	0.12465	Sterile alpha motif (SAM) domain-containing protein	GO:0005515	protein binding
OG_22774	P.005G178300	T82390	0.0165999	0.133573	0.124276	Cystathionine beta-synthase (CBS) protein	GO:0016301; GO:0000166; GO:0008152; GO:0009987	kinase activity; nucleotide binding; metabolic process; cellular process
OG_23032	P.006G133000	T31854	0.00852073	0.0695208	0.122564	NAD(P)-binding Rossmann-fold superfamily protein	GO:0003824; GO:0005886; GO:0009058; GO:0009987; GO:0019748; GO:0005488; GO:0000166; GO:0008152	catalytic activity; plasma membrane; biosynthetic process; cellular process; secondary metabolic process; binding; nucleotide binding; metabolic process
OG_23174	P.002G127100	T56292	0.0114751	0.0937614	0.122386	alternative oxidase 1A	GO:0005488; GO:0006091; GO:0006950; GO:0009628; GO:0016020; GO:0005739; GO:0008150; GO:0005515; GO:0003824; GO:0007165	binding; generation of precursor metabolites and energy; response to stress; response to abiotic stimulus; membrane; mitochondrion; biological_process; protein binding; catalytic activity; signal transduction
OG_22929	P.002G310200	T06429	0.0122538	0.100156	0.122347	Integrase-type DNA-binding superfamily protein	GO:0003700; GO:0003677; GO:0005634; GO:0009058; GO:0006139; GO:0005622	sequence-specific DNA binding transcription factor activity; DNA binding; nucleus; biosynthetic process; nucleobase-containing compound metabolic process; intracellular
OG_22993	P.001G124300	T10147	0.00533708	0.0442114	0.120717	pyrroline-5- carboxylate (P5C) reductase	GO:0005618; GO:0008152; GO:0006950; GO:0009628; GO:0009058; GO:0009987; GO:0000166; GO:0009056; GO:0003824; GO:0005737	cell wall; metabolic process; response to stress; response to abiotic stimulus; biosynthetic process; cellular process; nucleotide binding; catabolic process; catalytic activity; cytoplasm
OG_22631	P.001G180100	T56083	0.00636185	0.0527574	0.120587	Rhodanese/Cell cycle control phosphatase superfamily protein	GO:0016787; GO:0005515; GO:0003824; GO:0006464; GO:0008150; GO:0009536; GO:0005634; GO:0005739; GO:0008152; GO:0009987	hydrolase activity; protein binding; catalytic activity; cellular protein modification process; biological_process; plastid; nucleus; mitochondrion; metabolic process; cellular process
OG_22799	P.004G002100	T56459	0.0111166	0.0924822	0.120203	Ribosomal protein L10 family protein	GO:0005840; GO:0003723; GO:0009536; GO:0008150	ribosome; RNA binding; plastid; biological_process
OG_23347	P.002G163700	T06324	0.010759	0.0903318	0.119105	Integrase-type DNA-binding superfamily protein	GO:0009058; GO:0006139; GO:0003677; GO:0003700; GO:0005634; GO:0005622	biosynthetic process; nucleobase-containing compound metabolic process; DNA binding; sequence-specific DNA binding transcription factor activity; nucleus; intracellular
OG_22644	P.001G207500	T14911	0.00605805	0.0511016	0.118549	alpha/beta-Hydrolases superfamily protein	GO:0003824; GO:0008152	catalytic activity; metabolic process
OG_22938	P.008G049900	T57544	0.00317698	0.0269786	0.117759	SNARE-like superfamily protein	GO:0006810; GO:0005622	transport; intracellular
OG_23158	P.002G330700	T08673	0.0134715	0.115043	0.1171	non-intrinsic ABC protein 3	GO:0005215; GO:0006139; GO:0009056; GO:0016020; GO:0005773; GO:0000166; GO:0016787; GO:0006810; GO:0009987	transporter activity; nucleobase-containing compound metabolic process; catabolic process; membrane; vacuole; nucleotide binding; hydrolase activity; transport; cellular process
OG_23563	P.007G231900	T55870	0.00645971	0.055307	0.116797	Expressed protein
OG_23173	P.002G127200	T35818	0.00568056	0.0486466	0.116772	solute:sodium symporters;urea transmembrane transporters	GO:0006810; GO:0009987; GO:0005886; GO:0005215; GO:0016020	transport; cellular process; plasma membrane; transporter activity; membrane
OG_23176	P.002G126700	T20007	0.0145963	0.125504	0.116302	KAR-UP F-box 1
OG_22756	P.005G148800	T41871	0.012213	0.10593	0.115293	AGC (cAMP-dependent, cGMP-dependent and protein kinase C) kinase family protein	GO:0000166; GO:0006464; GO:0016301	nucleotide binding; cellular protein modification process; kinase activity
OG_23548	P.001G002100	T54988	0.0102323	0.0888993	0.1151	chloroplastic drought-induced stress protein of 32 kD	GO:0006950; GO:0009628; GO:0009536; GO:0003674; GO:0019725; GO:0008152; GO:0003824	response to stress; response to abiotic stimulus; plastid; molecular_function; cellular homeostasis; metabolic process; catalytic activity
OG_23472	P.001G027300	T07125	0.00745738	0.0650846	0.11458	ARM repeat superfamily protein	GO:0003824; GO:0005515	catalytic activity; protein binding
OG_23151	P.005G161200	T39979	0.0120702	0.106551	0.113281	DOF zinc finger protein 1	GO:0003677; GO:0009058; GO:0006139	DNA binding; biosynthetic process; nucleobase-containing compound metabolic process
OG_23663	P.006G205400	T55005	0.00549171	0.0485869	0.113029	Aldolase-type TIM barrel family protein	GO:0003824; GO:0008152; GO:0009987; GO:0008150; GO:0009605; GO:0009607; GO:0005829; GO:0006139; GO:0016020; GO:0005739	catalytic activity; metabolic process; cellular process; biological_process; response to external stimulus; response to biotic stimulus; cytosol; nucleobase-containing compound metabolic process; membrane; mitochondrion
OG_23503	P.006G013500	T11988	0.00827638	0.0740361	0.111788	Thymidine kinase	GO:0006259; GO:0009058; GO:0016301; GO:0008152; GO:0009987; GO:0000166; GO:0006139	DNA metabolic process; biosynthetic process; kinase activity; metabolic process; cellular process; nucleotide binding; nucleobase-containing compound metabolic process
OG_23215	P.002G132500	T28722	0.00472904	0.0423065	0.11178	Homeodomain-like superfamily protein	GO:0003700; GO:0003677; GO:0003682; GO:0009058; GO:0006139; GO:0005622	sequence-specific DNA binding transcription factor activity; DNA binding; chromatin binding; biosynthetic process; nucleobase-containing compound metabolic process; intracellular
OG_23060	P.001G109600	T55737	0.00472933	0.0426141	0.11098	HNH endonuclease	GO:0004518; GO:0009719; GO:0006950; GO:0009628; GO:0003676	nuclease activity; response to endogenous stimulus; response to stress; response to abiotic stimulus; nucleic acid binding
OG_23277	P.003G229700	T57933	0.00606978	0.0548632	0.110635	Expressed protein	GO:0006810	transport
OG_22994	P.001G125200	T15139	0.00695804	0.0635804	0.109437	Eukaryotic rpb5 RNA polymerase subunit family protein	GO:0016740; GO:0006139; GO:0009058; GO:0003677; GO:0005730	transferase activity; nucleobase-containing compound metabolic process; biosynthetic process; DNA binding; nucleolus
OG_22924	P.003G088700	T14681	0.00828991	0.077024	0.107628	phosphofructokinase 2	GO:0008152; GO:0009987; GO:0016301; GO:0005829; GO:0000166; GO:0006091; GO:0005975; GO:0009056; GO:0009058; GO:0006139	metabolic process; cellular process; kinase activity; cytosol; nucleotide binding; generation of precursor metabolites and energy; carbohydrate metabolic process; catabolic process; biosynthetic process; nucleobase-containing compound metabolic process
OG_23500	P.004G080400	T28349	0.00652916	0.0608723	0.10726	UTP:galactose-1-phosphate uridylyltransferases;ribose-5-phosphate adenylyltransferases	GO:0016740; GO:0005975; GO:0005488; GO:0009991; GO:0006950; GO:0007154; GO:0006139	transferase activity; carbohydrate metabolic process; binding; response to extracellular stimulus; response to stress; cell communication; nucleobase-containing compound metabolic process
OG_23504	P.006G007400	T44148	0.00897897	0.0845368	0.106214	ankyrin repeat family protein	GO:0009838; GO:0009908; GO:0009653; GO:0007275; GO:0005515	abscission; flower development; anatomical structure morphogenesis; multicellular organismal development; protein binding
OG_22724	P.002G016700	T29478	0.00812353	0.0765928	0.106061	cooperatively regulated by ethylene and jasmonate 1	GO:0003700; GO:0003677; GO:0005634; GO:0009058; GO:0006139; GO:0005622	sequence-specific DNA binding transcription factor activity; DNA binding; nucleus; biosynthetic process; nucleobase-containing compound metabolic process; intracellular
OG_22749	P.005G097800	T22924	0.00262697	0.024885	0.105565	Basic-leucine zipper (bZIP) transcription factor family protein	GO:0003677; GO:0003700; GO:0009058; GO:0006139; GO:0005622	DNA binding; sequence-specific DNA binding transcription factor activity; biosynthetic process; nucleobase-containing compound metabolic process; intracellular
OG_22737	P.002G062400	T56402	0.00598104	0.0572593	0.104455	plant VAP homolog 12	GO:0005198; GO:0016020; GO:0005783	structural molecule activity; membrane; endoplasmic reticulum
OG_23192	P.001G017200	T15030	0.011223	0.109332	0.102651	inositol polyphosphate 5-phosphatase 11	GO:0009987; GO:0006629; GO:0016787; GO:0009058	cellular process; lipid metabolic process; hydrolase activity; biosynthetic process
OG_23210	P.011G018700	T56821	0.00793531	0.0781019	0.101602	pfkB-like carbohydrate kinase family protein	GO:0005975; GO:0016043; GO:0009987; GO:0015979; GO:0016301; GO:0008152; GO:0009536; GO:0009058; GO:0006629; GO:0006139; GO:0009056	carbohydrate metabolic process; cellular component organization; cellular process; photosynthesis; kinase activity; metabolic process; plastid; biosynthetic process; lipid metabolic process; nucleobase-containing compound metabolic process; catabolic process
OG_23502	P.002G050700	T56195	0.00681699	0.067381	0.101171	ethylene-dependent gravitropism-deficient and yellow-green-like 3	GO:0016787; GO:0019538; GO:0009987	hydrolase activity; protein metabolic process; cellular process
OG_22910	P.007G029500	T68780	0.0017618	0.0180951	0.0973631	C2H2 and C2HC zinc fingers superfamily protein	GO:0005488; GO:0003676	binding; nucleic acid binding
OG_23354	P.003G022100	T36952	0.0143077	0.146967	0.0973532	chlororespiratory reduction 3	GO:0016020	membrane
OG_23317	P.007G002200	T57818	0.0173722	0.180369	0.096315	basic helix-loop-helix (bHLH) DNA-binding superfamily protein	GO:0005515	protein binding
OG_23232	P.002G050900	T59644	0.0120685	0.125517	0.0961504	Expressed protein
OG_20632	P.002G034700	T10649	0.00834704	0.0873595	0.0955481	3\'-5\'-exoribonuclease family protein	GO:0004518	nuclease activity
OG_23573	P.007G005900	T58341	0.00849732	0.0892988	0.095156	peptidase M1 family protein	GO:0005829; GO:0005488; GO:0009058; GO:0009987; GO:0006629; GO:0006259; GO:0016043; GO:0006464; GO:0019538; GO:0016787; GO:0008150; GO:0040029	cytosol; binding; biosynthetic process; cellular process; lipid metabolic process; DNA metabolic process; cellular component organization; cellular protein modification process; protein metabolic process; hydrolase activity; biological_process; regulation of gene expression, epigenetic
OG_23259	P.008G222200	T56369	0.0722869	0.765912	0.09438	LOB domain-containing protein 21
OG_23343	P.001G074800	T57768	0.00694359	0.074985	0.0925997	appr-1-p processing enzyme family protein	GO:0005829	cytosol
OG_23489	P.008G017000	T36075	0.00386087	0.0428869	0.0900243	Expressed protein
OG_22850	P.007G092600	T58070	0.00400143	0.0444884	0.0899433	Expressed protein	GO:0005515	protein binding
OG_23400	P.003G219500	T16872	0.00582746	0.0655291	0.0889295	YbaK/aminoacyl-tRNA synthetase-associated domain	GO:0006412; GO:0016787	translation; hydrolase activity
OG_22789	P.003G139800	T71744	0.00381311	0.0429448	0.0887908	plant intracellular ras group-related LRR 6	GO:0016787; GO:0006464; GO:0005515	hydrolase activity; cellular protein modification process; protein binding
OG_22839	P.009G140600	T08946	0.00209632	0.0239648	0.0874751	LOB domain-containing protein 15
OG_22695	P.009G089200	T07738	0.0115137	0.133906	0.0859837	Plant protein of unknown function (DUF868)
OG_23073	P.007G094400	T57212	0.00932157	0.110045	0.0847066	alpha/beta-Hydrolases superfamily protein
OG_22965	P.003G180300	T09449	0.00907428	0.107212	0.084639	tetraspanin11	GO:0016020	membrane
OG_23456	P.011G203200	T58167	0.00228173	0.0274273	0.083192	Cyclophilin-like peptidyl-prolyl cis-trans isomerase family protein	GO:0019538; GO:0009987; GO:0005773; GO:0005886; GO:0006464; GO:0005829; GO:0003824	protein metabolic process; cellular process; vacuole; plasma membrane; cellular protein modification process; cytosol; catalytic activity
OG_22736	P.002G057100	T90735	0.00346711	0.0419197	0.0827083	MUTS-like protein 4	GO:0016043; GO:0006950; GO:0006259; GO:0007049; GO:0009628; GO:0000003; GO:0005634; GO:0003677; GO:0005575; GO:0006139; GO:0000166	cellular component organization; response to stress; DNA metabolic process; cell cycle; response to abiotic stimulus; reproduction; nucleus; DNA binding; cellular_component; nucleobase-containing compound metabolic process; nucleotide binding
OG_23439	P.009G242300	T34001	0.00292975	0.0354716	0.0825945	S-adenosyl-L-methionine-dependent methyltransferases superfamily protein	GO:0008152; GO:0016740	metabolic process; transferase activity
OG_22901	P.007G014900	T57087	0.00561412	0.0685198	0.0819342	prefoldin 5	GO:0019538; GO:0009987; GO:0005575; GO:0005515	protein metabolic process; cellular process; cellular_component; protein binding
OG_23226	P.002G042300	T50674	0.0138563	0.169576	0.0817111	PLANT HOMOLOGOUS TO PARAFIBROMIN	GO:0009908; GO:0016043; GO:0006464; GO:0000003; GO:0009791; GO:0005730; GO:0005515	flower development; cellular component organization; cellular protein modification process; reproduction; post-embryonic development; nucleolus; protein binding
OG_23446	P.002G080400	T11542	0.00793474	0.10225	0.0776014	Protein kinase superfamily protein	GO:0016301; GO:0006464; GO:0000166	kinase activity; cellular protein modification process; nucleotide binding
OG_22794	P.003G146100	T58081	0.00288082	0.0372825	0.0772702	Expressed protein	GO:0005886; GO:0006810; GO:0009536; GO:0016020; GO:0005737	plasma membrane; transport; plastid; membrane; cytoplasm
OG_22903	P.007G016400	T35558	0.00649674	0.0856808	0.0758249	F-box/RNI-like superfamily protein	GO:0006464; GO:0019538; GO:0009056; GO:0009987; GO:0009058; GO:0005975; GO:0016740; GO:0005515	cellular protein modification process; protein metabolic process; catabolic process; cellular process; biosynthetic process; carbohydrate metabolic process; transferase activity; protein binding
OG_22875	P.009G002300	T57270	0.00231077	0.031282	0.0738693	FMN-linked oxidoreductases superfamily protein	GO:0000166; GO:0005773; GO:0006139; GO:0003676; GO:0005488; GO:0003824; GO:0008152	nucleotide binding; vacuole; nucleobase-containing compound metabolic process; nucleic acid binding; binding; catalytic activity; metabolic process
OG_22617	P.006G179800	T09975	0.0142346	0.194121	0.0733283	ethylene responsive element binding factor 2	GO:0003700; GO:0003677; GO:0005634; GO:0009058; GO:0006139; GO:0005622	sequence-specific DNA binding transcription factor activity; DNA binding; nucleus; biosynthetic process; nucleobase-containing compound metabolic process; intracellular
OG_23236	P.001G172900	T58487	0.00322061	0.0455385	0.0707229	aluminum sensitive 3	GO:0008150	biological_process
OG_22610	P.006G187200	T36512	0.0033941	0.048429	0.0700841	RING/U-box superfamily protein	GO:0005488; GO:0005515	binding; protein binding
OG_22874	P.009G002100	T43868	0.00584506	0.0835992	0.0699176	ribosome-binding factor A family protein	GO:0003723; GO:0016043; GO:0009058; GO:0006139; GO:0009987; GO:0000003; GO:0009791; GO:0009908; GO:0009536; GO:0009790	RNA binding; cellular component organization; biosynthetic process; nucleobase-containing compound metabolic process; cellular process; reproduction; post-embryonic development; flower development; plastid; embryo development
OG_23596	P.011G107900	T60457	0.00690935	0.0998693	0.069184	Expressed protein
OG_23043	P.002G155200	T56968	0.00835838	0.121908	0.068563	BTB/POZ domain-containing protein	GO:0005886; GO:0005215; GO:0016043; GO:0006810; GO:0005515	plasma membrane; transporter activity; cellular component organization; transport; protein binding
OG_22710	P.002G112000	T20016	0.00676294	0.100861	0.0670521	GATA transcription factor 5	GO:0009058; GO:0006139; GO:0003700; GO:0003677; GO:0005634; GO:0005488; GO:0005622	biosynthetic process; nucleobase-containing compound metabolic process; sequence-specific DNA binding transcription factor activity; DNA binding; nucleus; binding; intracellular
OG_23298	P.001G242900	T35941	0.184509	2.76021	0.0668458	Protein of unknown function (DUF1313)	GO:0009628; GO:0008150	response to abiotic stimulus; biological_process
OG_22746	P.002G155500	T59616	0.247771	3.742	0.0662134	osmotin 34	GO:0009605; GO:0006950; GO:0009607	response to external stimulus; response to stress; response to biotic stimulus
OG_23637	P.011G035900	T55609	0.00846529	0.138344	0.0611899	farnesylated protein 6	GO:0006810; GO:0005488; GO:0005575; GO:0006950; GO:0009628; GO:0005886	transport; binding; cellular_component; response to stress; response to abiotic stimulus; plasma membrane
OG_22863	P.007G065700	T56739	0.00687053	0.112887	0.0608623	2-oxoglutarate (2OG) and Fe(II)-dependent oxygenase superfamily protein	GO:0030246; GO:0005488; GO:0003824; GO:0008152	carbohydrate binding; binding; catalytic activity; metabolic process
OG_23426	P.008G003500	T22478	0.0151999	0.250342	0.0607167	Major facilitator superfamily protein	GO:0016020; GO:0006810; GO:0005215	membrane; transport; transporter activity
OG_23360	P.008G266100	T33887	0.00728746	0.120739	0.0603573	Transmembrane proteins 14C	GO:0016020	membrane
OG_23558	P.006G043900	T19191	0.00368155	0.0658702	0.0558909	Translation initiation factor SUI1 family protein	GO:0008135; GO:0005840; GO:0006412	translation factor activity, nucleic acid binding; ribosome; translation
OG_23572	P.002G082400	T09326	0.00197341	0.036148	0.0545924	Arabidopsis Hop2 homolog	GO:0009628; GO:0007165; GO:0005829; GO:0009791; GO:0016301; GO:0004871; GO:0007275; GO:0000003; GO:0016043; GO:0007049; GO:0006950; GO:0006259; GO:0009719; GO:0009058; GO:0008152; GO:0005515; GO:0005634	response to abiotic stimulus; signal transduction; cytosol; post-embryonic development; kinase activity; signal transducer activity; multicellular organismal development; reproduction; cellular component organization; cell cycle; response to stress; DNA metabolic process; response to endogenous stimulus; biosynthetic process; metabolic process; protein binding; nucleus
OG_22738	P.002G061600	T60219	0.00220919	0.0421591	0.0524013	adenine phosphoribosyl transferase 3	GO:0005737; GO:0016740; GO:0006139; GO:0009058	cytoplasm; transferase activity; nucleobase-containing compound metabolic process; biosynthetic process
OG_23164	P.002G326000	T20005	0.00724237	0.138311	0.0523631	Expressed protein
OG_23565	P.008G041300	T14118	0.13025	2.52965	0.0514896	homeobox protein 30	GO:0003700; GO:0003677; GO:0005634; GO:0005622	sequence-specific DNA binding transcription factor activity; DNA binding; nucleus; intracellular
OG_22684	P.009G062800	T07669	0.0018231	0.0356029	0.0512065	Protein of unknown function, DUF617
OG_23300	P.006G085100	T06199	0.0036428	0.0751173	0.0484948	ARM repeat superfamily protein	GO:0005488	binding
OG_23063	P.001G099200	T09423	0.00670348	0.139683	0.0479905	Family of unknown function (DUF716)
OG_22633	P.001G190000	T06049	0.0025314	0.0539732	0.0469011	Transducin/WD40 repeat-like superfamily protein	GO:0005515; GO:0016043; GO:0009058; GO:0005829	protein binding; cellular component organization; biosynthetic process; cytosol
OG_23389	P.008G232800	T19325	0.00269267	0.0578121	0.0465763	Calcium-dependent lipid-binding (CaLB domain) family protein	GO:0005515	protein binding
OG_23363	P.011G042600	T26311	0.00853088	0.189193	0.0450908	basic leucine-zipper 44	GO:0003677; GO:0003700; GO:0009058; GO:0006139; GO:0005622	DNA binding; sequence-specific DNA binding transcription factor activity; biosynthetic process; nucleobase-containing compound metabolic process; intracellular
OG_22946	P.008G059200	T56427	0.00325031	0.0733151	0.0443334	Ribosomal L5P family protein	GO:0006412; GO:0005198; GO:0009058; GO:0009987; GO:0006629; GO:0009536; GO:0016020; GO:0005840; GO:0005829; GO:0008150	translation; structural molecule activity; biosynthetic process; cellular process; lipid metabolic process; plastid; membrane; ribosome; cytosol; biological_process
OG_23273	P.003G220300	T55256	0.00409785	0.0962848	0.0425597	Cwf15 / Cwc15 cell cycle control family protein	GO:0005634; GO:0006139	nucleus; nucleobase-containing compound metabolic process
OG_23584	P.004G146200	T59430	0.00786305	0.18498	0.0425074	homeobox protein 33	GO:0003677	DNA binding
OG_23371	P.006G062200	T30893	0.0025607	0.063433	0.0403686	nuclear factor Y, subunit A1	GO:0007275; GO:0009058; GO:0006139; GO:0000003; GO:0009791; GO:0009790; GO:0003677; GO:0005634; GO:0003700	multicellular organismal development; biosynthetic process; nucleobase-containing compound metabolic process; reproduction; post-embryonic development; embryo development; DNA binding; nucleus; sequence-specific DNA binding transcription factor activity
OG_22689	P.009G080200	T55172	0.00535593	0.142479	0.037591	17.6 kDa class II heat shock protein	GO:0006950	response to stress
OG_23035	P.006G126800	T23050	0.0020627	0.0610505	0.0337869	ABA Overly-Sensitive 5	GO:0009719; GO:0006139; GO:0005515	response to endogenous stimulus; nucleobase-containing compound metabolic process; protein binding
OG_22835	P.011G049300	T59353	0.00355494	0.111404	0.0319104	RING/U-box superfamily protein	GO:0006810; GO:0005488	transport; binding
OG_22720	P.002G024200	T05755	0.00281695	0.0906977	0.0310587	Expressed protein
OG_23167	P.002G320800	T70383	0.00232927	0.0956372	0.0243553	EF hand calcium-binding protein family	GO:0005488	binding
OG_23065	P.008G019700	T56614	0.00221524	0.0952858	0.0232483	Acyl-CoA N-acyltransferases (NAT) superfamily protein	GO:0005737; GO:0009058; GO:0009987; GO:0006629; GO:0009605; GO:0006950; GO:0009607; GO:0016740; GO:0006259; GO:0019538	cytoplasm; biosynthetic process; cellular process; lipid metabolic process; response to external stimulus; response to stress; response to biotic stimulus; transferase activity; DNA metabolic process; protein metabolic process
OG_23553	P.010G120800	T34332	0.0020187	0.0985354	0.020487	pyrophosphorylase 1	GO:0005829; GO:0009058; GO:0009987; GO:0008150; GO:0005488; GO:0016787; GO:0006139; GO:0016020; GO:0005634; GO:0006091	cytosol; biosynthetic process; cellular process; biological_process; binding; hydrolase activity; nucleobase-containing compound metabolic process; membrane; nucleus; generation of precursor metabolites and energy
OG_22881	P.009G020000	T56707	0.0022167	0.112061	0.0197812	sterol methyltransferase 2	GO:0016049; GO:0008152; GO:0007275; GO:0006259; GO:0009058; GO:0007049; GO:0016740; GO:0006629	cell growth; metabolic process; multicellular organismal development; DNA metabolic process; biosynthetic process; cell cycle; transferase activity; lipid metabolic process
OG_23557	P.008G033800	T38346	0.000883678	0.0514308	0.0171819	alpha-amylase-like 3	GO:0016787; GO:0005488; GO:0005975; GO:0009987	hydrolase activity; binding; carbohydrate metabolic process; cellular process
OG_22880	P.009G007300	T58347	0.00243405	0.149766	0.0162524	Expressed protein	GO:0006810; GO:0005215; GO:0016020; GO:0009536	transport; transporter activity; membrane; plastid

## Sheet: Table S3
Orthologous groups in red represent ω2 or ω > 1, LRT < 0.05 and BEB >95% with positive selection sites in both M1a vs M2a and M7 vs M8.
Orthologous_Groups	Ath_Ortholog_ID	M1a(neutral)			M2a(selection)				M7(beta)			M8(beta&w)				Reference_name	Protein_Function
		lnL	np	parameter	lnL	np	parameter	site	lnL	np	parameter	lnL	np	parameter	site
OG_9805	AT5G22800.1	-9086.59	15	p0=0.87026 p1=0.12974 ω0=0.06309 ω1=1.00000	-9070.37	17	p0=0.87620 p1=0.11009 p2=0.01371 ω0=0.06960 ω1=1.00000 ω2=9.30759	62N 89I 96L 128F 138Q	-9099.19	15	p0=0.16777 p1=0.73469	-9073.38	17	p0=0.97580 p1=0.02420 p=0.30021 q=1.71887 ω=5.53132	62N 89I 96L 128F 138Q	AT5G22800.1	probable alanine--tRNA ligase
OG_9947	AT3G19260.1	-3749.47	15	p0=0.69947 p1=0.30053 ω0=0.06912 ω1=1.00000	-3741.8	17	p0=0.68536 p1=0.29880 p2=0.01584 ω0=0.07322 ω1=1.00000 ω2=9.15627	320V 483Q	-3750.51	15	p0=0.12435 p1=0.23110	-3741.78	17	p0=0.98300 p1=0.01700 p=0.16631 q=0.32466 ω=8.64355	320V 480S 483Q	AT3G19260.1	LAG1 longevity assurance-like 2
OG_10941	AT1G18335.1	-2963.01	15	p0=0.77519 p1=0.22481 ω0=0.15699 ω1=1.00000	-2957.69	17	p0=0.77414 p1=0.21973 p2=0.00613 ω0=0.16272 ω1=1.00000 ω2=16.79514	21G	-2966.85	15	p0=0.53678 p1=1.03214	-2960.27	17	p0=0.99231 p1=0.00769 p=0.62105 q=1.24018 ω=14.65326	21G	AT1G18335.1	acyl-CoA N-acyltransferases-like protein
OG_10618	AT4G08685.1	-2035.13	15	p0=0.63386 p1=0.36614 ω0=0.10992 ω1=1.00000	-2030.62	17	p0=0.61309 p1=0.36519 p2=0.02173 ω0=0.11254 ω1=1.00000 ω2=5.12010	75W 106F	-2035.5	15	p0=0.31371 p1=0.46930	-2029.72	17	p0=0.97556 p1=0.02444 p=0.36902 q=0.58383 ω=4.59487	75W 106F	AT4G08685.1	protein SAH7
OG_9713	AT5G27395.2								-3162.31	15	p0=0.23548 p1=0.39053	-3153.93	17	p0=0.93537 p1=0.06463 p=0.46390 q=1.06346 ω=3.15551	92I 177V	AT5G27395.2	mitochondrial inner membrane translocase complex, subunit Tim44-related protein
OG_10037	AT1G31240.1								-3646.25	15	p0=0.25334 p1=0.18361	-3639.03	17	p0=0.94997 p1=0.05003 p=0.34415 q=0.26975 ω=3.95361	17P 127M	AT1G31240.1	Bromodomain transcription factor
OG_10186	AT1G09780.1								-4567.54	15	p0=0.11530 p1=0.68878	-4558.2	17	p0=0.97438 p1=0.02562 p=0.24601 q=2.20577 ω=3.16113	310V 348K 379A 516S	AT1G09780.1	2,3-bisphosphoglycerate-independent phosphoglycerate mutase 1
OG_10467	AT2G43110.1								-3453.1	15	p0=0.28591 p1=0.53782	-3448.49	17	p0=0.98862 p1=0.01138 p=0.30380 q=0.58816 ω=8.86567	32G	AT2G43110.1	uncharacterized protein
OG_10095	AT2G23840.1								-2870.11	15	p0=0.24265 p1=0.65537	-2866.25	17	p0=0.96704 p1=0.03296 p=0.49482 q=1.77638 ω=2.89915	100S	AT2G23840.1	HNH endonuclease
OG_10235	AT1G18190.1								-7311.52	15	p0=0.37872 p1=0.71075	-7304.24	17	p0=0.97781 p1=0.02219 p=0.53006 q=1.13934 ω=3.74979	243D 291H	AT1G18190.1	golgin candidate 2
OG_10350	AT5G02830.1								-7433.29	15	p0=0.29331 p1=0.50923	-7428.58	17	p0=0.97558 p1=0.02442 p=0.43493 q=0.88043 ω=3.40544	180F	AT5G02830.1	pentatricopeptide repeat-containing protein
OG_10623	AT1G07645.1								-1539.19	15	p0=0.20056 p1=0.65565	-1534.08	17	p0=0.86419 p1=0.13581 p=10.13482 q=99.00000 ω=1.54618	98P	AT1G07645.1	dessication-induced 1VOC-like protein
OG_10631	AT3G20420.1								-5212.64	15	p0=0.48187 p1=0.92335	-5208.27	17	p0=0.97908 p1=0.02092 p=0.55312 q=1.15015 ω=3.71563	323A	AT3G20420.1	RNAse THREE-like protein 2
OG_10744	AT2G38120.1								-4897.24	15	p0=0.10556 p1=0.96694	-4891.62	17	p0=0.99669 p1=0.00331 p=0.11639 q=1.18922 ω=64.21288	489L	AT2G38120.1	auxin transporter protein 1
OG_9360	AT1G09800.1								-5750.62	15	p0=0.19972 p1=0.49827	-5745.38	17	p0=0.98567 p1=0.01433 p=0.25060 q=0.68505 ω=4.56059	772N	AT1G09800.1	pseudouridine synthase family protein
OG_9471	AT3G05345.1								-2699.85	15	p0=0.29660 p1=0.52214	-2693.35	17	p0=0.93701 p1=0.06299 p=0.69971 q=1.76967 ω=2.87765	28R	AT3G05345.1	DNAJ heat shock N-terminal domain-containing protein
OG_9474	AT1G08960.1								-5609.57	15	p0=0.10770 p1=0.26290	-5605.94	17	p0=0.79543 p1=0.20457 p=0.50696 q=5.44208 ω=1.28243	309I 327I	AT1G08960.1	cation/calcium exchanger 5
OG_9589	AT5G13960.1								-7777.31	15	p0=0.15301 p1=0.43631	-7770.2	17	p0=0.95787 p1=0.04213 p=0.21172 q=0.78276 ω=3.22979	797D	AT5G13960.1	histone-lysine N-methyltransferase, H3 lysine-9 specific SUVH4
OG_9889	AT1G49975.1								-1363.29	15	p0=0.41774 p1=0.92695	-1360.05	17	p0=0.99206 p1=0.00794 p=0.51287 q=1.20733 ω=9.57522	53M	AT1G49975.1	uncharacterized protein
OG_10001	AT5G22050.2															AT5G22050.2	protein kinase family protein
OG_10002	AT4G15440.1															AT4G15440.1	hydroperoxide lyase 1
OG_10007	AT2G41250.1															AT2G41250.1	haloacid dehalogenase-like hydrolase domain-containing protein
OG_10009	AT2G41640.2															AT2G41640.2	Glycosyltransferase family 61 protein
OG_10010	AT4G10650.1															AT4G10650.1	P-loop containing nucleoside triphosphate hydrolases superfamily protein
OG_10011	AT3G12040.1															AT3G12040.1	DNA-3-methyladenine glycosylase
OG_10034	AT3G08000.1															AT3G08000.1	RNA recognition motif-containing protein
OG_10043	AT5G43880.1															AT5G43880.1	uncharacterized protein
OG_10044	AT5G02540.1															AT5G02540.1	NAD(P)-binding Rossmann-fold superfamily protein
OG_10057	AT2G48120.1															AT2G48120.1	protein PALE CRESS
OG_10061	AT1G04530.1															AT1G04530.1	carboxylate clamp-tetratricopeptide repeat protein
OG_10064	AT5G47680.1															AT5G47680.1	protein tRNA MODIFICATION 10
OG_10071	AT3G47000.1															AT3G47000.1	glycosyl hydrolase family protein
OG_10073	AT1G30520.1															AT1G30520.1	2-succinylbenzoate--CoA ligase
OG_10077	AT5G44520.1															AT5G44520.1	NagB/RpiA/CoA transferase-like superfamily protein
OG_10082	AT1G65440.3															AT1G65440.3	transcription elongation factor SPT6-like protein
OG_10083	AT5G19750.1															AT5G19750.1	Mpv17/PMP22 family protein
OG_10085	AT2G41120.1															AT2G41120.1	uncharacterized protein
OG_10086	AT3G56820.1															AT3G56820.1	uncharacterized protein
OG_10087	AT5G04200.1															AT5G04200.1	metacaspase 9
OG_10089	AT3G03630.1															AT3G03630.1	cysteine synthase 26
OG_10091	AT1G58030.1															AT1G58030.1	cationic amino acid transporter 2
OG_10094	AT1G64770.1															AT1G64770.1	NDH-dependent cyclic electron flow 1
OG_10102	AT4G02980.1															AT4G02980.1	auxin-binding protein 1
OG_10109	AT3G10340.1															AT3G10340.1	phenylalanine ammonia-lyase 4
OG_10111	AT2G39190.2															AT2G39190.2	ATH subfamily protein ATH8
OG_10112	AT2G19540.1															AT2G19540.1	transducin family protein / WD-40 repeat family protein
OG_10122	AT4G34660.1															AT4G34660.1	SH3 domain-containing protein
OG_10123	AT5G46420.1															AT5G46420.1	RimM-like 16S rRNA processing protein
OG_10124	AT2G43840.2															AT2G43840.2	UDP-glycosyltransferase 74 F1
OG_10132	AT4G24810.2															AT4G24810.2	protein kinase family protein
OG_10134	AT1G22730.1															AT1G22730.1	MA3 domain-containing protein
OG_10138	AT2G19080.1															AT2G19080.1	metaxin-related protein
OG_10142	AT3G08600.1															AT3G08600.1	uncharacterized protein
OG_10144	AT2G40610.1															AT2G40610.1	expansin A8
OG_10148	AT1G07080.1															AT1G07080.1	GILT domain-containing protein
OG_10161	AT2G26110.1															AT2G26110.1	uncharacterized protein
OG_10162	AT5G11840.1															AT5G11840.1	uncharacterized protein
OG_10163	AT1G64520.1															AT1G64520.1	26S proteasome non-ATPase regulatory subunit RPN12A
OG_10179	AT2G38420.1															AT2G38420.1	transacting siRNA generating locus
OG_10180	AT2G38500.1															AT2G38500.1	2-oxoglutarate (2OG) and Fe(II)-dependent oxygenase superfamily protein
OG_10181	AT3G51610.1															AT3G51610.1	membrane protein NO PRIMEXINE AND PLASMA MEMBRANE UNDULATION
OG_10183	AT1G32070.3															AT1G32070.3	acetyltransferase NSI
OG_10194	AT5G18950.1															AT5G18950.1	pentatricopeptide repeat-containing protein
OG_10200	AT5G27820.1															AT5G27820.1	ribosomal L18p/L5e family protein
OG_10202	AT5G11340.1															AT5G11340.1	GCN5-related N-acetyltransferase (GNAT) family protein
OG_10203	AT4G38370.1															AT4G38370.1	phosphoglycerate mutase-like protein
OG_10207	AT3G51420.1															AT3G51420.1	strictosidine synthase-like 4
OG_10210	AT5G66090.1															AT5G66090.1	uncharacterized protein
OG_10211	AT4G35930.1															AT4G35930.1	F-box protein
OG_10212	AT1G75900.1															AT1G75900.1	GDSL esterase/lipase EXL3
OG_10215	AT5G66230.1															AT5G66230.1	Chalcone-flavanone isomerase family protein
OG_10218	AT1G54150.1															AT1G54150.1	E3 ubiquitin ligase-like protein
OG_10222	AT1G72790.1															AT1G72790.1	hydroxyproline-rich glycoprotein family protein
OG_10228	AT1G79730.1															AT1G79730.1	protein early flowering 7
OG_10230	AT1G08500.1															AT1G08500.1	early nodulin-like protein 18
OG_10234	AT1G67940.1															AT1G67940.1	ABC transporter I family member 17
OG_10240	AT1G14810.1															AT1G14810.1	aspartate semialdehyde dehydrogenase
OG_10242	AT1G24620.1															AT1G24620.1	putative calcium-binding protein CML25
OG_10245	AT5G39360.1															AT5G39360.1	EID1-like F-box protein 2
OG_10247	AT5G15400.1															AT5G15400.1	putative ubiquitin conjugation factor E4
OG_10250	AT5G15330.1															AT5G15330.1	SPX domain-containing protein 4
OG_10251	AT3G28860.1															AT3G28860.1	ABC transporter B family member 19
OG_10255	AT5G40020.1															AT5G40020.1	pathogenesis-related thaumatin-like protein
OG_10261	AT5G45380.1															AT5G45380.1
OG_10262	AT4G19390.1															AT4G19390.1	uncharacterized protein
OG_10263	AT5G45360.1															AT5G45360.1	F-box protein SKIP31
OG_10265	AT1G31790.1															AT1G31790.1	pentatricopeptide repeat-containing protein
OG_10275	AT1G19690.1															AT1G19690.1	NAD(P)-binding Rossmann-fold superfamily protein
OG_10281	AT1G47510.1															AT1G47510.1	Type I inositol-1,4,5-trisphosphate 5-phosphatase 11
OG_10297	AT2G43360.1															AT2G43360.1	biotin synthase
OG_10305	AT1G10330.1															AT1G10330.1	pentatricopeptide repeat-containing protein
OG_10311	AT3G26090.1															AT3G26090.1	putative membrane receptor protein RGS1
OG_10312	AT1G67690.1															AT1G67690.1	zincin-like metalloproteases family protein
OG_10313	AT1G27300.1															AT1G27300.1	uncharacterized protein
OG_10315	AT4G13870.2															AT4G13870.2	Werner Syndrome-like exonuclease
OG_10316	AT5G39980.1															AT5G39980.1	pentatricopeptide repeat-containing protein
OG_10318	AT5G45580.1															AT5G45580.1	homeodomain-like superfamily protein
OG_10319	AT2G35540.1															AT2G35540.1	DNAJ heat shock N-terminal domain-containing protein >gi
OG_10320	AT5G46910.1															AT5G46910.1	lysine-specific demethylase REF6
OG_10321	AT5G46860.1															AT5G46860.1	syntaxin-22
OG_10325	AT5G65540.1															AT5G65540.1	uncharacterized protein
OG_10330	AT1G79220.1															AT1G79220.1	mitochondrial transcription termination factor family protein
OG_10331	AT5G48460.1															AT5G48460.1	Actin binding Calponin homology (CH) domain-containing protein
OG_10339	AT5G16880.3															AT5G16880.3	Target of Myb protein 1
OG_10341	AT4G14890.1															AT4G14890.1	ferredoxin C1
OG_10342	AT3G22450.1															AT3G22450.1	ribosomal L18p/L5e family protein
OG_10343	AT1G50030.1															AT1G50030.1	serine/threonine-protein kinase TOR
OG_10344	AT2G14660.1															AT2G14660.1	uncharacterized protein
OG_10358	AT5G06430.1															AT5G06430.1	thioredoxin-related protein
OG_10359	AT3G23400.1															AT3G23400.1	FIBRILLIN 4
OG_10375	AT5G05520.1															AT5G05520.1	outer membrane OMP85 family protein
OG_10376	AT3G11090.1															AT3G11090.1	LOB domain-containing protein 21
OG_10377	AT3G11110.1															AT3G11110.1	RING-H2 finger protein ATL66
OG_10378	AT3G11150.1															AT3G11150.1	2-oxoglutarate (2OG) and Fe(II)-dependent oxygenase superfamily protein
OG_10381	AT3G47080.1															AT3G47080.1	tetratricopeptide repeat domain-containing protein
OG_10385	AT1G21770.1															AT1G21770.1	acyltransferase-like protein
OG_10386	AT1G21760.1															AT1G21760.1	F-box protein 7
OG_10387	AT1G21790.1															AT1G21790.1	TRAM, LAG1 and CLN8 (TLC) lipid-sensing domain containing protein
OG_10394	AT3G13200.1															AT3G13200.1	protein embryo defective 2769
OG_10395	AT4G17370.1															AT4G17370.1	Oxidoreductase family protein
OG_10399	AT5G46580.1															AT5G46580.1	pentatricopeptide repeat-containing protein
OG_10400	AT1G32520.1															AT1G32520.1	uncharacterized protein
OG_10402	AT1G16900.1															AT1G16900.1	Dol-P-Man:Man(6)GlcNAc(2)-PP-Dol alpha-1,2-mannosyltransferase
OG_10405	AT1G16920.1															AT1G16920.1	Ras-related protein RABA1b
OG_10409	AT4G29010.1															AT4G29010.1	fatty acid beta-oxidation multifunctional protein AIM1
OG_10413	AT1G49050.1															AT1G49050.1	aspartyl protease
OG_10428	AT3G51270.1															AT3G51270.1	protein serine/threonine kinase
OG_10440	AT1G79870.1															AT1G79870.1	glyoxylate/hydroxypyruvate reductase A HPR2
OG_10442	AT2G38440.1															AT2G38440.1	WAVE complex SCAR2
OG_10444	AT1G04390.1															AT1G04390.1	BTB/POZ domain-containing protein
OG_10448	AT2G26260.1															AT2G26260.1	3beta-hydroxysteroid-dehydrogenase/decarboxylase isoform 2
OG_10449	AT1G06110.1															AT1G06110.1	F-box protein SKIP16
OG_10459	AT3G09210.1															AT3G09210.1	plastid transcriptionally active 13
OG_10462	AT3G12685.1															AT3G12685.1	acid phosphatase/vanadium-dependent haloperoxidase-related protein
OG_10477	AT2G32280.1															AT2G32280.1	uncharacterized protein
OG_10479	AT3G21870.1															AT3G21870.1	cyclin p2;1
OG_10484	AT5G58920.1															AT5G58920.1	uncharacterized protein
OG_10487	AT2G18410.1															AT2G18410.1	uncharacterized protein
OG_10495	AT5G60590.2															AT5G60590.2	DHBP synthase RibB-like alpha/beta domain-containing protein
OG_10497	AT1G07970.1															AT1G07970.1	uncharacterized protein
OG_10498	AT2G27800.1															AT2G27800.1	pentatricopeptide repeat-containing protein
OG_10499	AT2G28510.1															AT2G28510.1	Dof zinc finger protein DOF2.1
OG_10503	AT5G14180.1															AT5G14180.1	Myzus persicae-induced lipase 1
OG_10505	AT5G14210.1															AT5G14210.1	putative inactive leucine-rich repeat receptor-like protein kinase
OG_10518	AT2G40600.1															AT2G40600.1	appr-1-p processing enzyme family protein
OG_10519	AT1G58350.3															AT1G58350.3	protein ZW18 >gi
OG_10524	AT1G64080.1															AT1G64080.1	membrane-associated kinase regulator 2
OG_10525	AT1G64380.1															AT1G64380.1	ethylene-responsive transcription factor ERF061
OG_10529	AT1G71500.1															AT1G71500.1	Rieske (2Fe-2S) domain-containing protein
OG_10530	AT4G25340.1															AT4G25340.1	peptidyl-prolyl cis-trans isomerase FKBP53
OG_10532	AT2G01590.1															AT2G01590.1	chlororespiratory reduction 3
OG_10537	AT1G06530.1															AT1G06530.1	peroxisomal and mitochondrial division factor2
OG_10538	AT5G16550.1															AT5G16550.1	uncharacterized protein
OG_10539	AT4G02485.1															AT4G02485.1	oxidoreductase, 2OG-Fe(II) oxygenase family protein
OG_10546	AT3G47610.1															AT3G47610.1	transcription regulator/ zinc ion binding protein
OG_10550	AT3G22990.1															AT3G22990.1	armadillo-repeat containing protein LFR
OG_10551	AT5G43750.1															AT5G43750.1	NAD(P)H dehydrogenase 18
OG_10558	AT2G29660.1															AT2G29660.1	uncharacterized protein
OG_10563	AT3G02700.1															AT3G02700.1	NC domain-containing protein-related
OG_10564	AT2G27100.1															AT2G27100.1	serrate RNA effector molecule
OG_10576	AT4G20310.2															AT4G20310.2	peptidase M50 family protein
OG_10585	AT1G12244.1															AT1G12244.1	polynucleotidyl transferase, ribonuclease H-like superfamily protein
OG_10586	AT1G17330.1															AT1G17330.1	Metal-dependent phosphohydrolase
OG_10594	AT5G56740.1															AT5G56740.1	histone acetyltransferase type B catalytic subunit
OG_10598	AT1G11890.1															AT1G11890.1	vesicle transport protein SEC22
OG_10600	AT3G46780.1															AT3G46780.1	protein plastid transcriptionally active 16
OG_10601	AT5G47580.1															AT5G47580.1	uncharacterized protein
OG_10602	AT4G16510.1															AT4G16510.1	YbaK/aminoacyl-tRNA synthetase-associated domain-containing protein
OG_10630	AT5G55130.2															AT5G55130.2	adenylyltransferase and sulfurtransferase MOCS3
OG_10639	AT4G12970.1															AT4G12970.1	epidermal patterning factor-like protein 9
OG_10644	AT2G37000.1															AT2G37000.1	transcription factor TCP11
OG_10648	AT3G60300.1															AT3G60300.1	RWD domain-containing protein
OG_10652	AT5G58440.1															AT5G58440.1	sorting nexin 2A
OG_10668	AT1G80920.1															AT1G80920.1	chaperone protein dnaJ 8
OG_10671	AT1G27050.1															AT1G27050.1
OG_10672	AT1G10380.1															AT1G10380.1	putative membrane lipoprotein
OG_10673	AT2G46710.1															AT2G46710.1	Rho GTPase activating protein with PAK-box/P21-Rho-binding domain
OG_10677	AT3G13235.3															AT3G13235.3	DNA damage-inducible protein 1
OG_10684	AT1G04985.1															AT1G04985.1	uncharacterized protein
OG_10685	AT5G35670.1															AT5G35670.1	protein IQ-domain 33
OG_10688	AT2G38730.1															AT2G38730.1	cyclophilin-like peptidyl-prolyl cis-trans isomerase family protein
OG_10689	AT3G01800.1															AT3G01800.1	ribosome recycling factor
OG_10690	AT3G17660.1															AT3G17660.1	putative ADP-ribosylation factor GTPase-activating protein AGD15
OG_10695	AT3G18165.1															AT3G18165.1	modifier of snc1,4
OG_10702	AT5G58130.1															AT5G58130.1	protein REPRESSOR OF SILENCING 3
OG_10704	AT1G15440.2															AT1G15440.2	periodic tryptophan protein 2
OG_10705	AT1G26340.1															AT1G26340.1	cytochrome B5 isoform A
OG_10714	AT4G24090.1															AT4G24090.1	uncharacterized protein
OG_10716	AT1G26940.1															AT1G26940.1	Cyclophilin-like peptidyl-prolyl cis-trans isomerase family protein
OG_10730	AT1G11680.1															AT1G11680.1	sterol 14-demethylase
OG_10731	AT1G12790.1															AT1G12790.1	protein PTD
OG_10735	AT4G28210.1															AT4G28210.1	embryo defective 1923 protein
OG_10738	AT3G07800.1															AT3G07800.1	thymidine kinase
OG_10746	AT1G74120.1															AT1G74120.1	mitochondrial transcription termination factor family protein
OG_10750	AT3G53970.1															AT3G53970.1	probable proteasome inhibitor
OG_10751	AT3G54000.1															AT3G54000.1	uncharacterized protein
OG_10752	AT4G21520.1															AT4G21520.1	WD40 repeat family protein
OG_10753	AT3G56840.1															AT3G56840.1	FAD-dependent oxidoreductase-like protein
OG_10756	AT2G31040.1															AT2G31040.1	ATP synthase protein I-related protein
OG_10757	AT2G42620.1															AT2G42620.1	F-box leucine-rich repeat family protein MAX2
OG_10760	AT5G08540.1															AT5G08540.1	uncharacterized protein
OG_10761	AT1G50370.1															AT1G50370.1	phytochrome-associated serine/threonine protein phosphatase 1
OG_10764	AT1G24095.1															AT1G24095.1	putative thiol-disulfide oxidoreductase DCC
OG_10765	AT1G24030.1															AT1G24030.1	protein kinase
OG_10766	AT1G02260.1															AT1G02260.1	divalent ion symporter
OG_10770	AT3G10030.1															AT3G10030.1	aspartate/glutamate/uridylate kinase family protein
OG_10776	AT4G09750.1															AT4G09750.1	Rossmann-fold NAD(P)-binding domain-containing protein
OG_10778	AT1G60000.1															AT1G60000.1	RNA recognition motif-containing protein
OG_10779	AT1G67570.1															AT1G67570.1	uncharacterized protein
OG_10789	AT5G40950.1															AT5G40950.1	50S ribosomal protein L27
OG_10793	AT5G02310.1															AT5G02310.1	proteolysis 6
OG_10799	AT1G04555.1															AT1G04555.1	uncharacterized protein
OG_10801	AT3G14750.1															AT3G14750.1	uncharacterized protein
OG_10802	AT2G44420.1															AT2G44420.1	protein N-terminal asparagine amidohydrolase family protein
OG_10806	AT1G13330.1															AT1G13330.1	homologous-pairing protein 2-like protein
OG_10810	AT3G55070.2															AT3G55070.2	LisH/CRA/RING-U-box domain-containing protein
OG_10813	AT5G12320.1															AT5G12320.1	ankyrin repeat-containing protein
OG_10815	AT3G13450.1															AT3G13450.1	branched chain alpha-keto acid dehydrogenase E1 beta
OG_10817	AT5G55500.1															AT5G55500.1	beta-(1,2)-xylosyltransferase
OG_10819	AT1G71950.1															AT1G71950.1	Proteinase inhibitor, propeptide
OG_10820	AT3G63510.1															AT3G63510.1	FMN-linked oxidoreductases superfamily protein
OG_10829	AT3G29010.1															AT3G29010.1	biotin/lipoate A/B protein ligase family protein
OG_10831	AT2G34620.1															AT2G34620.1	mitochondrial transcription termination factor family protein
OG_10838	AT4G23890.1															AT4G23890.1	protein CHLORORESPIRATORY REDUCTION 31
OG_10839	AT3G08490.1															AT3G08490.1	uncharacterized protein
OG_10840	AT5G13720.1															AT5G13720.1	uncharacterized protein
OG_10841	AT4G00050.1															AT4G00050.1	transcription factor UNE10
OG_10844	AT1G15980.1															AT1G15980.1	NAD(P)H dehydrogenase subunit 48
OG_10851	AT3G08550.1															AT3G08550.1	protein elongation defective 1
OG_10852	AT4G31560.1															AT4G31560.1	high chlorophyll fluorescence 153 protein
OG_10870	ATCG00790.1															ATCG00790.1	ribosomal protein L16
OG_10872	AT5G13970.1															AT5G13970.1	uncharacterized protein
OG_10873	AT3G26760.1															AT3G26760.1	Rossmann-fold NAD(P)-binding domain-containing protein
OG_10874	AT5G25752.1															AT5G25752.1	rhomboid-like protein 11
OG_10882	AT2G23470.1															AT2G23470.1	protein ROOT UV-B SENSITIVE 4
OG_10889	AT2G25720.1															AT2G25720.1	uncharacterized protein
OG_10899	AT1G18440.1															AT1G18440.1	peptidyl-tRNA hydrolase
OG_10900	AT1G73920.2															AT1G73920.2	alpha/beta-hydrolase domain-containing protein
OG_10914	AT1G27430.1															AT1G27430.1	GYF domain-containing protein
OG_10915	AT3G09430.1															AT3G09430.1	uncharacterized protein
OG_10916	AT5G60840.1															AT5G60840.1	uncharacterized protein
OG_10924	AT5G20140.2															AT5G20140.2	SOUL heme-binding protein
OG_10927	AT5G06170.1															AT5G06170.1	sucrose transport protein SUC9
OG_10929	AT5G13410.1															AT5G13410.1	putative FKBP-type peptidyl-prolyl cis-trans isomerase 7
OG_10935	AT5G64250.1															AT5G64250.1	Aldolase-type TIM barrel family protein
OG_8076	AT3G11830.1															AT3G11830.1	TCP-1/cpn60 chaperonin family protein
OG_8227	AT5G14850.2															AT5G14850.2	Alg9-like mannosyltransferase family
OG_8934	AT3G17820.1															AT3G17820.1	glutamine synthetase cytosolic isozyme 1-3
OG_9045	AT2G21960.1															AT2G21960.1	uncharacterized protein
OG_9046	AT1G56180.1															AT1G56180.1	uncharacterized protein
OG_9107	AT1G20930.1															AT1G20930.1	cyclin-dependent kinase B2-2
OG_9363	AT1G60870.1															AT1G60870.1	maternal effect embryo arrest 9 protein
OG_9371	AT5G09730.1															AT5G09730.1	beta-xylosidase 3
OG_9381	AT2G04305.1															AT2G04305.1	Magnesium transporter CorA-like family protein
OG_9383	AT3G25660.1															AT3G25660.1	amidase family protein
OG_9384	AT5G64510.1															AT5G64510.1	protein TUNICAMYCIN INDUCED 1
OG_9385	AT2G14260.2															AT2G14260.2	proline iminopeptidase
OG_9387	AT4G03270.1															AT4G03270.1	cyclin D6-1
OG_9392	AT4G04955.1															AT4G04955.1	allantoinase
OG_9397	AT1G28510.1															AT1G28510.1	Optic atrophy 3 protein (OPA3)
OG_9398	AT1G28690.1															AT1G28690.1	pentatricopeptide repeat-containing protein
OG_9404	AT3G62540.1															AT3G62540.1	pentatricopeptide repeat-containing protein
OG_9406	AT1G29800.2															AT1G29800.2	RING/FYVE/PHD zinc finger-containing protein
OG_9409	AT5G46550.1															AT5G46550.1	DNA-binding bromodomain-containing protein
OG_9410	AT2G25950.1															AT2G25950.1	uncharacterized protein
OG_9411	AT2G34640.1															AT2G34640.1	plastid transcriptionally active 12
OG_9412	AT3G25210.1															AT3G25210.1	pentatricopeptide repeat-containing protein
OG_9420	AT1G49470.1															AT1G49470.1	uncharacterized protein
OG_9426	AT4G04180.1															AT4G04180.1	P-loop containing nucleoside triphosphate hydrolases superfamily protein
OG_9428	AT4G22340.1															AT4G22340.1	cytidinediphosphate diacylglycerol synthase 2
OG_9431	AT5G03455.1															AT5G03455.1	dual specificity phosphatase Cdc25
OG_9437	AT5G03870.1															AT5G03870.1	Glutaredoxin family protein
OG_9447	AT4G03140.1															AT4G03140.1	NAD(P)-binding Rossmann-fold superfamily protein
OG_9449	AT1G02970.1															AT1G02970.1	Wee1-like protein kinase
OG_9450	AT2G47770.1															AT2G47770.1	tryptophan-rich sensory protein-like protein
OG_9451	AT4G02440.1															AT4G02440.1	phytochrome A-associated F-box protein EID1
OG_9452	AT1G02700.1															AT1G02700.1	uncharacterized protein
OG_9454	AT2G47390.1															AT2G47390.1	probable glutamyl endopeptidase
OG_9456	AT4G01940.1															AT4G01940.1	NifU-like protein 1
OG_9458	AT3G62190.1															AT3G62190.1	chaperone DnaJ domain-containing protein
OG_9460	AT4G01720.1															AT4G01720.1	putative WRKY transcription factor 47
OG_9461	AT3G62030.3															AT3G62030.3	peptidyl-prolyl cis-trans isomerase CYP20-3
OG_9467	AT3G63140.1															AT3G63140.1	chloroplast stem-loop binding protein-41
OG_9477	AT5G27290.1															AT5G27290.1	uncharacterized protein
OG_9478	AT3G04970.2															AT3G04970.2	DHHC-type zinc finger-containing protein
OG_9479	AT3G04950.1															AT3G04950.1	uncharacterized protein
OG_9482	AT1G54520.1															AT1G54520.1	uncharacterized protein
OG_9495	AT2G46735.1															AT2G46735.1	uncharacterized protein
OG_9498	AT1G01630.1															AT1G01630.1	protein sec fourteen-like protein-20
OG_9506	AT5G05810.1															AT5G05810.1	RING-H2 finger protein ATL43
OG_9508	AT5G44250.1															AT5G44250.1	uncharacterized protein
OG_9511	AT3G46630.1															AT3G46630.1	uncharacterized protein
OG_9513	AT5G65860.2															AT5G65860.2	ankyrin repeat family protein
OG_9514	AT4G37630.2															AT4G37630.2	cyclin-D5-1
OG_9519	AT2G43420.1															AT2G43420.1	3beta-hydroxysteroid-dehydrogenase/decarboxylase isoform 3
OG_9520	AT5G10730.1															AT5G10730.1	Rossmann-fold NAD(P)-binding domain-containing protein
OG_9524	AT5G15450.1															AT5G15450.1	chaperone protein ClpB3
OG_9525	AT5G11000.1															AT5G11000.1	uncharacterized protein
OG_9528	AT5G11270.1															AT5G11270.1	overexpressor of cationic peroxidase 3
OG_9529	AT5G11280.1															AT5G11280.1	uncharacterized protein
OG_9536	AT4G31340.1															AT4G31340.1	myosin heavy chain-related protein
OG_9541	AT5G11650.1															AT5G11650.1	alpha/beta fold hydrolase family protein
OG_9544	AT3G51320.1															AT3G51320.1	pentatricopeptide repeat-containing protein
OG_9545	AT1G75850.1															AT1G75850.1	vacuolar protein sorting-associated protein 35B
OG_9549	AT4G38630.1															AT4G38630.1	26S proteasome non-ATPase regulatory subunit 4
OG_9559	AT2G18350.1															AT2G18350.1	homeobox protein 24
OG_9562	AT3G50685.1															AT3G50685.1	uncharacterized protein
OG_9565	AT5G66631.1															AT5G66631.1	pentatricopeptide repeat-containing protein
OG_9566	AT4G37130.1															AT4G37130.1	hydroxyproline-rich glycoprotein family protein
OG_9570	AT3G19420.1															AT3G19420.1	phosphatase PTEN2
OG_9574	AT1G64960.1															AT1G64960.1	protein HYPERSENSITIVE TO EXCESS BORON 1
OG_9579	AT2G22790.1															AT2G22790.1	uncharacterized protein
OG_9580	AT1G60780.1															AT1G60780.1	protein HAPLESS 13
OG_9582	AT1G32440.1															AT1G32440.1	plastidial pyruvate kinase 3
OG_9588	AT5G41150.2															AT5G41150.2	DNA repair endonuclease UVH1
OG_9590	AT4G17540.1															AT4G17540.1	uncharacterized protein
OG_9592	AT4G16760.1															AT4G16760.1	acyl-CoA oxidase 5
OG_9594	AT4G12060.1															AT4G12060.1	Double Clp-N motif protein
OG_9595	AT4G11650.1															AT4G11650.1	osmotin-like protein OSM34
OG_9612	AT1G04580.1															AT1G04580.1	aldehyde oxidase 4
OG_9615	AT5G12940.1															AT5G12940.1	leucine-rich repeat-containing protein
OG_9623	AT1G54280.1															AT1G54280.1	ATPase E1-E2 type family protein / haloacid dehalogenase-like hydrolase family protein
OG_9627	AT3G13780.1															AT3G13780.1	SMAD/FHA domain-containing protein
OG_9631	AT4G29220.1															AT4G29220.1	6-phosphofructokinase 1
OG_9639	AT3G57350.1															AT3G57350.1	Nup93/Nic96 nucleoporin interacting component-containing protein
OG_9640	AT1G52590.1															AT1G52590.1	putative thiol-disulfide oxidoreductase DCC
OG_9646	AT4G15910.1															AT4G15910.1	late embryogenesis abundant 3-like protein
OG_9650	AT3G16990.1															AT3G16990.1	heme oxygenase-like, multi-helical protein
OG_9651	AT4G03430.1															AT4G03430.1	pre-mRNA-processing factor 6-like protein STA1
OG_9653	AT4G16130.1															AT4G16130.1	arabinose kinase 1
OG_9657	AT5G20850.1															AT5G20850.1	DNA repair protein RAD51-like 1
OG_9660	AT3G17210.1															AT3G17210.1	heat stable protein 1
OG_9667	AT4G29890.1															AT4G29890.1	putative choline monooxygenase
OG_9672	AT5G57460.1															AT5G57460.1	uncharacterized protein
OG_9675	AT5G57660.1															AT5G57660.1	zinc finger protein CONSTANS-LIKE 5
OG_9676	AT1G07200.2															AT1G07200.2	protein SMAX1-like 6
OG_9678	AT4G30840.1															AT4G30840.1	transducin/WD40 domain-containing protein
OG_9679	AT2G39440.1															AT2G39440.1	ribonuclease H2 subunit C domain-containing protein
OG_9681	AT5G13510.1															AT5G13510.1	ribosomal protein L10
OG_9685	AT4G04670.1															AT4G04670.1	Met-10+ like family protein / kelch repeat-containing protein
OG_9689	AT4G03960.1															AT4G03960.1	atypical dual-specificity phosphatase 4
OG_9690	AT4G05530.1															AT4G05530.1	short-chain dehydrogenase/reductase A
OG_9697	AT3G62580.1															AT3G62580.1	Late embryogenesis abundant protein (LEA) family protein
OG_9703	AT3G09410.1															AT3G09410.1	putative pectinacetylesterase
OG_9704	AT5G03560.2															AT5G03560.2	pentatricopeptide repeat-containing protein
OG_9707	AT1G56345.1															AT1G56345.1	RNA pseudourine synthase 1
OG_9709	AT5G27030.1															AT5G27030.1	Topless-related protein 3
OG_9715	AT5G27330.1															AT5G27330.1	Prefoldin chaperone subunit family protein
OG_9736	AT5G53540.1															AT5G53540.1	P-loop containing nucleoside triphosphate hydrolases superfamily protein
OG_9737	AT5G54180.1															AT5G54180.1	plastid transcriptionally active protein 15
OG_9744	AT2G22010.1															AT2G22010.1	E3 ubiquitin-protein ligase RKP
OG_9745	AT4G39520.1															AT4G39520.1	developmentally regulated G-protein
OG_9753	AT4G33460.1															AT4G33460.1	ABC transporter I family member 10
OG_9759	AT4G32915.1															AT4G32915.1	uncharacterized protein
OG_9761	AT4G10110.1															AT4G10110.1	RNA recognition motif-containing protein
OG_9764	AT1G76850.1															AT1G76850.1	exocyst complex component sec5
OG_9773	AT1G21090.1															AT1G21090.1	uncharacterized protein
OG_9776	AT5G52880.1															AT5G52880.1	F-box protein
OG_9779	AT4G25570.1															AT4G25570.1	transmembrane ascorbate ferrireductase 1
OG_9781	AT2G17265.1															AT2G17265.1	homoserine kinase
OG_9787	AT5G51880.1															AT5G51880.1	iron ion binding / oxidoreductase
OG_9789	AT5G51700.1															AT5G51700.1
OG_9798	AT2G42490.1															AT2G42490.1	copper amine oxidase family protein
OG_9804	AT3G08940.2															AT3G08940.2	light harvesting complex photosystem II interacting protein Lhcb4.2
OG_9807	AT5G17670.1															AT5G17670.1	hydrolase-like protein
OG_9808	AT3G48730.1															AT3G48730.1	glutamate-1-semialdehyde 2,1-aminomutase 2
OG_9811	AT2G20980.1															AT2G20980.1	minichromosome maintenance protein 10
OG_9812	AT2G16630.1															AT2G16630.1	Pollen Ole e 1 allergen and extensin family protein
OG_9813	AT4G34730.1															AT4G34730.1	ribosome-binding factor A
OG_9819	AT4G34460.3															AT4G34460.3	guanine nucleotide-binding protein subunit beta
OG_9822	AT1G20670.1															AT1G20670.1	DNA-binding bromodomain-containing protein
OG_9825	AT4G38390.1															AT4G38390.1	protein root hair specific 17
OG_9831	AT4G35790.2															AT4G35790.2	phospholipase D delta
OG_9836	AT1G75530.1															AT1G75530.1	Forkhead-associated (FHA) domain-containing protein
OG_9845	AT1G58290.1															AT1G58290.1	glutamyl-tRNA reductase 1
OG_9857	AT1G09815.1															AT1G09815.1	DNA polymerase delta subunit 4
OG_9860	AT4G31740.1															AT4G31740.1	sec1/munc18-like (SM) family protein
OG_9861	AT3G26420.1															AT3G26420.1	zinc finger-containing glycine-rich RNA-binding protein
OG_9864	AT2G22570.1															AT2G22570.1	nicotinamidase 1
OG_9870	AT2G29690.1															AT2G29690.1	anthranilate synthase component I-2
OG_9871	AT5G23290.1															AT5G23290.1	prefoldin subunit 5
OG_9892	AT1G63410.1															AT1G63410.1	LURP-one-related 11 protein
OG_9903	AT5G35360.1															AT5G35360.1	biotin carboxylase subunit CAC2
OG_9904	AT3G10700.1															AT3G10700.1	galacturonic acid kinase
OG_9906	AT4G29530.1															AT4G29530.1	pyridoxal phosphate phosphatase-related protein
OG_9908	AT4G29120.1															AT4G29120.1	6-phosphogluconate dehydrogenase family protein
OG_9909	AT2G19870.1															AT2G19870.1	tRNA/rRNA methyltransferase (SpoU) family protein
OG_9911	AT5G51130.1															AT5G51130.1	probable RNA methyltransferase
OG_9913	AT4G29080.1															AT4G29080.1	phytochrome-associated protein 2
OG_9916	AT5G13200.1															AT5G13200.1	GRAM domain family protein
OG_9919	AT2G20930.1															AT2G20930.1	sedlin-N conserved region-containing protein
OG_9922	AT4G19860.1															AT4G19860.1	calcium-independent phospholipase A
OG_9923	AT3G03330.1															AT3G03330.1	Rossmann-fold NAD(P)-binding domain-containing protein
OG_9926	AT5G36230.1															AT5G36230.1	C-terminal W2 domain of eIF4-gamma/eIF5/eIF2b-epsilon-containing protein
OG_9927	AT5G16520.1															AT5G16520.1	uncharacterized protein
OG_9928	AT1G31800.1															AT1G31800.1	protein LUTEIN DEFICIENT 5
OG_9929	AT3G53130.1															AT3G53130.1	carotene epsilon-monooxygenase
OG_9930	AT4G01250.1															AT4G01250.1	WRKY transcription factor 22
OG_9932	AT4G01310.1															AT4G01310.1	50S ribosomal protein L5
OG_9940	AT2G38840.1															AT2G38840.1	Guanylate-binding protein
OG_9943	AT3G59690.1															AT3G59690.1	protein IQ-domain 13
OG_9948	AT4G34050.1															AT4G34050.1	putative caffeoyl-CoA O-methyltransferase
OG_9950	AT1G71000.1															AT1G71000.1	chaperone DnaJ-domain containing protein
OG_9953	AT1G31160.1															AT1G31160.1	histidine triad nucleotide-binding 2 protein
OG_9955	AT1G21065.1															AT1G21065.1	uncharacterized protein
OG_9957	AT1G10180.1															AT1G10180.1	uncharacterized protein
OG_9958	AT2G04340.1															AT2G04340.1	uncharacterized protein
OG_9960	AT4G38260.1															AT4G38260.1	uncharacterized protein
OG_9961	AT2G03480.2															AT2G03480.2	QUASIMODO2 like 2
OG_9963	AT1G18520.1															AT1G18520.1	tetraspanin11
OG_9976	AT5G20280.1															AT5G20280.1	sucrose phosphate synthase 1F
OG_9983	AT4G15520.1															AT4G15520.1	tRNA/rRNA methyltransferase (SpoU) family protein
OG_9999	AT2G27500.1															AT2G27500.1	putative glucan endo-1,3-beta-glucosidase

## Sheet: Table S4
Orthologous groups in red represent ω > 1 (positive selection).
OG ID	P.vulgaris	P. lunatus	Ka	Ks	ω	KO_ID	Pathway
OG_23307	P.011G049500	T55730	0.0192622	0.00571059	3.37306
OG_22954	P.003G058300	T58440	0.0201437	0.00603293	3.33896
OG_22685	P.009G064900	T21210	0.0134987	0.00517628	2.6078	K08911	ko00196 Photosynthesis - antenna proteins
OG_23220	P.009G231100	T36159	0.0393994	0.020082	1.96193
OG_23367	P.007G280100	T06676	0.0126707	0.00686627	1.84535
OG_22891	P.002G201100	T34966	0.0219417	0.0131837	1.6643	K03505	ko00230 Purine metabolism	ko00240 Pyrimidine metabolism	ko03030 DNA replication	ko03410 Base excision repair	ko03420 Nucleotide excision repair	ko03430 Mismatch repair	ko03440 Homologous recombination
OG_22648	P.001G213600	T06201	0.0359011	0.0233721	1.53606
OG_23443	P.002G067300	T44961	0.0177821	0.0124053	1.43342
OG_23578	P.006G021300	T28309	0.0229841	0.0172994	1.32861
OG_23581	P.002G221700	T59158	0.0225017	0.0174262	1.29126
OG_23276	P.011G003700	T10020	0.327421	0.260403	1.25736
OG_23464	P.003G045300	T55494	0.0190676	0.0152012	1.25435	K08901	ko00195 Photosynthesis
OG_23031	P.006G133800	T17683	0.0419058	0.0393742	1.0643	K08472
OG_23327	P.008G263400	T56300	0.0236856	0.0224347	1.05576
OG_23093	P.006G072600	T56262	0.0418907	0.0399011	1.04986
OG_22637	P.001G194300	T15239	0.0253206	0.0255318	0.991728
OG_23159	P.002G330100	T14528	0.0395053	0.0403053	0.980153
OG_23086	P.008G170300	T18818	0.0181131	0.0189289	0.956901
OG_23066	P.007G168600	T57342	0.0191523	0.0203448	0.941383
OG_22983	P.005G092700	T41394	0.044837	0.0486074	0.922432
OG_23527	P.010G158900	T12161	0.0670324	0.0737964	0.908343
OG_23349	P.002G035100	T68971	0.047424	0.0525079	0.903179
OG_23588	P.010G159900	T08368	0.0182557	0.0202509	0.901477
OG_23149	P.010G130100	T40120	0.0367957	0.0424468	0.866866
OG_23630	P.011G162300	T34491	0.021854	0.026054	0.838795	K08073
OG_23213	P.001G262900	T31870	0.0481641	0.0579291	0.831433
OG_23425	P.011G190700	T33278	0.0256864	0.0312944	0.820801
OG_22806	P.007G147000	T40530	0.013183	0.0162702	0.810258	K03452
OG_22895	P.002G211500	T55943	0.0166697	0.0207137	0.804769
OG_22660	P.006G090100	T37635	0.0256415	0.0330592	0.775625
OG_23442	P.010G162600	T55054	0.0846708	0.110044	0.769427
OG_22664	P.006G094900	T07801	0.0124978	0.0162837	0.767505
OG_22686	P.009G065200	T22339	0.00871393	0.0116002	0.751186
OG_22681	P.009G036700	T09332	0.0283562	0.0381696	0.7429	K10395
OG_22712	P.002G167300	T60051	0.0218467	0.0298625	0.731579	K14191
OG_23005	P.009G175900	T16472	0.015394	0.0215296	0.715016
OG_23357	P.001G228000	T07090	0.0116525	0.0163494	0.712714
OG_22603	P.006G198100	T56836	0.014034	0.0197545	0.71042	K01259	ko00330 Arginine and proline metabolism
OG_23606	P.010G094000	T26913	0.0099992	0.0142338	0.702498
OG_23098	P.008G152900	T38583	0.0408091	0.0581743	0.701498
OG_23324	P.005G113500	T21392	0.0240708	0.0350503	0.686749
OG_23187	P.002G115200	T31457	0.0215462	0.0315092	0.683806
OG_23291	P.004G079500	T59283	0.0217087	0.0318473	0.68165
OG_23528	P.006G046000	T44378	0.0166952	0.0246262	0.677944	K13993	ko04141 Protein processing in endoplasmic reticulum
OG_23585	P.008G013600	T58579	0.0574818	0.0852669	0.674139	K12881	ko03013 RNA transport	ko03015 mRNA surveillance pathway	ko03040 Spliceosome
OG_23337	P.011G072700	T30204	0.028011	0.0416292	0.672869	K17815
OG_22857	P.007G076000	T37213	0.0112206	0.0167737	0.66894
OG_22679	P.009G158700	T58602	0.0301488	0.0450916	0.668612
OG_22645	P.001G211300	T59629	0.0155012	0.0233618	0.663527
OG_23478	P.003G040400	T59044	0.0147108	0.0222129	0.662266
OG_22763	P.005G158200	T07543	0.0237649	0.0359284	0.661453
OG_23323	P.005G112500	T17172	0.0190675	0.0292208	0.652531
OG_22607	P.006G191200	T56788	0.0347431	0.0536258	0.64788
OG_23364	P.011G040400	T49142	0.0258754	0.0405985	0.637349
OG_23432	P.007G149700	T20879	0.0171103	0.027005	0.633599
OG_22998	P.001G136500	T68918	0.0267119	0.0426632	0.62611
OG_22642	P.001G205900	T59315	0.0406706	0.0654045	0.621833
OG_23538	P.003G088000	T31090	0.0179238	0.0289267	0.61963
OG_23655	P.008G100000	T62265	0.0143533	0.0232054	0.618534
OG_23233	P.002G053600	T44253	0.0362888	0.0590968	0.614057
OG_22646	P.001G212300	T07562	0.0283875	0.0462685	0.613538
OG_23042	P.001G109000	T55455	0.0188308	0.0307838	0.61171
OG_23137	P.008G291600	T44695	0.0182693	0.0300546	0.607869
OG_22755	P.005G139400	T52241	0.0241263	0.040051	0.602389	K03539	ko03008 Ribosome biogenesis in eukaryotes	ko03013 RNA transport
OG_23056	P.001G113500	T67128	0.0241368	0.0400817	0.602192
OG_22612	P.006G186200	T34750	0.0191503	0.0319085	0.600163
OG_23416	P.002G252200	T13609	0.0213251	0.0358567	0.594733
OG_23096	P.001G041300	T41493	0.0173954	0.0294076	0.591529	K12592	ko03018 RNA degradation
OG_22950	P.008G070500	T13347	0.00900903	0.0152753	0.589778
OG_23330	P.011G052800	T31583	0.0102602	0.0179643	0.571145
OG_22734	P.002G000400	T63369	0.0374468	0.0660833	0.56666
OG_23015	P.008G241800	T58959	0.0172687	0.0305799	0.564708	K14649	ko03022 Basal transcription factors
OG_22727	P.002G010100	T33121	0.0241183	0.0431642	0.558756
OG_23473	P.001G028100	T59907	0.0345361	0.062779	0.550122
OG_23524	P.011G130500	T06596	0.0196718	0.0361946	0.5435	K02116
OG_22766	P.005G170200	T44798	0.0217543	0.0408684	0.532302
OG_22852	P.007G091500	T21661	0.0190141	0.0365429	0.520322	K02435	ko00970 Aminoacyl-tRNA biosynthesis
OG_23099	P.001G037700	T38264	0.0130167	0.02502	0.520252
OG_23391	P.008G233800	T28197	0.0117495	0.0226503	0.518735	K09422
OG_23179	P.007G252100	T38436	0.0108335	0.0209932	0.516051
OG_23231	P.002G047800	T36455	0.0181817	0.0352484	0.515815
OG_23620	P.008G118100	T26225	0.0220209	0.0428262	0.514192
OG_23498	P.011G177800	T53719	0.0173557	0.0337689	0.513956
OG_22677	P.009G258000	T59070	0.0257086	0.0501337	0.512801
OG_22798	P.003G156600	T57629	0.022028	0.0430147	0.512104	K10255	ko01040 Biosynthesis of unsaturated fatty acids	ko01212 Fatty acid metabolism	ko02020 Two-component system
OG_23490	P.008G016700	T46325	0.0203381	0.0400178	0.508226
OG_22914	P.002G284900	T02340	0.0230377	0.0453928	0.507519	K10990	ko03460 Fanconi anemia pathway
OG_23564	P.010G093000	T48172	0.0234313	0.0462882	0.506206
OG_22639	P.001G201800	T59001	0.0197906	0.0395859	0.499941
OG_23245	P.007G124100	T55835	0.0228551	0.0471976	0.484244
OG_23555	P.010G122300	T34679	0.0362979	0.075306	0.482006
OG_23145	P.003G266300	T57520	0.0160644	0.0335198	0.47925
OG_23139	P.008G292900	T39854	0.0159241	0.0333999	0.476772
OG_23495	P.010G053300	T56167	0.0225188	0.0475779	0.473304
OG_23577	P.011G192000	T43881	0.0201764	0.0426437	0.47314
OG_22963	P.002G100700	T12780	0.028126	0.0599085	0.469483
OG_22848	P.009G159400	T58102	0.0178977	0.0381915	0.468631
OG_23412	P.011G065500	T60586	0.00950919	0.0204153	0.465787
OG_23018	P.007G158100	T19751	0.039416	0.0854371	0.461346
OG_23007	P.009G178500	T63743	0.0445452	0.0966683	0.460804
OG_22822	P.007G200500	T06097	0.0197053	0.0431603	0.45656
OG_23514	P.010G085900	T51976	0.0182415	0.0399722	0.456354	K00142
OG_23047	P.001G101900	T25683	0.0194074	0.0426619	0.45491
OG_23346	P.002G162100	T47652	0.0144432	0.0318227	0.453864
OG_23562	P.007G271100	T45553	0.0242356	0.0541684	0.447412
OG_22856	P.007G081000	T35787	0.00764332	0.0171087	0.446751	K14432	ko04075 Plant hormone signal transduction
OG_23057	P.001G112000	T09277	0.030383	0.0680794	0.446288
OG_23519	P.004G136600	T21368	0.0097214	0.0218615	0.44468
OG_22997	P.001G135900	T27927	0.0137847	0.0311561	0.44244
OG_23196	P.001G053400	T40837	0.0218134	0.04984	0.437669
OG_23313	P.005G044100	T12570	0.0192867	0.0441317	0.437026
OG_23062	P.001G100200	T27498	0.0122115	0.0280091	0.435982
OG_23095	P.001G047200	T30285	0.01846	0.0429074	0.430229
OG_22821	P.007G200900	T07642	0.0179761	0.042071	0.42728
OG_23602	P.002G315700	T56049	0.0311398	0.0737073	0.422479
OG_23609	P.005G023200	T56583	0.0247859	0.0592591	0.418264
OG_22890	P.002G193700	T61362	0.0151477	0.0362843	0.417473
OG_23225	P.002G042200	T53792	0.0469993	0.113473	0.414189
OG_22778	P.003G113400	T04951	0.0198207	0.0480015	0.412918
OG_23388	P.003G253400	T17127	0.020287	0.0492127	0.412231
OG_23627	P.007G274000	T58322	0.0158072	0.0387774	0.407639
OG_23229	P.002G045500	T17370	0.0307829	0.0756824	0.406738	K02881	ko03010 Ribosome
OG_23150	P.010G134400	T13361	0.0221334	0.0545299	0.405895
OG_23182	P.006G111900	T34165	0.0138237	0.0341	0.405389	K17525
OG_23575	P.009G191500	T05264	0.00848934	0.0209757	0.404723
OG_22650	P.001G217100	T38411	0.0132342	0.032702	0.404691
OG_22973	P.003G168900	T39827	0.0152779	0.0384933	0.396896
OG_23378	P.003G275800	T17863	0.0232623	0.0588351	0.395381	K16222	ko04712 Circadian rhythm - plant
OG_22948	P.001G253000	T58259	0.0137423	0.0350568	0.392002	K14772
OG_22879	P.009G024700	T58450	0.0192366	0.0493424	0.38986
OG_22851	P.007G091900	T51531	0.0215813	0.0554299	0.389343
OG_23247	P.007G113200	T21289	0.00934681	0.0240527	0.388596
OG_23111	P.008G091600	T57559	0.0230073	0.0594657	0.3869
OG_23266	P.008G160300	T57260	0.0155928	0.0403235	0.386692
OG_23051	P.001G107200	T42838	0.0173123	0.0449376	0.385252
OG_23465	P.003G046500	T60138	0.0148578	0.0387245	0.38368
OG_23518	P.004G053400	T37613	0.0158682	0.0416265	0.381204
OG_23009	P.006G009000	T07166	0.0142134	0.0374283	0.37975
OG_23212	P.011G124800	T23074	0.0162627	0.0428686	0.379361
OG_22742	P.002G151400	T07443	0.025584	0.0683881	0.374101
OG_23235	P.002G054800	T22955	0.0178622	0.047838	0.37339
OG_23154	P.008G200200	T48022	0.0248334	0.0670345	0.370458
OG_22777	P.003G096700	T58746	0.0239267	0.064711	0.369748
OG_22840	P.009G139000	T21169	0.0167708	0.0455826	0.367922	K14801
OG_23033	P.006G131200	T36825	0.0159708	0.0436887	0.365559
OG_22883	P.009G009900	T57309	0.0171278	0.0470147	0.364308	K05309	ko00590 Arachidonic acid metabolism
OG_23509	P.009G226100	T35937	0.0186551	0.0514356	0.362688
OG_23130	P.008G284200	T40932	0.0230233	0.0635557	0.362254	K08101	ko00860 Porphyrin and chlorophyll metabolism
OG_22790	P.003G140100	T45335	0.012572	0.034731	0.361981
OG_23529	P.006G045700	T41765	0.0192002	0.0532486	0.360578
OG_22623	P.006G168100	T26517	0.0139358	0.0389047	0.358204
OG_22962	P.002G100000	T58707	0.0186298	0.0520899	0.357647
OG_23318	P.007G002100	T34294	0.0370614	0.104234	0.355561
OG_23004	P.009G175500	T32128	0.0128025	0.0361939	0.353719
OG_23068	P.007G104500	T57871	0.0216984	0.0614169	0.353297
OG_23284	P.005G075700	T51345	0.0135484	0.0384568	0.352302
OG_23405	P.011G138100	T36472	0.0174978	0.0496736	0.352256
OG_22668	P.006G097900	T59108	0.0170894	0.0485487	0.352006
OG_23335	P.011G079200	T15163	0.0102825	0.0293237	0.350654
OG_22858	P.001G077600	T67035	0.0316756	0.0905354	0.349869
OG_23048	P.001G101700	T15876	0.0299295	0.0856863	0.349292
OG_22676	P.009G257200	T14278	0.0230392	0.066143	0.348325
OG_23080	P.002G244600	T40298	0.0178325	0.0512554	0.347914	K13217
OG_23427	P.008G137700	T05055	0.0162306	0.046705	0.347513
OG_23206	P.011G021300	T10725	0.0328479	0.0949466	0.345962
OG_22896	P.002G213300	T58039	0.011103	0.0321992	0.344822
OG_23308	P.011G052300	T54121	0.013401	0.0392611	0.34133
OG_22598	P.006G211000	T71542	0.0271817	0.0799572	0.339953
OG_23305	P.011G216700	T51245	0.0198569	0.0585156	0.339343	K14404	ko03015 mRNA surveillance pathway
OG_22996	P.001G135800	T16924	0.0151649	0.044815	0.338389
OG_22673	P.006G110000	T30429	0.0220736	0.0656483	0.33624
OG_22634	P.001G190500	T58789	0.0195625	0.0583222	0.335421
OG_23580	P.006G049700	T17741	0.0291064	0.0877506	0.331694
OG_23484	P.002G333700	T06579	0.0230073	0.0694737	0.331166
OG_23175	P.002G126800	T46816	0.00857149	0.0259955	0.329729	K10899
OG_22616	P.006G180800	T57813	0.0147635	0.0448342	0.32929
OG_23384	P.010G072300	T57913	0.0164645	0.0503071	0.32728
OG_22899	P.007G014400	T57400	0.0158253	0.0484121	0.326888	K03639	ko00790 Folate biosynthesis	ko04122 Sulfur relay system
OG_23016	P.008G190100	T19415	0.0123609	0.0378315	0.326737	K16285
OG_23181	P.002G122400	T68073	0.0146589	0.0450854	0.325135	K18749
OG_22825	P.007G181800	T39995	0.0167059	0.0514724	0.32456
OG_22796	P.003G153500	T64905	0.0121671	0.0375364	0.324142	K10745	ko03030 DNA replication
OG_23325	P.011G003500	T21586	0.0157886	0.0489001	0.322874
OG_23074	P.002G172100	T63019	0.00750871	0.0232713	0.322659	K12462
OG_23113	P.008G084100	T61150	0.01885	0.0584966	0.32224
OG_22930	P.002G310900	T29351	0.0184185	0.0572175	0.321903	K15190
OG_23180	P.002G122800	T57125	0.00922569	0.0287642	0.320734
OG_23559	P.006G040800	T21485	0.0133128	0.0416316	0.319777	K10704
OG_23517	P.002G222200	T30478	0.00854075	0.0267336	0.319476
OG_22970	P.003G163400	T14370	0.0106236	0.0338451	0.313889
OG_22785	P.009G108000	T56087	0.0182045	0.0581671	0.312969
OG_23467	P.002G149700	T56733	0.0123436	0.0395037	0.312468
OG_22698	P.009G094400	T57832	0.0110997	0.0355903	0.311876
OG_22832	P.009G137000	T17743	0.0131499	0.0422252	0.311422
OG_22609	P.006G188700	T19497	0.0145237	0.0467657	0.310564
OG_22952	P.002G228300	T06571	0.0119621	0.0386137	0.30979
OG_22817	P.007G207300	T58417	0.0246981	0.0798307	0.309382	K03457
OG_22741	P.002G151200	T58683	0.162198	0.525698	0.308538
OG_22826	P.007G182600	T57947	0.0140721	0.0458204	0.307115	K17426
OG_22904	P.007G017200	T20381	0.0438355	0.142805	0.306961
OG_23127	P.008G275400	T00367	0.0298853	0.0974383	0.30671
OG_23404	P.003G031200	T58078	0.0227077	0.0741898	0.306075
OG_22728	P.002G008100	T35814	0.0150706	0.0492999	0.305693
OG_23223	P.010G039900	T07080	0.0153948	0.0504709	0.305023
OG_22740	P.002G059800	T28647	0.0078816	0.0258543	0.304847	K01669
OG_23170	P.004G024600	T59847	0.0303798	0.0999172	0.30405
OG_22988	P.005G116800	T55790	0.0237655	0.0785983	0.302366	K10528	ko00592 alpha-Linolenic acid metabolism
OG_23270	P.001G254200	T05619	0.0160864	0.0534453	0.300988
OG_23207	P.011G019300	T19749	0.0291177	0.0969138	0.300449
OG_23103	P.001G034900	T41889	0.014846	0.0494193	0.300408
OG_23616	P.005G033400	T58984	0.0174191	0.0584851	0.297838
OG_23422	P.008G269800	T10200	0.0416359	0.141812	0.293598
OG_22667	P.006G097600	T21389	0.0142505	0.0486023	0.293206
OG_23169	P.004G029600	T15375	0.0105606	0.0360431	0.293001
OG_23433	P.010G049700	T27513	0.0141432	0.048351	0.292512	K10640
OG_23269	P.009G125300	T24946	0.0128718	0.0442349	0.290987
OG_23453	P.004G176400	T28136	0.0145269	0.050231	0.289202	K11699
OG_23336	P.011G073100	T35139	0.0188217	0.0653456	0.288033
OG_22926	P.002G308600	T58529	0.0121893	0.0423422	0.287876	K15507
OG_22764	P.002G162200	T47651	0.0236528	0.0822482	0.287578
OG_22649	P.001G214800	T56079	0.0109135	0.0379889	0.287282
OG_22870	P.007G054200	T22619	0.0157922	0.0550479	0.28688
OG_22687	P.009G067500	T08475	0.0189382	0.0660641	0.286664
OG_23141	P.003G272100	T58510	0.0185797	0.0648213	0.28663	K15423
OG_23322	P.011G107400	T11983	0.169704	0.593527	0.285925
OG_23607	P.005G021800	T66888	0.027071	0.09493	0.285168
OG_23049	P.001G107600	T57412	0.0100124	0.0352761	0.283828	K09422
OG_23640	P.001G269000	T19848	0.0130364	0.0459961	0.283424
OG_22849	P.007G093000	T33579	0.0118719	0.0420996	0.281996
OG_23521	P.004G117500	T42830	0.0136002	0.048297	0.281595	K17278
OG_23295	P.008G218400	T31291	0.00561518	0.0199426	0.281567
OG_22894	P.002G209900	T67093	0.0183475	0.0652546	0.281169
OG_23275	P.003G222300	T42216	0.0153864	0.0552285	0.278595
OG_23368	P.007G280200	T57562	0.011376	0.0410001	0.277464
OG_23012	P.008G038800	T14636	0.010512	0.0379452	0.277031
OG_22842	P.009G150700	T56319	0.0100969	0.0365028	0.276605
OG_22843	P.009G151100	T07465	0.0134933	0.0489392	0.275716
OG_23468	P.006G036100	T31960	0.014113	0.0512876	0.275174	K15077
OG_23177	P.002G126400	T58310	0.0102082	0.0371676	0.274653
OG_23289	P.010G060500	T42659	0.0102194	0.0372481	0.274361
OG_23631	P.001G084900	T45484	0.0120687	0.0440414	0.27403
OG_22628	P.006G152000	T58735	0.00975299	0.0356605	0.273496	K04708	ko00600 Sphingolipid metabolism
OG_23445	P.002G080900	T05702	0.0145056	0.0532673	0.272317
OG_23350	P.002G035200	T06920	0.0209879	0.0771819	0.271928
OG_22804	P.003G082700	T56700	0.0147866	0.0546839	0.270401	K11147	ko00830 Retinol metabolism	ko04146 Peroxisome
OG_22917	P.002G287800	T05176	0.0150747	0.0559204	0.269575
OG_23112	P.010G093200	T50051	0.0153972	0.0573115	0.268657
OG_22652	P.001G217900	T16406	0.0199992	0.074522	0.268366
OG_23647	P.002G333300	T06466	0.0217012	0.080898	0.268254
OG_22692	P.009G082000	T56643	0.0120935	0.0451464	0.267874
OG_23513	P.009G202900	T45930	0.0187913	0.0701623	0.267827
OG_22663	P.006G093300	T41303	0.013118	0.049077	0.267295
OG_23195	P.005G026300	T20448	0.174092	0.652572	0.266778
OG_22940	P.008G051900	T10758	0.016601	0.0622298	0.266768
OG_23610	P.002G167800	T27080	0.0130239	0.0490254	0.265656
OG_23258	P.008G221600	T40366	0.00800903	0.0301751	0.265418
OG_23285	P.003G094700	T22206	0.148948	0.564201	0.263998
OG_23022	P.007G171700	T59300	0.00990309	0.03753	0.263872
OG_22980	P.005G085700	T54376	0.00895018	0.0341358	0.262194	K10865	ko03440 Homologous recombination	ko03450 Non-homologous end-joining
OG_22986	P.005G121800	T14530	0.0105264	0.0402192	0.261725
OG_23614	P.003G256500	T34732	0.0121729	0.0465833	0.261316
OG_23020	P.001G147600	T57771	0.00678069	0.0260905	0.259891	K03679	ko03018 RNA degradation
OG_23040	P.001G116900	T55958	0.0192134	0.0742933	0.258615
OG_23268	P.009G125700	T71387	0.1463	0.566986	0.25803
OG_23421	P.008G270000	T64611	0.0523006	0.202903	0.257762
OG_23399	P.003G219800	T56736	0.0119898	0.0467731	0.256339
OG_23395	P.010G122600	T31498	0.0150415	0.0592618	0.253815
OG_23070	P.007G103600	T64260	0.402254	1.58637	0.253568
OG_23481	P.001G010200	T39104	0.0371965	0.14716	0.252762
OG_23228	P.002G045400	T57664	0.0133784	0.0535584	0.24979	K02639	ko00195 Photosynthesis
OG_23625	P.009G206400	T15647	0.0106271	0.042571	0.249632
OG_23650	P.005G036700	T06403	0.013571	0.0546444	0.248351	K03216
OG_23185	P.009G210300	T43914	0.00481059	0.0195406	0.246185	K06928	ko00230 Purine metabolism	ko00730 Thiamine metabolism
OG_23595	P.005G075100	T13651	0.0167248	0.067976	0.24604
OG_23545	P.004G017900	T46539	0.0102959	0.0419304	0.245546
OG_22654	P.001G219400	T56606	0.00874636	0.0356325	0.245461	K03768
OG_22694	P.009G084300	T21566	0.0097988	0.0401923	0.243798	K15340
OG_23303	P.005G057600	T56526	0.0148246	0.0610198	0.242948
OG_23632	P.001G078600	T13806	0.0161545	0.0666902	0.242232
OG_23234	P.002G054200	T07635	0.0138014	0.0569899	0.242173
OG_23054	P.001G105300	T39201	0.0171098	0.0708529	0.241484
OG_23217	P.002G137300	T46223	0.00830496	0.0344248	0.241249
OG_22754	P.005G138500	T49087	0.0147685	0.0612179	0.241245
OG_22739	P.002G061500	T19519	0.0146719	0.0608665	0.241051
OG_23128	P.008G279400	T43096	0.00707378	0.0294173	0.240463	K03500
OG_23569	P.005G039600	T26519	0.0126511	0.053027	0.238579	K14662
OG_22913	P.007G046800	T26996	0.0191715	0.0804822	0.238207
OG_23333	P.003G055100	T05123	0.365402	1.53532	0.237997
OG_22729	P.002G007200	T56426	0.0103345	0.0438094	0.235897	K01438	ko00330 Arginine and proline metabolism	ko01210 2-Oxocarboxylic acid metabolism
OG_23334	P.003G055400	T57791	0.012849	0.0548525	0.234246
OG_22733	P.002G000500	T36898	0.0065291	0.0281221	0.23217
OG_23615	P.003G257200	T26763	0.0162631	0.070212	0.231629
OG_23526	P.002G059700	T61871	0.01996	0.0862549	0.231407
OG_22845	P.009G156600	T21163	0.0275982	0.119527	0.230894
OG_23649	P.002G315200	T58105	0.00798262	0.0347966	0.229408	K01056
OG_22810	P.007G216200	T59080	0.0222887	0.0973099	0.229048
OG_23221	P.010G025900	T61553	0.00568232	0.0249216	0.228008	K15032
OG_23274	P.003G221900	T14445	0.0116612	0.0511448	0.228003
OG_22714	P.002G031000	T25978	0.0122978	0.0539607	0.227903
OG_23483	P.005G002000	T42963	0.0098825	0.0434875	0.227249	K08734	ko03430 Mismatch repair	ko03460 Fanconi anemia pathway
OG_23050	P.001G107500	T42664	0.0145205	0.0641158	0.226473	K01738	ko00270 Cysteine and methionine metabolism	ko00920 Sulfur metabolism	ko01200 Carbon metabolism	ko01230 Biosynthesis of amino acids
OG_20347	P.005G035600	T58449	0.0099334	0.0444237	0.223606
OG_22713	P.002G031800	T58531	0.00901382	0.0403838	0.223204
OG_23023	P.007G170300	T57278	0.0145948	0.0654679	0.22293
OG_22772	P.005G176800	T56038	0.0107437	0.0486374	0.220893
OG_22991	P.001G121000	T43517	0.0126752	0.0575554	0.220225	K01640	ko00072 Synthesis and degradation of ketone bodies	ko00280 Valine, leucine and isoleucine degradation	ko00281 Geraniol degradation	ko00650 Butanoate metabolism	ko04146 Peroxisome
OG_23104	P.003G248000	T28630	0.00597744	0.0272352	0.219475
OG_23601	P.002G316100	T06698	0.0149115	0.0680054	0.219269
OG_22653	P.001G218600	T35398	0.0224472	0.103289	0.217324
OG_23386	P.011G028900	T19817	0.00797799	0.0367562	0.217052	K06950
OG_22735	P.002G056200	T57910	0.0073745	0.0339989	0.216904	K01074	ko00062 Fatty acid elongation	ko01212 Fatty acid metabolism	ko04142 Lysosome
OG_23394	P.010G072800	T60629	0.0126748	0.0589209	0.215116
OG_23406	P.011G061000	T18021	0.0103097	0.0479272	0.215112
OG_22855	P.007G081100	T27723	0.00639286	0.029735	0.214995
OG_22853	P.007G091200	T58871	0.0162764	0.0761956	0.213614	K12831	ko03040 Spliceosome
OG_23118	P.008G079000	T40950	0.218533	1.02328	0.213562
OG_22897	P.002G216600	T13833	0.00761235	0.0356814	0.213342	K17744	ko00053 Ascorbate and aldarate metabolism
OG_23197	P.001G054000	T55541	0.00532296	0.0249876	0.213024	K03661	ko00190 Oxidative phosphorylation	ko04142 Lysosome	ko04145 Phagosome
OG_23359	P.008G235000	T36929	0.0120886	0.0567702	0.21294
OG_23591	P.008G037200	T34716	0.00869742	0.0409255	0.212518
OG_22886	P.009G146400	T08295	0.0144799	0.0681436	0.21249
OG_22731	P.002G001000	T20129	0.0112943	0.0534335	0.211372
OG_22614	P.006G183800	T36866	0.0104893	0.049711	0.211005
OG_23656	P.009G176200	T58414	0.00989916	0.0469322	0.210925
OG_22947	P.008G060000	T46897	0.0178382	0.084727	0.210538
OG_22812	P.007G214900	T59686	0.00765759	0.0363743	0.210522
OG_23429	P.008G138200	T26404	0.0118331	0.0562885	0.210221
OG_23188	P.003G240600	T54357	0.0109525	0.0521784	0.209905	K14570	ko03008 Ribosome biogenesis in eukaryotes
OG_23126	P.008G275200	T35138	0.0127278	0.0606861	0.209732
OG_22847	P.009G154600	T57419	0.0101186	0.0483999	0.209063	K05906	ko00900 Terpenoid backbone biosynthesis
OG_23171	P.004G023900	T57415	0.0107071	0.0515301	0.207783
OG_22977	P.003G098300	T20061	0.00844734	0.0406758	0.207675
OG_23017	P.006G005300	T31499	0.00654059	0.0315777	0.207127	K12741
OG_23021	P.007G176700	T28729	0.0167322	0.0811166	0.206273	K14484	ko04075 Plant hormone signal transduction
OG_22600	P.006G201200	T55518	0.0160875	0.0781028	0.205979
OG_22911	P.007G035000	T30362	0.00796879	0.0388485	0.205125
OG_22834	P.009G137500	T30256	0.0127232	0.0623744	0.203981
OG_23211	P.011G018400	T41012	0.018908	0.0930346	0.203237
OG_23077	P.002G241400	T57583	0.0196184	0.0966295	0.203027	K00799	ko00480 Glutathione metabolism	ko00980 Metabolism of xenobiotics by cytochrome P450	ko00982 Drug metabolism - cytochrome P450
OG_23547	P.010G064400	T06531	0.0100987	0.049803	0.202773
OG_23184	P.002G119800	T13869	0.0203538	0.100573	0.202378
OG_22725	P.002G012100	T20888	0.00464253	0.0229578	0.20222
OG_23299	P.001G242400	T27725	0.0106318	0.0528204	0.201282
OG_23003	P.009G175100	T48355	0.0131266	0.0656333	0.199999
OG_23664	P.004G146400	T41555	0.00626057	0.0314554	0.19903
OG_23385	P.010G071600	T33636	0.00574213	0.0288997	0.198691	K07447
OG_23105	P.003G243700	T36289	0.00561941	0.0286327	0.196258
OG_22923	P.002G304600	T20687	0.0154822	0.0791207	0.195678	K13248	ko00750 Vitamin B6 metabolism
OG_22803	P.003G082500	T56474	0.0208166	0.107528	0.193592	K18045
OG_22622	P.006G168200	T19529	0.00423943	0.0219212	0.193394
OG_23353	P.002G036500	T17006	0.0120895	0.0630363	0.191787
OG_22602	P.006G200900	T47629	0.0300752	0.158516	0.18973
OG_23590	P.009G226400	T21363	0.00732033	0.0389336	0.188021	K08963	ko00270 Cysteine and methionine metabolism
OG_22902	P.007G015700	T59631	0.0138937	0.0739144	0.18797
OG_22757	P.005G149900	T39366	0.0278621	0.148401	0.187749
OG_22678	P.009G258200	T05356	0.00680939	0.036276	0.187711
OG_23201	P.011G030900	T20739	0.00788762	0.0420952	0.187376
OG_23249	P.001G166600	T56914	0.0086805	0.0464483	0.186885
OG_22964	P.002G101900	T40811	0.018511	0.0991453	0.186706
OG_23568	P.005G039800	T57785	0.0105021	0.056354	0.186359
OG_22871	P.002G317100	T58919	0.0298535	0.160339	0.186189
OG_22711	P.005G099900	T52189	0.00950634	0.0510709	0.18614	K18204
OG_23148	P.010G129200	T04943	0.00834648	0.0449367	0.185739
OG_23662	P.008G009400	T28637	0.00765386	0.0412134	0.185713
OG_23576	P.010G007300	T58027	0.0100851	0.0543484	0.185564	K01079	ko00260 Glycine, serine and threonine metabolism	ko00680 Methane metabolism	ko01200 Carbon metabolism	ko01230 Biosynthesis of amino acids
OG_23025	P.007G169400	T19977	0.00531631	0.0286677	0.185446
OG_23375	P.008G248400	T66217	0.0125871	0.0679006	0.185375
OG_23475	P.009G215500	T17862	0.0135601	0.0732878	0.185026
OG_23450	P.010G104900	T17344	0.0053051	0.0286858	0.184938	K00606	ko00770 Pantothenate and CoA biosynthesis
OG_23203	P.011G027500	T52721	0.00890229	0.0483898	0.18397	K18164
OG_22831	P.009G136500	T58801	0.0097893	0.0533548	0.183476
OG_23531	P.007G224100	T34094	0.0159236	0.0871742	0.182664	K02527	ko00540 Lipopolysaccharide biosynthesis
OG_22966	P.003G160100	T10109	0.0140466	0.0769979	0.182428
OG_22859	P.007G069600	T54908	0.0097346	0.0534659	0.182071
OG_23659	P.001G095800	T41638	0.0152576	0.084115	0.18139	K00231	ko00860 Porphyrin and chlorophyll metabolism
OG_22928	P.002G309900	T20423	0.00856104	0.0473852	0.180669
OG_22775	P.005G182400	T29994	0.0155992	0.0869579	0.179388	K09874
OG_22868	P.007G057700	T05222	0.00864967	0.0482798	0.179157
OG_23449	P.010G001400	T08895	0.0138137	0.0772033	0.178926
OG_23055	P.001G105100	T27991	0.0136197	0.0770298	0.176811	K00962	ko00230 Purine metabolism	ko00240 Pyrimidine metabolism	ko03018 RNA degradation
OG_23516	P.002G223100	T07710	0.0101889	0.0581003	0.175368
OG_22596	P.006G214500	T56879	0.0199462	0.114064	0.174869
OG_23437	P.003G197000	T33560	0.00881158	0.0504356	0.174709	K03501
OG_23444	P.002G068000	T55400	0.17688	1.01367	0.174496	K03671
OG_23106	P.003G239700	T55132	0.403004	2.32303	0.173482	K13692
OG_22869	P.007G054700	T07277	0.00584672	0.0338753	0.172595
OG_22718	P.002G029100	T56181	0.014195	0.0824649	0.172133
OG_23010	P.003G250300	T16949	0.00326357	0.0189925	0.171835
OG_23272	P.001G256500	T57273	0.0132009	0.0774561	0.170431	K14856
OG_22931	P.004G166400	T30262	0.00847398	0.0497831	0.170218	K14484	ko04075 Plant hormone signal transduction
OG_23238	P.001G174700	T48750	0.00859339	0.0505268	0.170076	K10737
OG_22861	P.008G292300	T51715	0.0145144	0.0855877	0.169585	K00872	ko00260 Glycine, serine and threonine metabolism	ko01230 Biosynthesis of amino acids
OG_23064	P.001G099300	T29962	0.00678925	0.0400883	0.169357	K08488	ko04130 SNARE interactions in vesicular transport	ko04145 Phagosome
OG_23369	P.004G171800	T20697	0.00870479	0.0516235	0.168621
OG_22661	P.006G091900	T19860	0.0194392	0.116025	0.167543
OG_23533	P.007G247600	T56296	0.010241	0.0612902	0.16709
OG_22782	P.003G126200	T15216	0.00835706	0.0504098	0.165783
OG_22760	P.005G153800	T36770	0.0120823	0.0733731	0.164669	K00311
OG_22956	P.003G292300	T58295	0.00329685	0.0201096	0.163945
OG_23293	P.001G228100	T07677	0.00683697	0.0418013	0.163559
OG_22941	P.008G052100	T56206	0.00866208	0.0532112	0.162787
OG_23511	P.008G013900	T23001	0.0117974	0.0725588	0.162591
OG_22829	P.009G135500	T29847	0.00649446	0.0400425	0.162189
OG_23117	P.008G079900	T19912	0.00536918	0.0331943	0.16175
OG_23304	P.005G058900	T58216	0.0109492	0.0678251	0.161434
OG_23438	P.009G242400	T14318	0.00491096	0.0305199	0.16091	K00968	ko00440 Phosphonate and phosphinate metabolism	ko00564 Glycerophospholipid metabolism
OG_23373	P.006G064800	T58723	0.0103232	0.0642683	0.160627
OG_23218	P.002G137400	T57941	0.0074155	0.046227	0.160415
OG_23132	P.008G286800	T26700	0.00388424	0.024255	0.160142
OG_22937	P.008G006900	T24672	0.0173323	0.108633	0.15955
OG_23140	P.003G278000	T59241	0.0108477	0.0684372	0.158506
OG_23069	P.007G104300	T18308	0.00910064	0.0574388	0.15844
OG_22889	P.002G188500	T07851	0.00872235	0.0552321	0.157922	K11714
OG_23222	P.010G031200	T58255	0.00969309	0.0616253	0.157291
OG_22987	P.005G118000	T32200	0.00606406	0.038678	0.156783
OG_23131	P.008G284300	T55562	0.496759	3.17728	0.156347
OG_23260	P.001G244600	T57159	0.0125484	0.0805356	0.155812
OG_22893	P.002G205400	T56062	0.00420645	0.0272987	0.154089	K12885
OG_23061	P.001G100500	T30357	0.00716693	0.0470298	0.152391
OG_22666	P.006G095900	T38318	0.00690575	0.0454757	0.151856
OG_23377	P.008G242500	T57831	0.0102402	0.0688254	0.148786
OG_22867	P.007G063300	T58210	0.0111623	0.0753047	0.148228	K13458	ko04626 Plant-pathogen interaction
OG_23599	P.005G030300	T40543	0.00930957	0.0631144	0.147503
OG_22813	P.007G213300	T57290	0.00725043	0.0494806	0.146531
OG_22791	P.003G140500	T56340	0.0132941	0.0910319	0.146037	K18368	ko00940 Phenylpropanoid biosynthesis
OG_23379	P.011G003100	T47764	0.0160772	0.110879	0.144997
OG_23026	P.007G133100	T58139	0.00404457	0.0280169	0.144362
OG_23471	P.001G027200	T37537	0.0068163	0.0475156	0.143454	K15040	ko04020 Calcium signaling pathway	ko04022 cGMP - PKG signaling pathway
OG_23114	P.008G083900	T55982	0.00431616	0.0301383	0.143212
OG_23410	P.008G175700	T59708	0.0110559	0.0774674	0.142717
OG_22722	P.002G019000	T51798	0.0169018	0.118747	0.142334
OG_22959	P.009G240300	T40149	0.00760469	0.053455	0.142263
OG_22657	P.006G088000	T60326	0.00396412	0.0280045	0.141553	K01051	ko00040 Pentose and glucuronate interconversions	ko00500 Starch and sucrose metabolism
OG_22662	P.006G092000	T61683	0.0101439	0.0720615	0.140768
OG_23076	P.002G235700	T57110	0.00925128	0.0662248	0.139695
OG_22771	P.005G175800	T15219	0.0115193	0.083269	0.138339
OG_23168	P.002G319400	T18385	0.00969071	0.0700874	0.138266
OG_23622	P.010G146500	T66636	0.00840739	0.0610184	0.137784
OG_22862	P.003G223700	T38704	0.0158638	0.115707	0.137103
OG_22671	P.006G099800	T56291	0.0145512	0.107174	0.135772
OG_22629	P.006G152700	T58235	0.0054351	0.0403285	0.134771	K01687	ko00290 Valine, leucine and isoleucine biosynthesis	ko00770 Pantothenate and CoA biosynthesis	ko01210 2-Oxocarboxylic acid metabolism	ko01230 Biosynthesis of amino acids
OG_22682	P.009G144600	T35341	0.546132	4.05754	0.134597
OG_22819	P.007G203500	T57303	0.00539867	0.0403323	0.133855	K12608	ko03018 RNA degradation
OG_23441	P.011G037800	T39757	0.00674472	0.0507082	0.13301	K11341
OG_23044	P.001G101300	T16975	0.00592776	0.0449494	0.131876
OG_23455	P.005G043300	T40955	0.00600201	0.0456945	0.131351	K05284	ko00563 Glycosylphosphatidylinositol(GPI)-anchor biosynthesis
OG_22595	P.006G218300	T55657	0.0122419	0.0935745	0.130825
OG_23452	P.008G214900	T16415	0.00687758	0.0526431	0.130646
OG_22960	P.002G097800	T57210	0.00737254	0.0564933	0.130503
OG_22802	P.003G079600	T17008	0.0120247	0.0923088	0.130267	K05359	ko00400 Phenylalanine, tyrosine and tryptophan biosynthesis
OG_22844	P.009G151200	T26182	0.00755558	0.0594208	0.127154
OG_23102	P.001G036100	T06326	0.01957	0.153998	0.127079
OG_23623	P.002G076900	T59290	0.00811137	0.0645085	0.125741	K14492	ko04075 Plant hormone signal transduction
OG_23552	P.008G018900	T57304	0.0162692	0.13052	0.12465
OG_22774	P.005G178300	T82390	0.0165999	0.133573	0.124276
OG_23032	P.006G133000	T31854	0.00852073	0.0695208	0.122564
OG_23174	P.002G127100	T56292	0.0114751	0.0937614	0.122386	K17893
OG_22929	P.002G310200	T06429	0.0122538	0.100156	0.122347	K09286
OG_22993	P.001G124300	T10147	0.00533708	0.0442114	0.120717	K00286	ko00330 Arginine and proline metabolism
OG_22631	P.001G180100	T56083	0.00636185	0.0527574	0.120587	K18065
OG_22799	P.004G002100	T56459	0.0111166	0.0924822	0.120203	K02864	ko03010 Ribosome
OG_23347	P.002G163700	T06324	0.010759	0.0903318	0.119105
OG_22644	P.001G207500	T14911	0.00605805	0.0511016	0.118549
OG_22938	P.008G049900	T57544	0.00317698	0.0269786	0.117759
OG_23158	P.002G330700	T08673	0.0134715	0.115043	0.1171
OG_23563	P.007G231900	T55870	0.00645971	0.055307	0.116797
OG_23173	P.002G127200	T35818	0.00568056	0.0486466	0.116772
OG_23176	P.002G126700	T20007	0.0145963	0.125504	0.116302
OG_22756	P.005G148800	T41871	0.012213	0.10593	0.115293
OG_23548	P.001G002100	T54988	0.0102323	0.0888993	0.1151
OG_23472	P.001G027300	T07125	0.00745738	0.0650846	0.11458
OG_23151	P.005G161200	T39979	0.0120702	0.106551	0.113281
OG_23663	P.006G205400	T55005	0.00549171	0.0485869	0.113029
OG_23503	P.006G013500	T11988	0.00827638	0.0740361	0.111788	K00857	ko00240 Pyrimidine metabolism	ko00983 Drug metabolism - other enzymes
OG_23215	P.002G132500	T28722	0.00472904	0.0423065	0.11178
OG_23060	P.001G109600	T55737	0.00472933	0.0426141	0.11098
OG_23277	P.003G229700	T57933	0.00606978	0.0548632	0.110635
OG_22994	P.001G125200	T15139	0.00695804	0.0635804	0.109437	K03013	ko00230 Purine metabolism	ko00240 Pyrimidine metabolism	ko03020 RNA polymerase	ko04623 Cytosolic DNA-sensing pathway
OG_22924	P.003G088700	T14681	0.00828991	0.077024	0.107628	K00850	ko00010 Glycolysis / Gluconeogenesis	ko00030 Pentose phosphate pathway	ko00051 Fructose and mannose metabolism	ko00052 Galactose metabolism	ko00680 Methane metabolism	ko01200 Carbon metabolism	ko01230 Biosynthesis of amino acids	ko04152 AMPK signaling pathway
OG_23500	P.004G080400	T28349	0.00652916	0.0608723	0.10726	K00965	ko00052 Galactose metabolism	ko00520 Amino sugar and nucleotide sugar metabolism
OG_23504	P.006G007400	T44148	0.00897897	0.0845368	0.106214	K10520
OG_22724	P.002G016700	T29478	0.00812353	0.0765928	0.106061
OG_22749	P.005G097800	T22924	0.00262697	0.024885	0.105565
OG_22737	P.002G062400	T56402	0.00598104	0.0572593	0.104455
OG_23192	P.001G017200	T15030	0.011223	0.109332	0.102651
OG_23210	P.011G018700	T56821	0.00793531	0.0781019	0.101602
OG_23502	P.002G050700	T56195	0.00681699	0.067381	0.101171
OG_22910	P.007G029500	T68780	0.0017618	0.0180951	0.0973631
OG_23354	P.003G022100	T36952	0.0143077	0.146967	0.0973532
OG_23317	P.007G002200	T57818	0.0173722	0.180369	0.096315
OG_23232	P.002G050900	T59644	0.0120685	0.125517	0.0961504
OG_20632	P.002G034700	T10649	0.00834704	0.0873595	0.0955481	K03678	ko03018 RNA degradation
OG_23573	P.007G005900	T58341	0.00849732	0.0892988	0.095156	K01254	ko00590 Arachidonic acid metabolism
OG_23259	P.008G222200	T56369	0.0722869	0.765912	0.09438
OG_23343	P.001G074800	T57768	0.00694359	0.074985	0.0925997
OG_23489	P.008G017000	T36075	0.00386087	0.0428869	0.0900243
OG_22850	P.007G092600	T58070	0.00400143	0.0444884	0.0899433
OG_23400	P.003G219500	T16872	0.00582746	0.0655291	0.0889295
OG_22789	P.003G139800	T71744	0.00381311	0.0429448	0.0887908
OG_22839	P.009G140600	T08946	0.00209632	0.0239648	0.0874751
OG_22695	P.009G089200	T07738	0.0115137	0.133906	0.0859837
OG_23073	P.007G094400	T57212	0.00932157	0.110045	0.0847066
OG_22965	P.003G180300	T09449	0.00907428	0.107212	0.084639
OG_23456	P.011G203200	T58167	0.00228173	0.0274273	0.083192	K09567	ko03040 Spliceosome
OG_22736	P.002G057100	T90735	0.00346711	0.0419197	0.0827083	K08740
OG_23439	P.009G242300	T34001	0.00292975	0.0354716	0.0825945
OG_22901	P.007G014900	T57087	0.00561412	0.0685198	0.0819342	K04797
OG_23226	P.002G042300	T50674	0.0138563	0.169576	0.0817111	K15175
OG_23446	P.002G080400	T11542	0.00793474	0.10225	0.0776014
OG_22794	P.003G146100	T58081	0.00288082	0.0372825	0.0772702
OG_22903	P.007G016400	T35558	0.00649674	0.0856808	0.0758249
OG_22875	P.009G002300	T57270	0.00231077	0.031282	0.0738693	K05544
OG_22617	P.006G179800	T09975	0.0142346	0.194121	0.0733283	K14517	ko04075 Plant hormone signal transduction
OG_23236	P.001G172900	T58487	0.00322061	0.0455385	0.0707229	K02069
OG_22610	P.006G187200	T36512	0.0033941	0.048429	0.0700841
OG_22874	P.009G002100	T43868	0.00584506	0.0835992	0.0699176	K02834
OG_23596	P.011G107900	T60457	0.00690935	0.0998693	0.069184
OG_23043	P.002G155200	T56968	0.00835838	0.121908	0.068563
OG_22710	P.002G112000	T20016	0.00676294	0.100861	0.0670521
OG_23298	P.001G242900	T35941	0.184509	2.76021	0.0668458
OG_22746	P.002G155500	T59616	0.247771	3.742	0.0662134
OG_23637	P.011G035900	T55609	0.00846529	0.138344	0.0611899
OG_22863	P.007G065700	T56739	0.00687053	0.112887	0.0608623
OG_23426	P.008G003500	T22478	0.0151999	0.250342	0.0607167
OG_23360	P.008G266100	T33887	0.00728746	0.120739	0.0603573
OG_23558	P.006G043900	T19191	0.00368155	0.0658702	0.0558909	K03113	ko03013 RNA transport
OG_23572	P.002G082400	T09326	0.00197341	0.036148	0.0545924
OG_22738	P.002G061600	T60219	0.00220919	0.0421591	0.0524013	K00759	ko00230 Purine metabolism
OG_23164	P.002G326000	T20005	0.00724237	0.138311	0.0523631
OG_23565	P.008G041300	T14118	0.13025	2.52965	0.0514896
OG_22684	P.009G062800	T07669	0.0018231	0.0356029	0.0512065
OG_23300	P.006G085100	T06199	0.0036428	0.0751173	0.0484948	K12864	ko03040 Spliceosome
OG_23063	P.001G099200	T09423	0.00670348	0.139683	0.0479905
OG_22633	P.001G190000	T06049	0.0025314	0.0539732	0.0469011
OG_23389	P.008G232800	T19325	0.00269267	0.0578121	0.0465763
OG_23363	P.011G042600	T26311	0.00853088	0.189193	0.0450908
OG_22946	P.008G059200	T56427	0.00325031	0.0733151	0.0443334	K02931	ko03010 Ribosome
OG_23273	P.003G220300	T55256	0.00409785	0.0962848	0.0425597	K12863	ko03040 Spliceosome
OG_23584	P.004G146200	T59430	0.00786305	0.18498	0.0425074
OG_23371	P.006G062200	T30893	0.0025607	0.063433	0.0403686	K08064	ko04612 Antigen processing and presentation
OG_22689	P.009G080200	T55172	0.00535593	0.142479	0.037591	K13993
OG_23035	P.006G126800	T23050	0.0020627	0.0610505	0.0337869
OG_22835	P.011G049300	T59353	0.00355494	0.111404	0.0319104
OG_22720	P.002G024200	T05755	0.00281695	0.0906977	0.0310587
OG_23167	P.002G320800	T70383	0.00232927	0.0956372	0.0243553	K13448	ko04626 Plant-pathogen interaction
OG_23065	P.008G019700	T56614	0.00221524	0.0952858	0.0232483	K00670
OG_23553	P.010G120800	T34332	0.0020187	0.0985354	0.020487	K01507	ko00190 Oxidative phosphorylation
OG_22881	P.009G020000	T56707	0.0022167	0.112061	0.0197812	K08242	ko00100 Steroid biosynthesis
OG_23557	P.008G033800	T38346	0.000883678	0.0514308	0.0171819
OG_22880	P.009G007300	T58347	0.00243405	0.149766	0.0162524

## Sheet: Table S5
Orthologous groups in red represent ω2 or ω > 1, LRT < 0.05 and BEB >95% with positive selection sites in both M1a vs M2a and M7 vs M8.
Orthologous_Groups	Ath_Ortholog_ID	GO Accession	GO Names
OG_10001	AT5G22050.2	GO:0016301; GO:0008150; GO:0000003; GO:0009790; GO:0007165; GO:0048856; GO:0005886; GO:0003674; GO:0007049; GO:0006464; GO:0006520; GO:0043167	kinase activity; biological_process; reproduction; embryo development; signal transduction; anatomical structure development; plasma membrane; molecular_function; cell cycle; cellular protein modification process; cellular amino acid metabolic process; ion binding
OG_10002	AT4G15440.1	GO:0044281; GO:0006629; GO:0009058; GO:0034641; GO:0008150; GO:0006950; GO:0009536; GO:0006520; GO:0009056; GO:0007165; GO:0006790; GO:0005739; GO:0051186; GO:0006810; GO:0016829; GO:0009579; GO:0043167; GO:0016491; GO:0003674	small molecule metabolic process; lipid metabolic process; biosynthetic process; cellular nitrogen compound metabolic process; biological_process; response to stress; plastid; cellular amino acid metabolic process; catabolic process; signal transduction; sulfur compound metabolic process; mitochondrion; cofactor metabolic process; transport; lyase activity; thylakoid; ion binding; oxidoreductase …
OG_10007	AT2G41250.1	GO:0000003; GO:0048856; GO:0003674; GO:0008150	reproduction; anatomical structure development; molecular_function; biological_process
OG_10009	AT2G41640.2	GO:0005576; GO:0008150; GO:0016757	extracellular region; biological_process; transferase activity, transferring glycosyl groups
OG_10010	AT4G10650.1	GO:0008150; GO:0009536; GO:0043167	biological_process; plastid; ion binding
OG_10011	AT3G12040.1	GO:0006950; GO:0006259; GO:0016798; GO:0003677; GO:0005634	response to stress; DNA metabolic process; hydrolase activity, acting on glycosyl bonds; DNA binding; nucleus
OG_10034	AT3G08000.1	GO:0005777; GO:0009536; GO:0009579; GO:0009058; GO:0019748; GO:0048646; GO:0008150; GO:0048856; GO:0000003; GO:0001071; GO:0015979; GO:0003677; GO:0006950; GO:0042254; GO:0034641; GO:0003674; GO:0002376; GO:0008219; GO:0016491; GO:0071554; GO:0043167; GO:0006520; GO:0006605; GO:0005975; GO:0009056; GO:0005886; GO:0006397; GO:0005794; GO:0005575; GO:0003735; GO:0005829; GO:0005730; GO:0006464; GO:…	peroxisome; plastid; thylakoid; biosynthetic process; secondary metabolic process; anatomical structure formation involved in morphogenesis; biological_process; anatomical structure development; reproduction; nucleic acid binding transcription factor activity; photosynthesis; DNA binding; response to stress; ribosome biogenesis; cellular nitrogen compound metabolic process; molecular_function; im…
OG_10037	AT1G31240.1	GO:0005634; GO:0003674	nucleus; molecular_function
OG_10043	AT5G43880.1	GO:0005634; GO:0005575	nucleus; cellular_component
OG_10044	AT5G02540.1	GO:0009058; GO:0008150; GO:0016491; GO:0009536; GO:0044281; GO:0005886; GO:0005975; GO:0034641; GO:0000902; GO:0000003; GO:0030154; GO:0040007	biosynthetic process; biological_process; oxidoreductase activity; plastid; small molecule metabolic process; plasma membrane; carbohydrate metabolic process; cellular nitrogen compound metabolic process; cell morphogenesis; reproduction; cell differentiation; growth
OG_10057	AT2G48120.1	GO:0008150; GO:0009536; GO:0048856; GO:0009058; GO:0006629; GO:0006397	biological_process; plastid; anatomical structure development; biosynthetic process; lipid metabolic process; mRNA processing
OG_10061	AT1G04530.1	GO:0006950; GO:0008150; GO:0005575; GO:0005634; GO:0034641; GO:0003674	response to stress; biological_process; cellular_component; nucleus; cellular nitrogen compound metabolic process; molecular_function
OG_10064	AT5G47680.1	GO:0034641; GO:0044281; GO:0006399; GO:0005634; GO:0008168	cellular nitrogen compound metabolic process; small molecule metabolic process; tRNA metabolic process; nucleus; methyltransferase activity
OG_10071	AT3G47000.1	GO:0016798; GO:0005618; GO:0005773; GO:0006950; GO:0006810; GO:0005575; GO:0005576; GO:0005829; GO:0071554; GO:0008150; GO:0005886; GO:0002376; GO:0005975; GO:0034641; GO:0044281	hydrolase activity, acting on glycosyl bonds; cell wall; vacuole; response to stress; transport; cellular_component; extracellular region; cytosol; cell wall organization or biogenesis; biological_process; plasma membrane; immune system process; carbohydrate metabolic process; cellular nitrogen compound metabolic process; small molecule metabolic process
OG_10073	AT1G30520.1	GO:0043167; GO:0005777; GO:0008150; GO:0009056; GO:0044281; GO:0009058; GO:0019748; GO:0051186; GO:0005739; GO:0006950; GO:0016874; GO:0009536	ion binding; peroxisome; biological_process; catabolic process; small molecule metabolic process; biosynthetic process; secondary metabolic process; cofactor metabolic process; mitochondrion; response to stress; ligase activity; plastid
OG_10077	AT5G44520.1	GO:0009058; GO:0044281; GO:0009579; GO:0008150; GO:0009536; GO:0006520; GO:0006950; GO:0034641; GO:0006790; GO:0005975; GO:0009056; GO:0051186; GO:0016853	biosynthetic process; small molecule metabolic process; thylakoid; biological_process; plastid; cellular amino acid metabolic process; response to stress; cellular nitrogen compound metabolic process; sulfur compound metabolic process; carbohydrate metabolic process; catabolic process; cofactor metabolic process; isomerase activity
OG_10082	AT1G65440.3	GO:0009790; GO:0051276; GO:0034641; GO:0009058; GO:0005575; GO:0008150; GO:0005634; GO:0005829; GO:0003674	embryo development; chromosome organization; cellular nitrogen compound metabolic process; biosynthetic process; cellular_component; biological_process; nucleus; cytosol; molecular_function
OG_10083	AT5G19750.1	GO:0009536; GO:0005777; GO:0005739; GO:0005575	plastid; peroxisome; mitochondrion; cellular_component
OG_10085	AT2G41120.1	GO:0009536	plastid
OG_10086	AT3G56820.1	GO:0005768; GO:0005794; GO:0005739	endosome; Golgi apparatus; mitochondrion
OG_10087	AT5G04200.1	GO:0005576; GO:0006950; GO:0008219; GO:0008150; GO:0005737; GO:0005634; GO:0008233	extracellular region; response to stress; cell death; biological_process; cytoplasm; nucleus; peptidase activity
OG_10089	AT3G03630.1	GO:0009058; GO:0051186; GO:0006950; GO:0009056; GO:0006810; GO:0044281; GO:0048856; GO:0034641; GO:0005777; GO:0005794; GO:0043167; GO:0009579; GO:0006790; GO:0019748; GO:0006520; GO:0008150; GO:0005773; GO:0009536; GO:0016829; GO:0005829; GO:0005975; GO:0006091; GO:0006629; GO:0015979; GO:0000003; GO:0007568; GO:0005886; GO:0005739; GO:0003674; GO:0071554; GO:0005576; GO:0002376; GO:0005634; GO:…	biosynthetic process; cofactor metabolic process; response to stress; catabolic process; transport; small molecule metabolic process; anatomical structure development; cellular nitrogen compound metabolic process; peroxisome; Golgi apparatus; ion binding; thylakoid; sulfur compound metabolic process; secondary metabolic process; cellular amino acid metabolic process; biological_process; vacuole; …
OG_10091	AT1G58030.1	GO:0006950; GO:0009056; GO:0022857; GO:0005777; GO:0009058; GO:0000003; GO:0048856; GO:0005773; GO:0034641; GO:0044281; GO:0009536; GO:0042592; GO:0006810; GO:0005575; GO:0005840; GO:0005829; GO:0006520; GO:0005975; GO:0006605; GO:0055085; GO:0005618; GO:0005886; GO:0008150; GO:0005739; GO:0003674; GO:0008219; GO:0043167; GO:0005576; GO:0016491; GO:0002376; GO:0005634; GO:0006629	response to stress; catabolic process; transmembrane transporter activity; peroxisome; biosynthetic process; reproduction; anatomical structure development; vacuole; cellular nitrogen compound metabolic process; small molecule metabolic process; plastid; homeostatic process; transport; cellular_component; ribosome; cytosol; cellular amino acid metabolic process; carbohydrate metabolic process; pr…
OG_10094	AT1G64770.1	GO:0034641; GO:0005975; GO:0009056; GO:0044281; GO:0051186; GO:0009058; GO:0043234; GO:0005622; GO:0006091; GO:0015979; GO:0009536; GO:0009579; GO:0003674	cellular nitrogen compound metabolic process; carbohydrate metabolic process; catabolic process; small molecule metabolic process; cofactor metabolic process; biosynthetic process; protein complex; intracellular; generation of precursor metabolites and energy; photosynthesis; plastid; thylakoid; molecular_function
OG_10095	AT2G23840.1	GO:0004518; GO:0006950; GO:0008150; GO:0005634; GO:0003674	nuclease activity; response to stress; biological_process; nucleus; molecular_function
OG_10102	AT4G02980.1	GO:0009058; GO:0006259; GO:0007049; GO:0051301; GO:0008150; GO:0003674; GO:0000902; GO:0040007; GO:0009536; GO:0005783	biosynthetic process; DNA metabolic process; cell cycle; cell division; biological_process; molecular_function; cell morphogenesis; growth; plastid; endoplasmic reticulum
OG_10109	AT3G10340.1	GO:0006950; GO:0009058; GO:0019748; GO:0071554; GO:0005975; GO:0016829; GO:0008150; GO:0009056; GO:0034641; GO:0005829; GO:0006520; GO:0048856; GO:0044281	response to stress; biosynthetic process; secondary metabolic process; cell wall organization or biogenesis; carbohydrate metabolic process; lyase activity; biological_process; catabolic process; cellular nitrogen compound metabolic process; cytosol; cellular amino acid metabolic process; anatomical structure development; small molecule metabolic process
OG_10111	AT2G39190.2	GO:0008150; GO:0034641; GO:0009536; GO:0003674; GO:0006950; GO:0005886; GO:0006810	biological_process; cellular nitrogen compound metabolic process; plastid; molecular_function; response to stress; plasma membrane; transport
OG_10112	AT2G19540.1	GO:0048856; GO:0006950; GO:0008150; GO:0006464; GO:0000003; GO:0005575; GO:0006605; GO:0007049; GO:0051276; GO:0005634; GO:0003674; GO:0034641; GO:0043234; GO:0005622; GO:0007165; GO:0030154; GO:0005737; GO:0006259; GO:0009058; GO:0006810	anatomical structure development; response to stress; biological_process; cellular protein modification process; reproduction; cellular_component; protein targeting; cell cycle; chromosome organization; nucleus; molecular_function; cellular nitrogen compound metabolic process; protein complex; intracellular; signal transduction; cell differentiation; cytoplasm; DNA metabolic process; biosynthetic…
OG_10122	AT4G34660.1	GO:0005829; GO:0003674; GO:0005975; GO:0009058; GO:0044281; GO:0008150; GO:0005623; GO:0006629; GO:0005634; GO:0005886	cytosol; molecular_function; carbohydrate metabolic process; biosynthetic process; small molecule metabolic process; biological_process; cell; lipid metabolic process; nucleus; plasma membrane
OG_10123	AT5G46420.1	GO:0034641; GO:0042254; GO:0005975; GO:0009058; GO:0009536; GO:0002376; GO:0006950; GO:0008150; GO:0005840; GO:0003674; GO:0016779	cellular nitrogen compound metabolic process; ribosome biogenesis; carbohydrate metabolic process; biosynthetic process; plastid; immune system process; response to stress; biological_process; ribosome; molecular_function; nucleotidyltransferase activity
OG_10124	AT2G43840.2	GO:0034641; GO:0044281; GO:0016757; GO:0008150; GO:0006790; GO:0009058; GO:0019748; GO:0009056; GO:0006950; GO:0005737; GO:0006520; GO:0043226; GO:0005622; GO:0048856; GO:0071554; GO:0003674; GO:0006810	cellular nitrogen compound metabolic process; small molecule metabolic process; transferase activity, transferring glycosyl groups; biological_process; sulfur compound metabolic process; biosynthetic process; secondary metabolic process; catabolic process; response to stress; cytoplasm; cellular amino acid metabolic process; organelle; intracellular; anatomical structure development; cell wall or…
OG_10132	AT4G24810.2	GO:0034641; GO:0008150; GO:0071554; GO:0005975; GO:0009536; GO:0043226; GO:0005622; GO:0009058; GO:0005886; GO:0006950; GO:0006464; GO:0043167; GO:0016301	cellular nitrogen compound metabolic process; biological_process; cell wall organization or biogenesis; carbohydrate metabolic process; plastid; organelle; intracellular; biosynthetic process; plasma membrane; response to stress; cellular protein modification process; ion binding; kinase activity
OG_10134	AT1G22730.1	GO:0005829; GO:0008150; GO:0006950; GO:0007165; GO:0005794; GO:0005634; GO:0003674	cytosol; biological_process; response to stress; signal transduction; Golgi apparatus; nucleus; molecular_function
OG_10138	AT2G19080.1	GO:0005739; GO:0006605; GO:0006913; GO:0009536; GO:0007005; GO:0051604; GO:0003674; GO:0005634	mitochondrion; protein targeting; nucleocytoplasmic transport; plastid; mitochondrion organization; protein maturation; molecular_function; nucleus
OG_10142	AT3G08600.1	GO:0005975; GO:0005886; GO:0040007; GO:0071554; GO:0005739	carbohydrate metabolic process; plasma membrane; growth; cell wall organization or biogenesis; mitochondrion
OG_10144	AT2G40610.1	GO:0005829; GO:0008150; GO:0071554; GO:0006950; GO:0040007; GO:0005575; GO:0005198; GO:0005618; GO:0048856; GO:0006810; GO:0000902; GO:0007010; GO:0005576; GO:0009536; GO:0048646	cytosol; biological_process; cell wall organization or biogenesis; response to stress; growth; cellular_component; structural molecule activity; cell wall; anatomical structure development; transport; cell morphogenesis; cytoskeleton organization; extracellular region; plastid; anatomical structure formation involved in morphogenesis
OG_10148	AT1G07080.1	GO:0005576; GO:0003674; GO:0005773	extracellular region; molecular_function; vacuole
OG_10161	AT2G26110.1	GO:0008150; GO:0009536	biological_process; plastid
OG_10162	AT5G11840.1
OG_10163	AT1G64520.1	GO:0000003; GO:0048856; GO:0006950; GO:0009536; GO:0009056; GO:0044281; GO:0006629; GO:0051604; GO:0019748; GO:0009790; GO:0006461; GO:0000902; GO:0040007; GO:0021700; GO:0030154; GO:0005829; GO:0009058; GO:0043234; GO:0005622; GO:0006259; GO:0007049; GO:0008150; GO:0008233; GO:0005634	reproduction; anatomical structure development; response to stress; plastid; catabolic process; small molecule metabolic process; lipid metabolic process; protein maturation; secondary metabolic process; embryo development; protein complex assembly; cell morphogenesis; growth; developmental maturation; cell differentiation; cytosol; biosynthetic process; protein complex; intracellular; DNA metabo…
OG_10179	AT2G38420.1	GO:0034641; GO:0043226; GO:0005622; GO:0005737	cellular nitrogen compound metabolic process; organelle; intracellular; cytoplasm
OG_10180	AT2G38500.1	GO:0005634	nucleus
OG_10181	AT3G51610.1	GO:0048856; GO:0005886; GO:0006950	anatomical structure development; plasma membrane; response to stress
OG_10183	AT1G32070.3	GO:0034641; GO:0005975; GO:0009056; GO:0044281; GO:0051186; GO:0016746; GO:0009536; GO:0005634; GO:0009058	cellular nitrogen compound metabolic process; carbohydrate metabolic process; catabolic process; small molecule metabolic process; cofactor metabolic process; transferase activity, transferring acyl groups; plastid; nucleus; biosynthetic process
OG_10186	AT1G09780.1	GO:0005829; GO:0008150; GO:0005575; GO:0006950; GO:0016853; GO:0071554; GO:0005975; GO:0048856; GO:0005739; GO:0009536; GO:0005886; GO:0009058; GO:0044281; GO:0006629; GO:0005576; GO:0009056; GO:0043167	cytosol; biological_process; cellular_component; response to stress; isomerase activity; cell wall organization or biogenesis; carbohydrate metabolic process; anatomical structure development; mitochondrion; plastid; plasma membrane; biosynthetic process; small molecule metabolic process; lipid metabolic process; extracellular region; catabolic process; ion binding
OG_10194	AT5G18950.1	GO:0042592; GO:0051276; GO:0006950; GO:0006259; GO:0008150; GO:0000003; GO:0007059; GO:0051301; GO:0007049; GO:0005739; GO:0034641	homeostatic process; chromosome organization; response to stress; DNA metabolic process; biological_process; reproduction; chromosome segregation; cell division; cell cycle; mitochondrion; cellular nitrogen compound metabolic process
OG_10200	AT5G27820.1	GO:0005840; GO:0034641; GO:0009058; GO:0003735; GO:0042254; GO:0009536; GO:0006412	ribosome; cellular nitrogen compound metabolic process; biosynthetic process; structural constituent of ribosome; ribosome biogenesis; plastid; translation
OG_10202	AT5G11340.1	GO:0008150; GO:0005737; GO:0016746; GO:0009058	biological_process; cytoplasm; transferase activity, transferring acyl groups; biosynthetic process
OG_10203	AT4G38370.1	GO:0005634; GO:0008150; GO:0005829; GO:0003674	nucleus; biological_process; cytosol; molecular_function
OG_10207	AT3G51420.1	GO:0034641; GO:0009058; GO:0044281; GO:0048856; GO:0006810; GO:0005783; GO:0008150; GO:0007165; GO:0030154; GO:0008283; GO:0006464; GO:0016829; GO:0005634; GO:0009536; GO:0006950; GO:0005576; GO:0006629	cellular nitrogen compound metabolic process; biosynthetic process; small molecule metabolic process; anatomical structure development; transport; endoplasmic reticulum; biological_process; signal transduction; cell differentiation; cell proliferation; cellular protein modification process; lyase activity; nucleus; plastid; response to stress; extracellular region; lipid metabolic process
OG_10210	AT5G66090.1	GO:0009536	plastid
OG_10211	AT4G35930.1	GO:0008150; GO:0006950; GO:0005634; GO:0003674	biological_process; response to stress; nucleus; molecular_function
OG_10212	AT1G75900.1	GO:0008150; GO:0003674; GO:0040007; GO:0071554; GO:0016746; GO:0000003; GO:0048856; GO:0006790; GO:0009058; GO:0019748; GO:0005576; GO:0009056; GO:0006629	biological_process; molecular_function; growth; cell wall organization or biogenesis; transferase activity, transferring acyl groups; reproduction; anatomical structure development; sulfur compound metabolic process; biosynthetic process; secondary metabolic process; extracellular region; catabolic process; lipid metabolic process
OG_10215	AT5G66230.1	GO:0008283; GO:0000003; GO:0048646; GO:0009536; GO:0005634	cell proliferation; reproduction; anatomical structure formation involved in morphogenesis; plastid; nucleus
OG_10218	AT1G54150.1	GO:0005739; GO:0009536; GO:0003674; GO:0043167; GO:0007005	mitochondrion; plastid; molecular_function; ion binding; mitochondrion organization
OG_10222	AT1G72790.1	GO:0005634; GO:0005829; GO:0005886	nucleus; cytosol; plasma membrane
OG_10228	AT1G79730.1	GO:0000003; GO:0048856; GO:0008150; GO:0006464; GO:0034641; GO:0009058; GO:0005634; GO:0051276	reproduction; anatomical structure development; biological_process; cellular protein modification process; cellular nitrogen compound metabolic process; biosynthetic process; nucleus; chromosome organization
OG_10230	AT1G08500.1	GO:0005575; GO:0043167; GO:0005886; GO:0003674	cellular_component; ion binding; plasma membrane; molecular_function
OG_10234	AT1G67940.1	GO:0021700; GO:0030154; GO:0048856; GO:0040007; GO:0042592; GO:0000003; GO:0009056; GO:0008150; GO:0005773; GO:0005575; GO:0006810; GO:0009536; GO:0007165; GO:0005886; GO:0022857; GO:0005739; GO:0016887; GO:0009058; GO:0006950; GO:0055085; GO:0043167	developmental maturation; cell differentiation; anatomical structure development; growth; homeostatic process; reproduction; catabolic process; biological_process; vacuole; cellular_component; transport; plastid; signal transduction; plasma membrane; transmembrane transporter activity; mitochondrion; ATPase activity; biosynthetic process; response to stress; transmembrane transport; ion binding
OG_10235	AT1G18190.1	GO:0008150; GO:0009536; GO:0005794	biological_process; plastid; Golgi apparatus
OG_10240	AT1G14810.1	GO:0034641; GO:0009058; GO:0044281; GO:0016491; GO:0009536; GO:0005739; GO:0006520; GO:0008150; GO:0003674; GO:0006790	cellular nitrogen compound metabolic process; biosynthetic process; small molecule metabolic process; oxidoreductase activity; plastid; mitochondrion; cellular amino acid metabolic process; biological_process; molecular_function; sulfur compound metabolic process
OG_10242	AT1G24620.1	GO:0005773; GO:0004871; GO:0008150; GO:0003674; GO:0006950; GO:0043167; GO:0000003; GO:0048856; GO:0021700; GO:0030154; GO:0040007; GO:0005777; GO:0061024; GO:0005975; GO:0006810; GO:0009056; GO:0007165; GO:0005575; GO:0000902; GO:0005886; GO:0002376; GO:0005634; GO:0005739; GO:0006259	vacuole; signal transducer activity; biological_process; molecular_function; response to stress; ion binding; reproduction; anatomical structure development; developmental maturation; cell differentiation; growth; peroxisome; membrane organization; carbohydrate metabolic process; transport; catabolic process; signal transduction; cellular_component; cell morphogenesis; plasma membrane; immune sys…
OG_10245	AT5G39360.1	GO:0008150; GO:0006950; GO:0005739; GO:0000003; GO:0048856; GO:0007165; GO:0005634; GO:0003674	biological_process; response to stress; mitochondrion; reproduction; anatomical structure development; signal transduction; nucleus; molecular_function
OG_10247	AT5G15400.1	GO:0071554; GO:0009058; GO:0005975; GO:0005829; GO:0006464; GO:0009056; GO:0043234; GO:0005622; GO:0003674	cell wall organization or biogenesis; biosynthetic process; carbohydrate metabolic process; cytosol; cellular protein modification process; catabolic process; protein complex; intracellular; molecular_function
OG_10250	AT5G15330.1	GO:0005634; GO:0006950; GO:0006810	nucleus; response to stress; transport
OG_10251	AT3G28860.1	GO:0021700; GO:0030154; GO:0048856; GO:0040007; GO:0000003; GO:0009790; GO:0048646; GO:0009058; GO:0005975; GO:0043473; GO:0005773; GO:0006950; GO:0034655; GO:0044281; GO:0005575; GO:0006810; GO:0008150; GO:0000902; GO:0007165; GO:0005886; GO:0022857; GO:0005739; GO:0007010; GO:0006461; GO:0016887; GO:0007155; GO:0003674; GO:0005634; GO:0009536; GO:0071554; GO:0055085; GO:0043167	developmental maturation; cell differentiation; anatomical structure development; growth; reproduction; embryo development; anatomical structure formation involved in morphogenesis; biosynthetic process; carbohydrate metabolic process; pigmentation; vacuole; response to stress; nucleobase-containing compound catabolic process; small molecule metabolic process; cellular_component; transport; biolo…
OG_10255	AT5G40020.1	GO:0071554; GO:0005975; GO:0008150; GO:0009058; GO:0005575; GO:0048856; GO:0005618; GO:0005773; GO:0002376; GO:0006950; GO:0005576; GO:0034641	cell wall organization or biogenesis; carbohydrate metabolic process; biological_process; biosynthetic process; cellular_component; anatomical structure development; cell wall; vacuole; immune system process; response to stress; extracellular region; cellular nitrogen compound metabolic process
OG_10261	AT5G45380.1	GO:0005575; GO:0003674; GO:0055085	cellular_component; molecular_function; transmembrane transport
OG_10262	AT4G19390.1	GO:0005886; GO:0009536	plasma membrane; plastid
OG_10263	AT5G45360.1	GO:0005737; GO:0003674	cytoplasm; molecular_function
OG_10265	AT1G31790.1	GO:0034641; GO:0009536; GO:0003674	cellular nitrogen compound metabolic process; plastid; molecular_function
OG_10275	AT1G19690.1	GO:0009536; GO:0003674	plastid; molecular_function
OG_10281	AT1G47510.1	GO:0048856; GO:0016791; GO:0008150; GO:0043226; GO:0005622; GO:0044281; GO:0006629; GO:0005975; GO:0005737; GO:0007165; GO:0030154; GO:0006950	anatomical structure development; phosphatase activity; biological_process; organelle; intracellular; small molecule metabolic process; lipid metabolic process; carbohydrate metabolic process; cytoplasm; signal transduction; cell differentiation; response to stress
OG_10297	AT2G43360.1	GO:0009058; GO:0044281; GO:0006629; GO:0043167; GO:0005739; GO:0048856; GO:0040007; GO:0006790; GO:0051186; GO:0034641; GO:0000003; GO:0007010; GO:0003674	biosynthetic process; small molecule metabolic process; lipid metabolic process; ion binding; mitochondrion; anatomical structure development; growth; sulfur compound metabolic process; cofactor metabolic process; cellular nitrogen compound metabolic process; reproduction; cytoskeleton organization; molecular_function
OG_10305	AT1G10330.1	GO:0034641; GO:0000003; GO:0051301; GO:0007049; GO:0005739; GO:0009536; GO:0003674	cellular nitrogen compound metabolic process; reproduction; cell division; cell cycle; mitochondrion; plastid; molecular_function
OG_10311	AT3G26090.1	GO:0008150; GO:0006950; GO:0004871; GO:0003674; GO:0034655; GO:0044281; GO:0008283; GO:0007165; GO:0005768; GO:0030234; GO:0005634; GO:0005886	biological_process; response to stress; signal transducer activity; molecular_function; nucleobase-containing compound catabolic process; small molecule metabolic process; cell proliferation; signal transduction; endosome; enzyme regulator activity; nucleus; plasma membrane
OG_10312	AT1G67690.1	GO:0009536; GO:0008233; GO:0008150	plastid; peptidase activity; biological_process
OG_10313	AT1G27300.1	GO:0005794; GO:0005768; GO:0005634; GO:0003674	Golgi apparatus; endosome; nucleus; molecular_function
OG_10315	AT4G13870.2	GO:0003674; GO:0004518; GO:0005634; GO:0034641	molecular_function; nuclease activity; nucleus; cellular nitrogen compound metabolic process
OG_10316	AT5G39980.1	GO:0034641; GO:0008150; GO:0005739; GO:0003674	cellular nitrogen compound metabolic process; biological_process; mitochondrion; molecular_function
OG_10318	AT5G45580.1	GO:0034641; GO:0006950; GO:0008150; GO:0042592; GO:0009058; GO:0000003; GO:0048856; GO:0016829; GO:0006790; GO:0006520; GO:0006810; GO:0001071; GO:0009056; GO:0006259; GO:0005634; GO:0005739; GO:0043234; GO:0005622; GO:0003674; GO:0003677	cellular nitrogen compound metabolic process; response to stress; biological_process; homeostatic process; biosynthetic process; reproduction; anatomical structure development; lyase activity; sulfur compound metabolic process; cellular amino acid metabolic process; transport; nucleic acid binding transcription factor activity; catabolic process; DNA metabolic process; nucleus; mitochondrion; pro…
OG_10319	AT2G35540.1	GO:0005623; GO:0008150	cell; biological_process
OG_10320	AT5G46910.1	GO:0006464; GO:0051276; GO:0003674; GO:0034641; GO:0009058; GO:0000902; GO:0040007; GO:0000003; GO:0048856; GO:0005975; GO:0008150; GO:0005634	cellular protein modification process; chromosome organization; molecular_function; cellular nitrogen compound metabolic process; biosynthetic process; cell morphogenesis; growth; reproduction; anatomical structure development; carbohydrate metabolic process; biological_process; nucleus
OG_10321	AT5G46860.1	GO:0008150; GO:0007034; GO:0040007; GO:0071554; GO:0006605; GO:0005575; GO:0000902; GO:0000003; GO:0048856; GO:0007049; GO:0016192; GO:0005773; GO:0003674; GO:0061024; GO:0005768; GO:0005794; GO:0016023; GO:0005634	biological_process; vacuolar transport; growth; cell wall organization or biogenesis; protein targeting; cellular_component; cell morphogenesis; reproduction; anatomical structure development; cell cycle; vesicle-mediated transport; vacuole; molecular_function; membrane organization; endosome; Golgi apparatus; cytoplasmic membrane-bounded vesicle; nucleus
OG_10325	AT5G65540.1	GO:0005634	nucleus
OG_10330	AT1G79220.1	GO:0048856; GO:0008150; GO:0005739; GO:0003677; GO:0034641; GO:0009058	anatomical structure development; biological_process; mitochondrion; DNA binding; cellular nitrogen compound metabolic process; biosynthetic process
OG_10331	AT5G48460.1	GO:0005829; GO:0005618; GO:0008150; GO:0008092; GO:0007010; GO:0000902; GO:0000003; GO:0030154; GO:0040007; GO:0005773	cytosol; cell wall; biological_process; cytoskeletal protein binding; cytoskeleton organization; cell morphogenesis; reproduction; cell differentiation; growth; vacuole
OG_10339	AT5G16880.3	GO:0016192; GO:0008565; GO:0006605; GO:0007034; GO:0005829; GO:0061024; GO:0005794; GO:0008150; GO:0006950; GO:0005886; GO:0005634	vesicle-mediated transport; protein transporter activity; protein targeting; vacuolar transport; cytosol; membrane organization; Golgi apparatus; biological_process; response to stress; plasma membrane; nucleus
OG_10341	AT4G14890.1	GO:0034641; GO:0005975; GO:0009056; GO:0044281; GO:0051186; GO:0008150; GO:0003674; GO:0006091; GO:0015979; GO:0009058; GO:0006629; GO:0009536; GO:0042254	cellular nitrogen compound metabolic process; carbohydrate metabolic process; catabolic process; small molecule metabolic process; cofactor metabolic process; biological_process; molecular_function; generation of precursor metabolites and energy; photosynthesis; biosynthetic process; lipid metabolic process; plastid; ribosome biogenesis
OG_10342	AT3G22450.1	GO:0005739; GO:0005840; GO:0006412; GO:0003735	mitochondrion; ribosome; translation; structural constituent of ribosome
OG_10343	AT1G50030.1	GO:0051301; GO:0007049; GO:0006950; GO:0006259; GO:0009056; GO:0019748; GO:0030154; GO:0021700; GO:0048856; GO:0008150; GO:0009790; GO:0000003; GO:0042592; GO:0009058; GO:0051276; GO:0005575; GO:0007059; GO:0000902; GO:0005886; GO:0034641; GO:0003674; GO:0040007; GO:0007010; GO:0006461; GO:0003677; GO:0007155; GO:0016301; GO:0042254; GO:0005737; GO:0005634; GO:0071554	cell division; cell cycle; response to stress; DNA metabolic process; catabolic process; secondary metabolic process; cell differentiation; developmental maturation; anatomical structure development; biological_process; embryo development; reproduction; homeostatic process; biosynthetic process; chromosome organization; cellular_component; chromosome segregation; cell morphogenesis; plasma membra…
OG_10344	AT2G14660.1	GO:0005634	nucleus
OG_10350	AT5G02830.1	GO:0008150; GO:0009058; GO:0034641; GO:0005739; GO:0005975; GO:0048856; GO:0003674	biological_process; biosynthetic process; cellular nitrogen compound metabolic process; mitochondrion; carbohydrate metabolic process; anatomical structure development; molecular_function
OG_10358	AT5G06430.1	GO:0009536; GO:0009579; GO:0006091; GO:0006461; GO:0015979; GO:0042592; GO:0044281; GO:0016491	plastid; thylakoid; generation of precursor metabolites and energy; protein complex assembly; photosynthesis; homeostatic process; small molecule metabolic process; oxidoreductase activity
OG_10359	AT3G23400.1	GO:0009536; GO:0006950; GO:0009579; GO:0005886; GO:0008150; GO:0005634; GO:0005198	plastid; response to stress; thylakoid; plasma membrane; biological_process; nucleus; structural molecule activity
OG_10375	AT5G05520.1	GO:0009536; GO:0006950; GO:0000003; GO:0009790; GO:0051604; GO:0008150; GO:0006810; GO:0007165; GO:0048856; GO:0006464; GO:0009058; GO:0005975; GO:0016192; GO:0005634; GO:0005739	plastid; response to stress; reproduction; embryo development; protein maturation; biological_process; transport; signal transduction; anatomical structure development; cellular protein modification process; biosynthetic process; carbohydrate metabolic process; vesicle-mediated transport; nucleus; mitochondrion
OG_10376	AT3G11090.1	GO:0005654; GO:0003674; GO:0007165; GO:0005575; GO:0007155; GO:0071554; GO:0008150; GO:0007010; GO:0006461; GO:0048646; GO:0034641; GO:0009058; GO:0006950; GO:0048856; GO:0040007; GO:0000902; GO:0030154; GO:0003677; GO:0021700; GO:0000003; GO:0005739	nucleoplasm; molecular_function; signal transduction; cellular_component; cell adhesion; cell wall organization or biogenesis; biological_process; cytoskeleton organization; protein complex assembly; anatomical structure formation involved in morphogenesis; cellular nitrogen compound metabolic process; biosynthetic process; response to stress; anatomical structure development; growth; cell morpho…
OG_10377	AT3G11110.1	GO:0043167; GO:0009058; GO:0044281; GO:0006629; GO:0071554; GO:0005975; GO:0000003; GO:0009790; GO:0008150; GO:0003674; GO:0006464; GO:0006810; GO:0007165; GO:0048856; GO:0002376; GO:0006950; GO:0005634	ion binding; biosynthetic process; small molecule metabolic process; lipid metabolic process; cell wall organization or biogenesis; carbohydrate metabolic process; reproduction; embryo development; biological_process; molecular_function; cellular protein modification process; transport; signal transduction; anatomical structure development; immune system process; response to stress; nucleus
OG_10378	AT3G11150.1	GO:0009536	plastid
OG_10381	AT3G47080.1	GO:0008150; GO:0005634; GO:0003674	biological_process; nucleus; molecular_function
OG_10385	AT1G21770.1	GO:0005777; GO:0016746; GO:0009058; GO:0006629; GO:0005829; GO:0005654; GO:0043234	peroxisome; transferase activity, transferring acyl groups; biosynthetic process; lipid metabolic process; cytosol; nucleoplasm; protein complex
OG_10386	AT1G21760.1	GO:0006950; GO:0005623; GO:0006412; GO:0005634; GO:0005739; GO:0003674	response to stress; cell; translation; nucleus; mitochondrion; molecular_function
OG_10387	AT1G21790.1	GO:0005739; GO:0005575	mitochondrion; cellular_component
OG_10394	AT3G13200.1	GO:0005634; GO:0006397	nucleus; mRNA processing
OG_10395	AT4G17370.1	GO:0005576; GO:0016491; GO:0008150	extracellular region; oxidoreductase activity; biological_process
OG_10399	AT5G46580.1	GO:0008150; GO:0000003; GO:0009790; GO:0006605; GO:0034641; GO:0009058; GO:0022607; GO:0005975; GO:0006520; GO:0009536; GO:0048856; GO:0003674	biological_process; reproduction; embryo development; protein targeting; cellular nitrogen compound metabolic process; biosynthetic process; cellular component assembly; carbohydrate metabolic process; cellular amino acid metabolic process; plastid; anatomical structure development; molecular_function
OG_10400	AT1G32520.1	GO:0009536	plastid
OG_10402	AT1G16900.1	GO:0009056; GO:0009058; GO:0005975; GO:0006629; GO:0003674; GO:0005783; GO:0016757; GO:0043234; GO:0005794	catabolic process; biosynthetic process; carbohydrate metabolic process; lipid metabolic process; molecular_function; endoplasmic reticulum; transferase activity, transferring glycosyl groups; protein complex; Golgi apparatus
OG_10405	AT1G16920.1	GO:0005773; GO:0016023; GO:0006457; GO:0006950; GO:0071554; GO:0016192; GO:0005794; GO:0000003; GO:0048856; GO:0043167; GO:0005623; GO:0006810; GO:0005829; GO:0008150; GO:0000902; GO:0030154; GO:0040007; GO:0005575; GO:0005737; GO:0007165; GO:0003924; GO:0005886; GO:0005768; GO:0005634; GO:0019899; GO:0051301; GO:0007049; GO:0002376; GO:0034655; GO:0044281; GO:0006913	vacuole; cytoplasmic membrane-bounded vesicle; protein folding; response to stress; cell wall organization or biogenesis; vesicle-mediated transport; Golgi apparatus; reproduction; anatomical structure development; ion binding; cell; transport; cytosol; biological_process; cell morphogenesis; cell differentiation; growth; cellular_component; cytoplasm; signal transduction; GTPase activity; plasma…
OG_10409	AT4G29010.1	GO:0000003; GO:0048856; GO:0006950; GO:0009056; GO:0044281; GO:0006629; GO:0016491; GO:0016829; GO:0019748; GO:0006461; GO:0009536; GO:0005618; GO:0005777; GO:0005730; GO:0005829; GO:0008150; GO:0009058; GO:0005575; GO:0006520; GO:0034641; GO:0003674	reproduction; anatomical structure development; response to stress; catabolic process; small molecule metabolic process; lipid metabolic process; oxidoreductase activity; lyase activity; secondary metabolic process; protein complex assembly; plastid; cell wall; peroxisome; nucleolus; cytosol; biological_process; biosynthetic process; cellular_component; cellular amino acid metabolic process; cell…
OG_10413	AT1G49050.1	GO:0009058; GO:0006464; GO:0008150; GO:0005575; GO:0005618; GO:0000003; GO:0005794; GO:0005576; GO:0048856; GO:0006810; GO:0009056; GO:0008233	biosynthetic process; cellular protein modification process; biological_process; cellular_component; cell wall; reproduction; Golgi apparatus; extracellular region; anatomical structure development; transport; catabolic process; peptidase activity
OG_10428	AT3G51270.1	GO:0005634; GO:0016301; GO:0043167; GO:0006464	nucleus; kinase activity; ion binding; cellular protein modification process
OG_10440	AT1G79870.1	GO:0008150; GO:0016491; GO:0005829; GO:0009058; GO:0048856; GO:0015979; GO:0003674; GO:0044281; GO:0006950; GO:0030154; GO:0009536; GO:0006520	biological_process; oxidoreductase activity; cytosol; biosynthetic process; anatomical structure development; photosynthesis; molecular_function; small molecule metabolic process; response to stress; cell differentiation; plastid; cellular amino acid metabolic process
OG_10442	AT2G38440.1	GO:0007049; GO:0040007; GO:0000003; GO:0051301; GO:0006259; GO:0007010; GO:0006461; GO:0051276; GO:0043234; GO:0005737; GO:0007155; GO:0048646; GO:0008150; GO:0048856; GO:0030154; GO:0021700; GO:0008092; GO:0009536; GO:0005886; GO:0071554; GO:0000902; GO:0005856	cell cycle; growth; reproduction; cell division; DNA metabolic process; cytoskeleton organization; protein complex assembly; chromosome organization; protein complex; cytoplasm; cell adhesion; anatomical structure formation involved in morphogenesis; biological_process; anatomical structure development; cell differentiation; developmental maturation; cytoskeletal protein binding; plastid; plasma …
OG_10444	AT1G04390.1	GO:0008150; GO:0000003; GO:0048856; GO:0009536; GO:0003674	biological_process; reproduction; anatomical structure development; plastid; molecular_function
OG_10448	AT2G26260.1	GO:0008150; GO:0009058; GO:0044281; GO:0006629; GO:0005575; GO:0043226; GO:0005622; GO:0016491; GO:0005886; GO:0006790; GO:0051186; GO:0006950; GO:0005737; GO:0048856	biological_process; biosynthetic process; small molecule metabolic process; lipid metabolic process; cellular_component; organelle; intracellular; oxidoreductase activity; plasma membrane; sulfur compound metabolic process; cofactor metabolic process; response to stress; cytoplasm; anatomical structure development
OG_10449	AT1G06110.1	GO:0009056; GO:0044281; GO:0003674; GO:0005634; GO:0043234; GO:0005622	catabolic process; small molecule metabolic process; molecular_function; nucleus; protein complex; intracellular
OG_10459	AT3G09210.1	GO:0009058; GO:0006629; GO:0008150; GO:0009536; GO:0000229; GO:0044281; GO:0061024; GO:0034641	biosynthetic process; lipid metabolic process; biological_process; plastid; cytoplasmic chromosome; small molecule metabolic process; membrane organization; cellular nitrogen compound metabolic process
OG_10462	AT3G12685.1	GO:0005886	plasma membrane
OG_10467	AT2G43110.1	GO:0005634	nucleus
OG_10477	AT2G32280.1
OG_10479	AT3G21870.1	GO:0016301; GO:0048856; GO:0005634; GO:0006520; GO:0019899; GO:0006464; GO:0007049	kinase activity; anatomical structure development; nucleus; cellular amino acid metabolic process; enzyme binding; cellular protein modification process; cell cycle
OG_10484	AT5G58920.1
OG_10487	AT2G18410.1	GO:0006605; GO:0007005; GO:0005634; GO:0034641; GO:0009058	protein targeting; mitochondrion organization; nucleus; cellular nitrogen compound metabolic process; biosynthetic process
OG_10495	AT5G60590.2	GO:0003723	RNA binding
OG_10497	AT1G07970.1	GO:0005634	nucleus
OG_10498	AT2G27800.1	GO:0005739; GO:0008150; GO:0000003; GO:0048856; GO:0009536	mitochondrion; biological_process; reproduction; anatomical structure development; plastid
OG_10499	AT2G28510.1	GO:0006457; GO:0006950; GO:0071554; GO:0009058; GO:0008150; GO:0019748; GO:0005730; GO:0003677; GO:0034641; GO:0009056; GO:0006520; GO:0006790; GO:0001071; GO:0005975; GO:0030154; GO:0048856; GO:0000003; GO:0009790; GO:0043234; GO:0005622	protein folding; response to stress; cell wall organization or biogenesis; biosynthetic process; biological_process; secondary metabolic process; nucleolus; DNA binding; cellular nitrogen compound metabolic process; catabolic process; cellular amino acid metabolic process; sulfur compound metabolic process; nucleic acid binding transcription factor activity; carbohydrate metabolic process; cell d…
OG_10503	AT5G14180.1	GO:0009056; GO:0044281; GO:0006629; GO:0008150; GO:0003674; GO:0005739; GO:0016874; GO:0005623; GO:0005576; GO:0000003; GO:0040011; GO:0048856; GO:0006520; GO:0006950; GO:0003924; GO:0005886; GO:0005634; GO:0009058; GO:0006790; GO:0051186	catabolic process; small molecule metabolic process; lipid metabolic process; biological_process; molecular_function; mitochondrion; ligase activity; cell; extracellular region; reproduction; locomotion; anatomical structure development; cellular amino acid metabolic process; response to stress; GTPase activity; plasma membrane; nucleus; biosynthetic process; sulfur compound metabolic process; co…
OG_10505	AT5G14210.1	GO:0008150; GO:0016301; GO:0048856; GO:0000003; GO:0009058; GO:0005886; GO:0005975; GO:0000902; GO:0040007; GO:0030154; GO:0007165; GO:0006950; GO:0006464; GO:0009536; GO:0043167; GO:0003674	biological_process; kinase activity; anatomical structure development; reproduction; biosynthetic process; plasma membrane; carbohydrate metabolic process; cell morphogenesis; growth; cell differentiation; signal transduction; response to stress; cellular protein modification process; plastid; ion binding; molecular_function
OG_10518	AT2G40600.1	GO:0005829	cytosol
OG_10519	AT1G58350.3
OG_10524	AT1G64080.1	GO:0005634; GO:0005886	nucleus; plasma membrane
OG_10525	AT1G64380.1	GO:0006950; GO:0008150; GO:0030154; GO:0008219; GO:0003677; GO:0003674; GO:0006810; GO:0001071; GO:0034641; GO:0009058; GO:0005737; GO:0007165; GO:0005634; GO:0005886; GO:0043234; GO:0005622	response to stress; biological_process; cell differentiation; cell death; DNA binding; molecular_function; transport; nucleic acid binding transcription factor activity; cellular nitrogen compound metabolic process; biosynthetic process; cytoplasm; signal transduction; nucleus; plasma membrane; protein complex; intracellular
OG_10529	AT1G71500.1	GO:0009536; GO:0009579; GO:0008150; GO:0003674; GO:0016491	plastid; thylakoid; biological_process; molecular_function; oxidoreductase activity
OG_10530	AT4G25340.1	GO:0008150; GO:0043167; GO:0008289; GO:0006950; GO:0009058; GO:0044281; GO:0006629; GO:0005783; GO:0009536; GO:0005829; GO:0003674; GO:0034641; GO:0016491; GO:0009579; GO:0005794; GO:0042393; GO:0005773; GO:0051276; GO:0006464; GO:0005623; GO:0016853; GO:0006259; GO:0006461; GO:0005730; GO:0006091; GO:0015979; GO:0006457	biological_process; ion binding; lipid binding; response to stress; biosynthetic process; small molecule metabolic process; lipid metabolic process; endoplasmic reticulum; plastid; cytosol; molecular_function; cellular nitrogen compound metabolic process; oxidoreductase activity; thylakoid; Golgi apparatus; histone binding; vacuole; chromosome organization; cellular protein modification process; …
OG_10532	AT2G01590.1	GO:0006091; GO:0015979; GO:0009536; GO:0043234; GO:0005622	generation of precursor metabolites and energy; photosynthesis; plastid; protein complex; intracellular
OG_10537	AT1G06530.1	GO:0007005; GO:0005777; GO:0005773; GO:0005739; GO:0008150; GO:0005829; GO:0009536	mitochondrion organization; peroxisome; vacuole; mitochondrion; biological_process; cytosol; plastid
OG_10538	AT5G16550.1	GO:0005634; GO:0005783	nucleus; endoplasmic reticulum
OG_10539	AT4G02485.1	GO:0005634; GO:0008150; GO:0016491	nucleus; biological_process; oxidoreductase activity
OG_10546	AT3G47610.1	GO:0008283; GO:0000003; GO:0048856; GO:0005634; GO:0043167; GO:0034641; GO:0009058	cell proliferation; reproduction; anatomical structure development; nucleus; ion binding; cellular nitrogen compound metabolic process; biosynthetic process
OG_10550	AT3G22990.1	GO:0006259; GO:0000003; GO:0030154; GO:0048856; GO:0005634; GO:0003674	DNA metabolic process; reproduction; cell differentiation; anatomical structure development; nucleus; molecular_function
OG_10551	AT5G43750.1	GO:0006950; GO:0009058; GO:0044281; GO:0006629; GO:0061024; GO:0009536; GO:0009579; GO:0042592; GO:0006810	response to stress; biosynthetic process; small molecule metabolic process; lipid metabolic process; membrane organization; plastid; thylakoid; homeostatic process; transport
OG_10558	AT2G29660.1	GO:0009058; GO:0044281; GO:0006629; GO:0043167; GO:0003674; GO:0034641; GO:0008150; GO:0001071; GO:0005576; GO:0005575; GO:0043234; GO:0005622; GO:0016757	biosynthetic process; small molecule metabolic process; lipid metabolic process; ion binding; molecular_function; cellular nitrogen compound metabolic process; biological_process; nucleic acid binding transcription factor activity; extracellular region; cellular_component; protein complex; intracellular; transferase activity, transferring glycosyl groups
OG_10563	AT3G02700.1	GO:0007165; GO:0009056; GO:0044281; GO:0006629	signal transduction; catabolic process; small molecule metabolic process; lipid metabolic process
OG_10564	AT2G27100.1	GO:0003674; GO:0005654; GO:0034641; GO:0009536; GO:0005730; GO:0005829; GO:0048856; GO:0008150; GO:0003677; GO:0001071; GO:0009058; GO:0007049; GO:0006464; GO:0006397; GO:0051276; GO:0043234; GO:0005622; GO:0043167	molecular_function; nucleoplasm; cellular nitrogen compound metabolic process; plastid; nucleolus; cytosol; anatomical structure development; biological_process; DNA binding; nucleic acid binding transcription factor activity; biosynthetic process; cell cycle; cellular protein modification process; mRNA processing; chromosome organization; protein complex; intracellular; ion binding
OG_10576	AT4G20310.2	GO:0005739; GO:0005575; GO:0008233; GO:0008150	mitochondrion; cellular_component; peptidase activity; biological_process
OG_10585	AT1G12244.1	GO:0009536; GO:0003674; GO:0006259; GO:0006950	plastid; molecular_function; DNA metabolic process; response to stress
OG_10586	AT1G17330.1	GO:0005634	nucleus
OG_10594	AT5G56740.1	GO:0016746; GO:0005829; GO:0000003; GO:0048646; GO:0048856; GO:0006259; GO:0009058; GO:0005634; GO:0051276; GO:0006464; GO:0034641	transferase activity, transferring acyl groups; cytosol; reproduction; anatomical structure formation involved in morphogenesis; anatomical structure development; DNA metabolic process; biosynthetic process; nucleus; chromosome organization; cellular protein modification process; cellular nitrogen compound metabolic process
OG_10598	AT1G11890.1	GO:0006457; GO:0006950; GO:0005773; GO:0005794; GO:0016192; GO:0006810; GO:0008150; GO:0003674; GO:0005783; GO:0005886; GO:0005575	protein folding; response to stress; vacuole; Golgi apparatus; vesicle-mediated transport; transport; biological_process; molecular_function; endoplasmic reticulum; plasma membrane; cellular_component
OG_10600	AT3G46780.1	GO:0048856; GO:0006091; GO:0015979; GO:0034641; GO:0005975; GO:0009056; GO:0044281; GO:0051186; GO:0008150; GO:0009536; GO:0009058; GO:0006629; GO:0000229; GO:0006790; GO:0019748; GO:0009579; GO:0042254; GO:0061024	anatomical structure development; generation of precursor metabolites and energy; photosynthesis; cellular nitrogen compound metabolic process; carbohydrate metabolic process; catabolic process; small molecule metabolic process; cofactor metabolic process; biological_process; plastid; biosynthetic process; lipid metabolic process; cytoplasmic chromosome; sulfur compound metabolic process; seconda…
OG_10601	AT5G47580.1	GO:0005739; GO:0006464; GO:0009058; GO:0005975	mitochondrion; cellular protein modification process; biosynthetic process; carbohydrate metabolic process
OG_10602	AT4G16510.1	GO:0003674	molecular_function
OG_10618	AT4G08685.1	GO:0006950; GO:0006810; GO:0008150; GO:0071554; GO:0006790; GO:0006520; GO:0009058; GO:0005576	response to stress; transport; biological_process; cell wall organization or biogenesis; sulfur compound metabolic process; cellular amino acid metabolic process; biosynthetic process; extracellular region
OG_10623	AT1G07645.1	GO:0005576; GO:0006950; GO:0003674	extracellular region; response to stress; molecular_function
OG_10630	AT5G55130.2	GO:0008150; GO:0000003; GO:0043226; GO:0005622; GO:0006464; GO:0003674; GO:0005737; GO:0005623; GO:0043234	biological_process; reproduction; organelle; intracellular; cellular protein modification process; molecular_function; cytoplasm; cell; protein complex
OG_10631	AT3G20420.1	GO:0034641; GO:0000003; GO:0048856; GO:0005634; GO:0006259; GO:0004518; GO:0009790; GO:0002376; GO:0006950; GO:0008150; GO:0003723; GO:0005737; GO:0051301; GO:0007049; GO:0006397	cellular nitrogen compound metabolic process; reproduction; anatomical structure development; nucleus; DNA metabolic process; nuclease activity; embryo development; immune system process; response to stress; biological_process; RNA binding; cytoplasm; cell division; cell cycle; mRNA processing
OG_10639	AT4G12970.1	GO:0048856; GO:0007267; GO:0005576; GO:0008150; GO:0034641	anatomical structure development; cell-cell signaling; extracellular region; biological_process; cellular nitrogen compound metabolic process
OG_10644	AT2G37000.1	GO:0006950; GO:0048856; GO:0008150; GO:0003674; GO:0007165; GO:0006464; GO:0002376; GO:0008219; GO:0008283; GO:0003677; GO:0006605; GO:0061024; GO:0034641; GO:0009058; GO:0006259; GO:0007049; GO:0030154; GO:0000003; GO:0001071; GO:0007568; GO:0005634; GO:0043234; GO:0005622	response to stress; anatomical structure development; biological_process; molecular_function; signal transduction; cellular protein modification process; immune system process; cell death; cell proliferation; DNA binding; protein targeting; membrane organization; cellular nitrogen compound metabolic process; biosynthetic process; DNA metabolic process; cell cycle; cell differentiation; reproducti…
OG_10648	AT3G60300.1	GO:0000003; GO:0048856; GO:0005634; GO:0043167; GO:0003674	reproduction; anatomical structure development; nucleus; ion binding; molecular_function
OG_10652	AT5G58440.1	GO:0005623; GO:0043234; GO:0005768; GO:0043167; GO:0008289; GO:0051604; GO:0003674; GO:0008150; GO:0005829; GO:0007034; GO:0016192; GO:0005634; GO:0007165	cell; protein complex; endosome; ion binding; lipid binding; protein maturation; molecular_function; biological_process; cytosol; vacuolar transport; vesicle-mediated transport; nucleus; signal transduction
OG_10668	AT1G80920.1	GO:0009536; GO:0006457; GO:0008150; GO:0005783; GO:0016491; GO:0006950; GO:0005575; GO:0009579; GO:0005634; GO:0000902; GO:0000003; GO:0030154; GO:0040007	plastid; protein folding; biological_process; endoplasmic reticulum; oxidoreductase activity; response to stress; cellular_component; thylakoid; nucleus; cell morphogenesis; reproduction; cell differentiation; growth
OG_10671	AT1G27050.1	GO:0003674	molecular_function
OG_10672	AT1G10380.1	GO:0005576; GO:0003674	extracellular region; molecular_function
OG_10673	AT2G46710.1	GO:0071554; GO:0005975; GO:0051301; GO:0007049; GO:0006810; GO:0005618; GO:0007010; GO:0048856; GO:0030234; GO:0009058; GO:0030154; GO:0021700; GO:0008150; GO:0009536; GO:0008283; GO:0005886; GO:0007165	cell wall organization or biogenesis; carbohydrate metabolic process; cell division; cell cycle; transport; cell wall; cytoskeleton organization; anatomical structure development; enzyme regulator activity; biosynthetic process; cell differentiation; developmental maturation; biological_process; plastid; cell proliferation; plasma membrane; signal transduction
OG_10677	AT3G13235.3	GO:0008150; GO:0006464; GO:0009058; GO:0005975; GO:0005634; GO:0005829; GO:0003674; GO:0008233	biological_process; cellular protein modification process; biosynthetic process; carbohydrate metabolic process; nucleus; cytosol; molecular_function; peptidase activity
OG_10684	AT1G04985.1	GO:0005739	mitochondrion
OG_10685	AT5G35670.1	GO:0008150; GO:0006790; GO:0009058; GO:0005975; GO:0003674; GO:0005634	biological_process; sulfur compound metabolic process; biosynthetic process; carbohydrate metabolic process; molecular_function; nucleus
OG_10688	AT2G38730.1	GO:0006950; GO:0000003; GO:0048856; GO:0008150; GO:0009536; GO:0009579; GO:0019899; GO:0009058; GO:0006259; GO:0007049; GO:0006461; GO:0006464; GO:0048646; GO:0007165; GO:0042393; GO:0042254; GO:0034641; GO:0040007; GO:0003674; GO:0051186; GO:0006605; GO:0005773; GO:0005783; GO:0005886; GO:0005575; GO:0051276; GO:0005739; GO:0002376; GO:0005634; GO:0009056; GO:0006629; GO:0000902; GO:0005794; GO:…	response to stress; reproduction; anatomical structure development; biological_process; plastid; thylakoid; enzyme binding; biosynthetic process; DNA metabolic process; cell cycle; protein complex assembly; cellular protein modification process; anatomical structure formation involved in morphogenesis; signal transduction; histone binding; ribosome biogenesis; cellular nitrogen compound metabolic…
OG_10689	AT3G01800.1	GO:0006950; GO:0009536; GO:0009790; GO:0008150; GO:0002376; GO:0009579; GO:0006412; GO:0043167; GO:0006605; GO:0007005; GO:0044281; GO:0009058; GO:0006629; GO:0005739	response to stress; plastid; embryo development; biological_process; immune system process; thylakoid; translation; ion binding; protein targeting; mitochondrion organization; small molecule metabolic process; biosynthetic process; lipid metabolic process; mitochondrion
OG_10690	AT3G17660.1	GO:0000003; GO:0009790; GO:0048856; GO:0000902; GO:0030154; GO:0003674; GO:0008150; GO:0009058; GO:0006520; GO:0005794; GO:0043167; GO:0008289; GO:0016023; GO:0009536; GO:0007165; GO:0044281; GO:0034655; GO:0030234; GO:0005829; GO:0040007; GO:0005975; GO:0034641; GO:0005886; GO:0006605; GO:0051276; GO:0016192; GO:0006950; GO:0002376; GO:0003677; GO:0005773; GO:0006464; GO:0005634; GO:0005768	reproduction; embryo development; anatomical structure development; cell morphogenesis; cell differentiation; molecular_function; biological_process; biosynthetic process; cellular amino acid metabolic process; Golgi apparatus; ion binding; lipid binding; cytoplasmic membrane-bounded vesicle; plastid; signal transduction; small molecule metabolic process; nucleobase-containing compound catabolic …
OG_10695	AT3G18165.1	GO:0034641; GO:0005730; GO:0006950; GO:0007165; GO:0002376; GO:0003674; GO:0006397	cellular nitrogen compound metabolic process; nucleolus; response to stress; signal transduction; immune system process; molecular_function; mRNA processing
OG_10702	AT5G58130.1	GO:0003723; GO:0051604; GO:0005634; GO:0006259; GO:0008150; GO:0003674	RNA binding; protein maturation; nucleus; DNA metabolic process; biological_process; molecular_function
OG_10704	AT1G15440.2	GO:0008150; GO:0006913; GO:0009790; GO:0000003; GO:0048856; GO:0034641; GO:0009058; GO:0042254; GO:0043234; GO:0005622; GO:0007165; GO:0044281; GO:0003674; GO:0006605; GO:0007049; GO:0006464; GO:0006950; GO:0005737; GO:0005730; GO:0005575	biological_process; nucleocytoplasmic transport; embryo development; reproduction; anatomical structure development; cellular nitrogen compound metabolic process; biosynthetic process; ribosome biogenesis; protein complex; intracellular; signal transduction; small molecule metabolic process; molecular_function; protein targeting; cell cycle; cellular protein modification process; response to stre…
OG_10705	AT1G26340.1	GO:0005773; GO:0003674; GO:0009058; GO:0044281; GO:0006629; GO:0009536; GO:0048646; GO:0016491; GO:0071941; GO:0006950; GO:0005783; GO:0008150; GO:0005829; GO:0034641; GO:0006520; GO:0009056; GO:0006790; GO:0019748; GO:0009579; GO:0005886; GO:0005739; GO:0043234; GO:0005623	vacuole; molecular_function; biosynthetic process; small molecule metabolic process; lipid metabolic process; plastid; anatomical structure formation involved in morphogenesis; oxidoreductase activity; nitrogen cycle metabolic process; response to stress; endoplasmic reticulum; biological_process; cytosol; cellular nitrogen compound metabolic process; cellular amino acid metabolic process; catabo…
OG_10714	AT4G24090.1	GO:0048856; GO:0030154; GO:0009536; GO:0034641	anatomical structure development; cell differentiation; plastid; cellular nitrogen compound metabolic process
OG_10716	AT1G26940.1	GO:0048856; GO:0008150; GO:0005794; GO:0051276; GO:0000003; GO:0048646; GO:0006259; GO:0016853; GO:0006950; GO:0003674; GO:0006457; GO:0005768; GO:0005576; GO:0006464	anatomical structure development; biological_process; Golgi apparatus; chromosome organization; reproduction; anatomical structure formation involved in morphogenesis; DNA metabolic process; isomerase activity; response to stress; molecular_function; protein folding; endosome; extracellular region; cellular protein modification process
OG_10730	AT1G11680.1	GO:0034641; GO:0009058; GO:0044281; GO:0006629; GO:0000003; GO:0009790; GO:0008150; GO:0016491; GO:0006790; GO:0006520; GO:0005794; GO:0005576; GO:0003674; GO:0006950; GO:0005783; GO:0005886; GO:0043167	cellular nitrogen compound metabolic process; biosynthetic process; small molecule metabolic process; lipid metabolic process; reproduction; embryo development; biological_process; oxidoreductase activity; sulfur compound metabolic process; cellular amino acid metabolic process; Golgi apparatus; extracellular region; molecular_function; response to stress; endoplasmic reticulum; plasma membrane; …
OG_10731	AT1G12790.1	GO:0009536	plastid
OG_10735	AT4G28210.1	GO:0006399; GO:0000003; GO:0009790; GO:0008150; GO:0042254; GO:0034641; GO:0009536	tRNA metabolic process; reproduction; embryo development; biological_process; ribosome biogenesis; cellular nitrogen compound metabolic process; plastid
OG_10738	AT3G07800.1	GO:0016301; GO:0009536; GO:0044281; GO:0034641; GO:0009058; GO:0043167	kinase activity; plastid; small molecule metabolic process; cellular nitrogen compound metabolic process; biosynthetic process; ion binding
OG_10744	AT2G38120.1	GO:0006810; GO:0008150; GO:0009058; GO:0044281; GO:0006629; GO:0007155; GO:0048646; GO:0040007; GO:0007010; GO:0006461; GO:0048856; GO:0022857; GO:0043473; GO:0021700; GO:0030154; GO:0005794; GO:0005623; GO:0006790; GO:0051186; GO:0000902; GO:0005975; GO:0005768; GO:0005886; GO:0003674; GO:0071554	transport; biological_process; biosynthetic process; small molecule metabolic process; lipid metabolic process; cell adhesion; anatomical structure formation involved in morphogenesis; growth; cytoskeleton organization; protein complex assembly; anatomical structure development; transmembrane transporter activity; pigmentation; developmental maturation; cell differentiation; Golgi apparatus; cell…
OG_10746	AT1G74120.1	GO:0048856; GO:0008150; GO:0009536; GO:0006950; GO:0005739; GO:0034641; GO:0009058; GO:0003677	anatomical structure development; biological_process; plastid; response to stress; mitochondrion; cellular nitrogen compound metabolic process; biosynthetic process; DNA binding
OG_10750	AT3G53970.1	GO:0009056; GO:0000902; GO:0040007; GO:0006461; GO:0006950; GO:0009058; GO:0006259; GO:0007049	catabolic process; cell morphogenesis; growth; protein complex assembly; response to stress; biosynthetic process; DNA metabolic process; cell cycle
OG_10751	AT3G54000.1	GO:0005634	nucleus
OG_10752	AT4G21520.1	GO:0008150; GO:0043234; GO:0005622; GO:0003674; GO:0005737	biological_process; protein complex; intracellular; molecular_function; cytoplasm
OG_10753	AT3G56840.1	GO:0016491; GO:0005739; GO:0008150	oxidoreductase activity; mitochondrion; biological_process
OG_10756	AT2G31040.1	GO:0005886; GO:0009058; GO:0005975; GO:0008150	plasma membrane; biosynthetic process; carbohydrate metabolic process; biological_process
OG_10757	AT2G42620.1	GO:0009056; GO:0006950; GO:0008150; GO:0043234; GO:0005622; GO:0048856; GO:0044403; GO:0002376; GO:0006810; GO:0003674; GO:0006464; GO:0007568; GO:0005634	catabolic process; response to stress; biological_process; protein complex; intracellular; anatomical structure development; symbiosis, encompassing mutualism through parasitism; immune system process; transport; molecular_function; cellular protein modification process; aging; nucleus
OG_10760	AT5G08540.1	GO:0009536; GO:0009579	plastid; thylakoid
OG_10761	AT1G50370.1	GO:0009058; GO:0006464; GO:0008150; GO:0000003; GO:0009790; GO:0005622; GO:0043234; GO:0048856; GO:0005975; GO:0009056; GO:0019748; GO:0005737; GO:0005730; GO:0005829; GO:0016301; GO:0006810; GO:0005886; GO:0016791; GO:0006520	biosynthetic process; cellular protein modification process; biological_process; reproduction; embryo development; intracellular; protein complex; anatomical structure development; carbohydrate metabolic process; catabolic process; secondary metabolic process; cytoplasm; nucleolus; cytosol; kinase activity; transport; plasma membrane; phosphatase activity; cellular amino acid metabolic process
OG_10764	AT1G24095.1
OG_10765	AT1G24030.1	GO:0071554; GO:0005975; GO:0008150; GO:0007165; GO:0006950; GO:0002376; GO:0009058; GO:0005623; GO:0009536; GO:0005886; GO:0003674; GO:0000003; GO:0048856; GO:0006464; GO:0044281; GO:0040011; GO:0043167; GO:0016301	cell wall organization or biogenesis; carbohydrate metabolic process; biological_process; signal transduction; response to stress; immune system process; biosynthetic process; cell; plastid; plasma membrane; molecular_function; reproduction; anatomical structure development; cellular protein modification process; small molecule metabolic process; locomotion; ion binding; kinase activity
OG_10766	AT1G02260.1	GO:0005575; GO:0003674; GO:0055085	cellular_component; molecular_function; transmembrane transport
OG_10770	AT3G10030.1	GO:0006399; GO:0048856; GO:0006605; GO:0000003; GO:0009790; GO:0016301; GO:0009536; GO:0034655; GO:0009058; GO:0022607; GO:0005730; GO:0003677; GO:0008150; GO:0001071; GO:0034641; GO:0006520; GO:0006464; GO:0042254; GO:0044281; GO:0061024; GO:0043234; GO:0005622	tRNA metabolic process; anatomical structure development; protein targeting; reproduction; embryo development; kinase activity; plastid; nucleobase-containing compound catabolic process; biosynthetic process; cellular component assembly; nucleolus; DNA binding; biological_process; nucleic acid binding transcription factor activity; cellular nitrogen compound metabolic process; cellular amino acid…
OG_10776	AT4G09750.1	GO:0009058; GO:0044281; GO:0008150; GO:0009536; GO:0016491; GO:0006629; GO:0005975; GO:0034641; GO:0048856; GO:0005575	biosynthetic process; small molecule metabolic process; biological_process; plastid; oxidoreductase activity; lipid metabolic process; carbohydrate metabolic process; cellular nitrogen compound metabolic process; anatomical structure development; cellular_component
OG_10778	AT1G60000.1	GO:0034641; GO:0003674; GO:0009058; GO:0006629; GO:0006950; GO:0008150; GO:0001071; GO:0016301; GO:0005777; GO:0000003; GO:0048856; GO:0043167; GO:0002376; GO:0008219; GO:0003677; GO:0009536; GO:0006790; GO:0006520; GO:0016491; GO:0008168; GO:0044281; GO:0005829; GO:0003723; GO:0006810; GO:0005575; GO:0006397; GO:0015979; GO:0005618; GO:0005886; GO:0006605; GO:0006464; GO:0051276; GO:0009056; GO:…	cellular nitrogen compound metabolic process; molecular_function; biosynthetic process; lipid metabolic process; response to stress; biological_process; nucleic acid binding transcription factor activity; kinase activity; peroxisome; reproduction; anatomical structure development; ion binding; immune system process; cell death; DNA binding; plastid; sulfur compound metabolic process; cellular ami…
OG_10779	AT1G67570.1	GO:0048856; GO:0034641; GO:0009058; GO:0000003; GO:0051301; GO:0006259; GO:0007049; GO:0040007; GO:0008150; GO:0007059; GO:0051276; GO:0006464; GO:0005886; GO:0005634	anatomical structure development; cellular nitrogen compound metabolic process; biosynthetic process; reproduction; cell division; DNA metabolic process; cell cycle; growth; biological_process; chromosome segregation; chromosome organization; cellular protein modification process; plasma membrane; nucleus
OG_10789	AT5G40950.1	GO:0005840; GO:0009536; GO:0003735; GO:0009579; GO:0006412; GO:0005739; GO:0042254	ribosome; plastid; structural constituent of ribosome; thylakoid; translation; mitochondrion; ribosome biogenesis
OG_10793	AT5G02310.1	GO:0009058; GO:0008150; GO:0009056; GO:0006629; GO:0048856; GO:0003674; GO:0005634; GO:0006464; GO:0043167	biosynthetic process; biological_process; catabolic process; lipid metabolic process; anatomical structure development; molecular_function; nucleus; cellular protein modification process; ion binding
OG_10799	AT1G04555.1	GO:0005739	mitochondrion
OG_10801	AT3G14750.1	GO:0000003; GO:0048856; GO:0005634	reproduction; anatomical structure development; nucleus
OG_10802	AT2G44420.1	GO:0009058; GO:0006464; GO:0007165; GO:0009536; GO:0016810; GO:0006520; GO:0034641	biosynthetic process; cellular protein modification process; signal transduction; plastid; hydrolase activity, acting on carbon-nitrogen (but not peptide) bonds; cellular amino acid metabolic process; cellular nitrogen compound metabolic process
OG_10806	AT1G13330.1	GO:0008150; GO:0007165; GO:0005829; GO:0016301; GO:0004871; GO:0048856; GO:0000003; GO:0051276; GO:0022607; GO:0051301; GO:0007049; GO:0006950; GO:0006259; GO:0009058; GO:0019899; GO:0005634	biological_process; signal transduction; cytosol; kinase activity; signal transducer activity; anatomical structure development; reproduction; chromosome organization; cellular component assembly; cell division; cell cycle; response to stress; DNA metabolic process; biosynthetic process; enzyme binding; nucleus
OG_10810	AT3G55070.2	GO:0005634; GO:0005829; GO:0003674	nucleus; cytosol; molecular_function
OG_10813	AT5G12320.1	GO:0000902; GO:0008150; GO:0009058; GO:0022857; GO:0005783; GO:0009536; GO:0007059; GO:0043167; GO:0008289; GO:0034641; GO:0006464; GO:0006950; GO:0002376; GO:0040007; GO:0006629; GO:0006605; GO:0048856; GO:0000003; GO:0051301; GO:0007049; GO:0005618; GO:0003674; GO:0005777; GO:0006259; GO:0016192; GO:0051276; GO:0005634; GO:0006457; GO:0009056; GO:0006810; GO:0043234; GO:0005886	cell morphogenesis; biological_process; biosynthetic process; transmembrane transporter activity; endoplasmic reticulum; plastid; chromosome segregation; ion binding; lipid binding; cellular nitrogen compound metabolic process; cellular protein modification process; response to stress; immune system process; growth; lipid metabolic process; protein targeting; anatomical structure development; rep…
OG_10815	AT3G13450.1	GO:0008150; GO:0016491; GO:0006950; GO:0006520; GO:0009056; GO:0043234; GO:0005739	biological_process; oxidoreductase activity; response to stress; cellular amino acid metabolic process; catabolic process; protein complex; mitochondrion
OG_10817	AT5G55500.1	GO:0005794; GO:0006605; GO:0055085; GO:0061024; GO:0009058; GO:0006464; GO:0005576; GO:0016757; GO:0005975	Golgi apparatus; protein targeting; transmembrane transport; membrane organization; biosynthetic process; cellular protein modification process; extracellular region; transferase activity, transferring glycosyl groups; carbohydrate metabolic process
OG_10819	AT1G71950.1	GO:0005773; GO:0008150; GO:0005576; GO:0005618; GO:0005829; GO:0009058; GO:0006629; GO:0005886; GO:0048856	vacuole; biological_process; extracellular region; cell wall; cytosol; biosynthetic process; lipid metabolic process; plasma membrane; anatomical structure development
OG_10820	AT3G63510.1	GO:0005737; GO:0009056; GO:0044281; GO:0008150; GO:0009536; GO:0005634; GO:0034641; GO:0006399; GO:0016491; GO:0043167	cytoplasm; catabolic process; small molecule metabolic process; biological_process; plastid; nucleus; cellular nitrogen compound metabolic process; tRNA metabolic process; oxidoreductase activity; ion binding
OG_10829	AT3G29010.1	GO:0005737; GO:0006464	cytoplasm; cellular protein modification process
OG_10831	AT2G34620.1	GO:0000003; GO:0009790; GO:0006950; GO:0009536; GO:0048856; GO:0008150; GO:0003677; GO:0005739; GO:0034641; GO:0009058	reproduction; embryo development; response to stress; plastid; anatomical structure development; biological_process; DNA binding; mitochondrion; cellular nitrogen compound metabolic process; biosynthetic process
OG_10838	AT4G23890.1	GO:0006464; GO:0008150; GO:0006810; GO:0009536; GO:0009579; GO:0042592	cellular protein modification process; biological_process; transport; plastid; thylakoid; homeostatic process
OG_10839	AT3G08490.1	GO:0005634	nucleus
OG_10840	AT5G13720.1	GO:0009536	plastid
OG_10841	AT4G00050.1	GO:0001071; GO:0009058; GO:0051186; GO:0007165; GO:0044281; GO:0006629; GO:0048856; GO:0002376; GO:0006950; GO:0008219; GO:0006790; GO:0019748; GO:0034641; GO:0003677; GO:0042592; GO:0008150; GO:0006520; GO:0003674; GO:0005575; GO:0000003; GO:0006605; GO:0061024; GO:0006464; GO:0005654; GO:0021700; GO:0030154; GO:0009056; GO:0043234; GO:0005622	nucleic acid binding transcription factor activity; biosynthetic process; cofactor metabolic process; signal transduction; small molecule metabolic process; lipid metabolic process; anatomical structure development; immune system process; response to stress; cell death; sulfur compound metabolic process; secondary metabolic process; cellular nitrogen compound metabolic process; DNA binding; homeo…
OG_10844	AT1G15980.1	GO:0043234; GO:0005622; GO:0034641; GO:0005975; GO:0009056; GO:0044281; GO:0051186; GO:0006091; GO:0015979; GO:0009058; GO:0006629; GO:0009536; GO:0009579; GO:0006461	protein complex; intracellular; cellular nitrogen compound metabolic process; carbohydrate metabolic process; catabolic process; small molecule metabolic process; cofactor metabolic process; generation of precursor metabolites and energy; photosynthesis; biosynthetic process; lipid metabolic process; plastid; thylakoid; protein complex assembly
OG_10851	AT3G08550.1	GO:0008150; GO:0005794; GO:0009058; GO:0044281; GO:0006629; GO:0071554; GO:0040007; GO:0034330; GO:0005576; GO:0000902; GO:0006790; GO:0051186; GO:0016757; GO:0005975; GO:0016192; GO:0005768; GO:0009579; GO:0009536; GO:0005886	biological_process; Golgi apparatus; biosynthetic process; small molecule metabolic process; lipid metabolic process; cell wall organization or biogenesis; growth; cell junction organization; extracellular region; cell morphogenesis; sulfur compound metabolic process; cofactor metabolic process; transferase activity, transferring glycosyl groups; carbohydrate metabolic process; vesicle-mediated t…
OG_10852	AT4G31560.1	GO:0006461; GO:0009058; GO:0006629; GO:0009579; GO:0009536	protein complex assembly; biosynthetic process; lipid metabolic process; thylakoid; plastid
OG_10870	ATCG00790.1	GO:0006412; GO:0005840; GO:0005739; GO:0006091; GO:0015979; GO:0009536; GO:0034641; GO:0009058; GO:0003735; GO:0042254; GO:0019843	translation; ribosome; mitochondrion; generation of precursor metabolites and energy; photosynthesis; plastid; cellular nitrogen compound metabolic process; biosynthetic process; structural constituent of ribosome; ribosome biogenesis; rRNA binding
OG_10872	AT5G13970.1	GO:0005634	nucleus
OG_10873	AT3G26760.1	GO:0048856; GO:0008150; GO:0016491; GO:0043167; GO:0006950; GO:0071554; GO:0005829; GO:0044281; GO:0009058; GO:0006629; GO:0019748; GO:0006520; GO:0005739	anatomical structure development; biological_process; oxidoreductase activity; ion binding; response to stress; cell wall organization or biogenesis; cytosol; small molecule metabolic process; biosynthetic process; lipid metabolic process; secondary metabolic process; cellular amino acid metabolic process; mitochondrion
OG_10874	AT5G25752.1	GO:0044281; GO:0006629; GO:0005575; GO:0005886; GO:0009536; GO:0005739; GO:0008233; GO:0008150	small molecule metabolic process; lipid metabolic process; cellular_component; plasma membrane; plastid; mitochondrion; peptidase activity; biological_process
OG_10882	AT2G23470.1	GO:0009536	plastid
OG_10889	AT2G25720.1
OG_10899	AT1G18440.1	GO:0006412; GO:0034641; GO:0009058; GO:0051186; GO:0005739; GO:0003674; GO:0048856; GO:0030154; GO:0009536	translation; cellular nitrogen compound metabolic process; biosynthetic process; cofactor metabolic process; mitochondrion; molecular_function; anatomical structure development; cell differentiation; plastid
OG_10900	AT1G73920.2	GO:0003674; GO:0051186; GO:0043226; GO:0005622; GO:0009058; GO:0044281; GO:0008150; GO:0005576; GO:0006629; GO:0006790; GO:0006520; GO:0005737; GO:0009056	molecular_function; cofactor metabolic process; organelle; intracellular; biosynthetic process; small molecule metabolic process; biological_process; extracellular region; lipid metabolic process; sulfur compound metabolic process; cellular amino acid metabolic process; cytoplasm; catabolic process
OG_10914	AT1G27430.1	GO:0003674	molecular_function
OG_10915	AT3G09430.1	GO:0005634	nucleus
OG_10916	AT5G60840.1	GO:0005634	nucleus
OG_10924	AT5G20140.2	GO:0009536; GO:0009058; GO:0006629; GO:0009579	plastid; biosynthetic process; lipid metabolic process; thylakoid
OG_10927	AT5G06170.1	GO:0006950; GO:0022857; GO:0003674; GO:0005773; GO:0008150; GO:0005794; GO:0000003; GO:0043226; GO:0005622; GO:0006810; GO:0005623; GO:0005575; GO:0055085; GO:0048856; GO:0005886	response to stress; transmembrane transporter activity; molecular_function; vacuole; biological_process; Golgi apparatus; reproduction; organelle; intracellular; transport; cell; cellular_component; transmembrane transport; anatomical structure development; plasma membrane
OG_10929	AT5G13410.1	GO:0003674; GO:0008150; GO:0016853; GO:0009579; GO:0009536; GO:0006464; GO:0006457	molecular_function; biological_process; isomerase activity; thylakoid; plastid; cellular protein modification process; protein folding
OG_10935	AT5G64250.1	GO:0006520; GO:0008150; GO:0005829; GO:0005739; GO:0016491	cellular amino acid metabolic process; biological_process; cytosol; mitochondrion; oxidoreductase activity
OG_10941	AT1G18335.1	GO:0016746; GO:0005634; GO:0009058	transferase activity, transferring acyl groups; nucleus; biosynthetic process
OG_8076	AT3G11830.1	GO:0009058; GO:0005975; GO:0005886; GO:0071554; GO:0006950; GO:0008150; GO:0005618; GO:0009536; GO:0005829; GO:0006091; GO:0009056; GO:0048856; GO:0034641; GO:0043167; GO:0051082; GO:0006457	biosynthetic process; carbohydrate metabolic process; plasma membrane; cell wall organization or biogenesis; response to stress; biological_process; cell wall; plastid; cytosol; generation of precursor metabolites and energy; catabolic process; anatomical structure development; cellular nitrogen compound metabolic process; ion binding; unfolded protein binding; protein folding
OG_8227	AT5G14850.2	GO:0016757; GO:0005783; GO:0006629; GO:0005634; GO:0043234; GO:0005794	transferase activity, transferring glycosyl groups; endoplasmic reticulum; lipid metabolic process; nucleus; protein complex; Golgi apparatus
OG_8934	AT3G17820.1	GO:0008150; GO:0006810; GO:0034641; GO:0005975; GO:0009056; GO:0044281; GO:0051186; GO:0009536; GO:0006950; GO:0005576; GO:0003674; GO:0005773; GO:0005840; GO:0005829; GO:0042592; GO:0071941; GO:0006520; GO:0009058; GO:0005618; GO:0019748; GO:0006091; GO:0007568; GO:0048856; GO:0016874; GO:0006790; GO:0005575; GO:0009579; GO:0005886; GO:0043167; GO:0005739; GO:0071554	biological_process; transport; cellular nitrogen compound metabolic process; carbohydrate metabolic process; catabolic process; small molecule metabolic process; cofactor metabolic process; plastid; response to stress; extracellular region; molecular_function; vacuole; ribosome; cytosol; homeostatic process; nitrogen cycle metabolic process; cellular amino acid metabolic process; biosynthetic pro…
OG_9045	AT2G21960.1	GO:0034641; GO:0005975; GO:0009056; GO:0044281; GO:0051186; GO:0009536; GO:0009579	cellular nitrogen compound metabolic process; carbohydrate metabolic process; catabolic process; small molecule metabolic process; cofactor metabolic process; plastid; thylakoid
OG_9046	AT1G56180.1	GO:0009536	plastid
OG_9107	AT1G20930.1	GO:0000003; GO:0009790; GO:0048856; GO:0051301; GO:0007049; GO:0005622; GO:0043234; GO:0008283; GO:0048646; GO:0005829; GO:0051276; GO:0006464; GO:0044403; GO:0034641; GO:0009058; GO:0005856; GO:0005737; GO:0005654; GO:0006950; GO:0005886; GO:0006259; GO:0000902; GO:0040007; GO:0016301; GO:0030154; GO:0008150; GO:0003674; GO:0007165; GO:0007010; GO:0006461; GO:0006397; GO:0005975; GO:0006520; GO:…	reproduction; embryo development; anatomical structure development; cell division; cell cycle; intracellular; protein complex; cell proliferation; anatomical structure formation involved in morphogenesis; cytosol; chromosome organization; cellular protein modification process; symbiosis, encompassing mutualism through parasitism; cellular nitrogen compound metabolic process; biosynthetic process;…
OG_9360	AT1G09800.1	GO:0016853; GO:0009056; GO:0044281; GO:0005634; GO:0034641; GO:0003723	isomerase activity; catabolic process; small molecule metabolic process; nucleus; cellular nitrogen compound metabolic process; RNA binding
OG_9363	AT1G60870.1	GO:0048856; GO:0006950; GO:0009056; GO:0000003; GO:0009790; GO:0005886	anatomical structure development; response to stress; catabolic process; reproduction; embryo development; plasma membrane
OG_9371	AT5G09730.1	GO:0016798; GO:0005773; GO:0005576; GO:0005618; GO:0008150; GO:0009536; GO:0000003; GO:0048856; GO:0005575; GO:0005975; GO:0009056; GO:0071554; GO:0034641; GO:0044281	hydrolase activity, acting on glycosyl bonds; vacuole; extracellular region; cell wall; biological_process; plastid; reproduction; anatomical structure development; cellular_component; carbohydrate metabolic process; catabolic process; cell wall organization or biogenesis; cellular nitrogen compound metabolic process; small molecule metabolic process
OG_9381	AT2G04305.1	GO:0006950; GO:0002376; GO:0061024; GO:0007165; GO:0005886; GO:0044281; GO:0009058; GO:0055085; GO:0022857; GO:0006810	response to stress; immune system process; membrane organization; signal transduction; plasma membrane; small molecule metabolic process; biosynthetic process; transmembrane transport; transmembrane transporter activity; transport
OG_9383	AT3G25660.1	GO:0016810; GO:0034641; GO:0009058; GO:0044281; GO:0009536; GO:0008150; GO:0006810; GO:0005829; GO:0016874; GO:0006605; GO:0006629; GO:0006520; GO:0009056; GO:0006412	hydrolase activity, acting on carbon-nitrogen (but not peptide) bonds; cellular nitrogen compound metabolic process; biosynthetic process; small molecule metabolic process; plastid; biological_process; transport; cytosol; ligase activity; protein targeting; lipid metabolic process; cellular amino acid metabolic process; catabolic process; translation
OG_9384	AT5G64510.1	GO:0048856; GO:0006457; GO:0008150; GO:0007165; GO:0006950; GO:0009536; GO:0005783	anatomical structure development; protein folding; biological_process; signal transduction; response to stress; plastid; endoplasmic reticulum
OG_9385	AT2G14260.2	GO:0005829; GO:0009536; GO:0008150; GO:0008233	cytosol; plastid; biological_process; peptidase activity
OG_9387	AT4G03270.1	GO:0048856; GO:0000003; GO:0051301; GO:0007049; GO:0008150; GO:0006464; GO:0005737; GO:0040007; GO:0009058; GO:0006259; GO:0003674; GO:0016301; GO:0051276; GO:0005634; GO:0006520	anatomical structure development; reproduction; cell division; cell cycle; biological_process; cellular protein modification process; cytoplasm; growth; biosynthetic process; DNA metabolic process; molecular_function; kinase activity; chromosome organization; nucleus; cellular amino acid metabolic process
OG_9392	AT4G04955.1	GO:0016810; GO:0034641; GO:0009056; GO:0006950; GO:0005783; GO:0044281; GO:0043167	hydrolase activity, acting on carbon-nitrogen (but not peptide) bonds; cellular nitrogen compound metabolic process; catabolic process; response to stress; endoplasmic reticulum; small molecule metabolic process; ion binding
OG_9397	AT1G28510.1	GO:0005739	mitochondrion
OG_9398	AT1G28690.1	GO:0034641; GO:0007165; GO:0009536; GO:0005575; GO:0005739; GO:0003674	cellular nitrogen compound metabolic process; signal transduction; plastid; cellular_component; mitochondrion; molecular_function
OG_9404	AT3G62540.1	GO:0005739; GO:0034641; GO:0003674	mitochondrion; cellular nitrogen compound metabolic process; molecular_function
OG_9406	AT1G29800.2	GO:0043226; GO:0005622; GO:0043167; GO:0008289; GO:0007165; GO:0008150; GO:0005737; GO:0009056	organelle; intracellular; ion binding; lipid binding; signal transduction; biological_process; cytoplasm; catabolic process
OG_9409	AT5G46550.1	GO:0000003; GO:0048856; GO:0016746; GO:0006790; GO:0009058; GO:0005975; GO:0019748; GO:0042393; GO:0008150; GO:0005654; GO:0043234; GO:0007049; GO:0006950; GO:0009536; GO:0034655; GO:0006464; GO:0003677; GO:0051276; GO:0005575; GO:0034641; GO:0002376	reproduction; anatomical structure development; transferase activity, transferring acyl groups; sulfur compound metabolic process; biosynthetic process; carbohydrate metabolic process; secondary metabolic process; histone binding; biological_process; nucleoplasm; protein complex; cell cycle; response to stress; plastid; nucleobase-containing compound catabolic process; cellular protein modificati…
OG_9410	AT2G25950.1	GO:0005634	nucleus
OG_9411	AT2G34640.1	GO:0009536; GO:0000229; GO:0034641; GO:0009058; GO:0008283; GO:0005634	plastid; cytoplasmic chromosome; cellular nitrogen compound metabolic process; biosynthetic process; cell proliferation; nucleus
OG_9412	AT3G25210.1	GO:0008150; GO:0000003; GO:0048856; GO:0005975; GO:0005739	biological_process; reproduction; anatomical structure development; carbohydrate metabolic process; mitochondrion
OG_9420	AT1G49470.1
OG_9426	AT4G04180.1	GO:0048856; GO:0005622; GO:0043234; GO:0000003; GO:0005829; GO:0006810; GO:0005654; GO:0008150; GO:0006461; GO:0000902; GO:0030154; GO:0009056; GO:0005886; GO:0007010; GO:0005975; GO:0005794; GO:0003674; GO:0009058; GO:0016887; GO:0071554; GO:0006464; GO:0040007; GO:0016192; GO:0006950; GO:0005730; GO:0043167	anatomical structure development; intracellular; protein complex; reproduction; cytosol; transport; nucleoplasm; biological_process; protein complex assembly; cell morphogenesis; cell differentiation; catabolic process; plasma membrane; cytoskeleton organization; carbohydrate metabolic process; Golgi apparatus; molecular_function; biosynthetic process; ATPase activity; cell wall organization or b…
OG_9428	AT4G22340.1	GO:0005739; GO:0044281; GO:0009058; GO:0006629; GO:0016779; GO:0005575; GO:0005783	mitochondrion; small molecule metabolic process; biosynthetic process; lipid metabolic process; nucleotidyltransferase activity; cellular_component; endoplasmic reticulum
OG_9431	AT5G03455.1	GO:0016791; GO:0003674; GO:0016491; GO:0006464; GO:0008150; GO:0009536; GO:0005634; GO:0005739; GO:0006520	phosphatase activity; molecular_function; oxidoreductase activity; cellular protein modification process; biological_process; plastid; nucleus; mitochondrion; cellular amino acid metabolic process
OG_9437	AT5G03870.1	GO:0008150; GO:0022607; GO:0007010; GO:0005575; GO:0005856; GO:0043234; GO:0000003; GO:0048856; GO:0005634; GO:0005886; GO:0003674; GO:0042592; GO:0016491	biological_process; cellular component assembly; cytoskeleton organization; cellular_component; cytoskeleton; protein complex; reproduction; anatomical structure development; nucleus; plasma membrane; molecular_function; homeostatic process; oxidoreductase activity
OG_9447	AT4G03140.1	GO:0048856; GO:0008150; GO:0016491; GO:0043167; GO:0006950; GO:0071554; GO:0009536; GO:0005829; GO:0044281; GO:0009058; GO:0006629; GO:0019748; GO:0006520; GO:0005739	anatomical structure development; biological_process; oxidoreductase activity; ion binding; response to stress; cell wall organization or biogenesis; plastid; cytosol; small molecule metabolic process; biosynthetic process; lipid metabolic process; secondary metabolic process; cellular amino acid metabolic process; mitochondrion
OG_9449	AT1G02970.1	GO:0048856; GO:0006259; GO:0009058; GO:0007049; GO:0051276; GO:0006464; GO:0008150; GO:0008283; GO:0051301; GO:0006950; GO:0002376; GO:0005634; GO:0016301; GO:0007010; GO:0006461; GO:0000003; GO:0007165; GO:0003674; GO:0006520; GO:0043167	anatomical structure development; DNA metabolic process; biosynthetic process; cell cycle; chromosome organization; cellular protein modification process; biological_process; cell proliferation; cell division; response to stress; immune system process; nucleus; kinase activity; cytoskeleton organization; protein complex assembly; reproduction; signal transduction; molecular_function; cellular ami…
OG_9450	AT2G47770.1	GO:0005794; GO:0051186; GO:0003674; GO:0008150; GO:0005783; GO:0006950; GO:0005739; GO:0005575	Golgi apparatus; cofactor metabolic process; molecular_function; biological_process; endoplasmic reticulum; response to stress; mitochondrion; cellular_component
OG_9451	AT4G02440.1	GO:0007165; GO:0009056; GO:0008150; GO:0000003; GO:0048856; GO:0003674; GO:0005634; GO:0006464	signal transduction; catabolic process; biological_process; reproduction; anatomical structure development; molecular_function; nucleus; cellular protein modification process
OG_9452	AT1G02700.1	GO:0006457; GO:0034641; GO:0009058; GO:0008150; GO:0006629; GO:0006950	protein folding; cellular nitrogen compound metabolic process; biosynthetic process; biological_process; lipid metabolic process; response to stress
OG_9454	AT2G47390.1	GO:0009536; GO:0008150; GO:0008233	plastid; biological_process; peptidase activity
OG_9456	AT4G01940.1	GO:0009058; GO:0022607; GO:0008150; GO:0009536; GO:0005198; GO:0003674; GO:0043167	biosynthetic process; cellular component assembly; biological_process; plastid; structural molecule activity; molecular_function; ion binding
OG_9458	AT3G62190.1	GO:0005737; GO:0006457; GO:0000003; GO:0048856	cytoplasm; protein folding; reproduction; anatomical structure development
OG_9460	AT4G01720.1	GO:0001071; GO:0034641; GO:0009058; GO:0006950; GO:0002376; GO:0044281; GO:0006790; GO:0019748; GO:0006810; GO:0009056; GO:0008150; GO:0008219; GO:0007165; GO:0044403; GO:0006605; GO:0061024; GO:0003677; GO:0003674; GO:0043167; GO:0000003; GO:0009790; GO:0005634; GO:0043234; GO:0005622	nucleic acid binding transcription factor activity; cellular nitrogen compound metabolic process; biosynthetic process; response to stress; immune system process; small molecule metabolic process; sulfur compound metabolic process; secondary metabolic process; transport; catabolic process; biological_process; cell death; signal transduction; symbiosis, encompassing mutualism through parasitism; p…
OG_9461	AT3G62030.3	GO:0009058; GO:0044281; GO:0006629; GO:0006091; GO:0015979; GO:0006950; GO:0008150; GO:0000003; GO:0048856; GO:0009536; GO:0009579; GO:0019899; GO:0006520; GO:0006259; GO:0007049; GO:0006461; GO:0009056; GO:0006464; GO:0048646; GO:0002376; GO:0007165; GO:0042393; GO:0006810; GO:0042254; GO:0034641; GO:0006913; GO:0040007; GO:0003674; GO:0051186; GO:0006790; GO:0006605; GO:0005773; GO:0005783; GO:…	biosynthetic process; small molecule metabolic process; lipid metabolic process; generation of precursor metabolites and energy; photosynthesis; response to stress; biological_process; reproduction; anatomical structure development; plastid; thylakoid; enzyme binding; cellular amino acid metabolic process; DNA metabolic process; cell cycle; protein complex assembly; catabolic process; cellular pr…
OG_9467	AT3G63140.1	GO:0048856; GO:0008150; GO:0006412; GO:0044281; GO:0009058; GO:0006629; GO:0034641; GO:0005975; GO:0009056; GO:0051186; GO:0006950; GO:0003723; GO:0003729; GO:0042254; GO:0009536; GO:0007165; GO:0000003; GO:0009579; GO:0003674; GO:0030154; GO:0005576; GO:0006091; GO:0006461; GO:0015979	anatomical structure development; biological_process; translation; small molecule metabolic process; biosynthetic process; lipid metabolic process; cellular nitrogen compound metabolic process; carbohydrate metabolic process; catabolic process; cofactor metabolic process; response to stress; RNA binding; mRNA binding; ribosome biogenesis; plastid; signal transduction; reproduction; thylakoid; mol…
OG_9471	AT3G05345.1	GO:0000003; GO:0048856; GO:0008150; GO:0009536; GO:0005783; GO:0009790; GO:0005794; GO:0009579; GO:0005886; GO:0048646; GO:0005739	reproduction; anatomical structure development; biological_process; plastid; endoplasmic reticulum; embryo development; Golgi apparatus; thylakoid; plasma membrane; anatomical structure formation involved in morphogenesis; mitochondrion
OG_9474	AT1G08960.1	GO:0022857; GO:0055085; GO:0005634; GO:0043226; GO:0005773; GO:0005886; GO:0006810; GO:0005575	transmembrane transporter activity; transmembrane transport; nucleus; organelle; vacuole; plasma membrane; transport; cellular_component
OG_9477	AT5G27290.1	GO:0042592; GO:0006810; GO:0009536	homeostatic process; transport; plastid
OG_9478	AT3G04970.2	GO:0048856; GO:0043226; GO:0005622; GO:0008150; GO:0000902; GO:0005576; GO:0006810; GO:0071554; GO:0040007; GO:0005886; GO:0005737; GO:0043167	anatomical structure development; organelle; intracellular; biological_process; cell morphogenesis; extracellular region; transport; cell wall organization or biogenesis; growth; plasma membrane; cytoplasm; ion binding
OG_9479	AT3G04950.1
OG_9482	AT1G54520.1	GO:0009536	plastid
OG_9495	AT2G46735.1
OG_9498	AT1G01630.1	GO:0006810; GO:0048856; GO:0040007; GO:0030154; GO:0021700; GO:0008150; GO:0003674; GO:0006790; GO:0006520; GO:0009058; GO:0005737; GO:0005634	transport; anatomical structure development; growth; cell differentiation; developmental maturation; biological_process; molecular_function; sulfur compound metabolic process; cellular amino acid metabolic process; biosynthetic process; cytoplasm; nucleus
OG_9506	AT5G05810.1	GO:0000003; GO:0009790; GO:0044281; GO:0009058; GO:0008150; GO:0002376; GO:0006950; GO:0008219; GO:0030154; GO:0021700; GO:0048856; GO:0007165; GO:0006605; GO:0061024; GO:0005886; GO:0003674; GO:0043167; GO:0006810; GO:0006464; GO:0005634; GO:0071554; GO:0005975; GO:0005576	reproduction; embryo development; small molecule metabolic process; biosynthetic process; biological_process; immune system process; response to stress; cell death; cell differentiation; developmental maturation; anatomical structure development; signal transduction; protein targeting; membrane organization; plasma membrane; molecular_function; ion binding; transport; cellular protein modificatio…
OG_9508	AT5G44250.1	GO:0005634; GO:0005777	nucleus; peroxisome
OG_9511	AT3G46630.1	GO:0003674; GO:0000003; GO:0048856; GO:0005634; GO:0043234; GO:0006259; GO:0051276; GO:0006950; GO:0009536; GO:0048646; GO:0034641; GO:0009058; GO:0005730; GO:0005654; GO:0008150; GO:0043167	molecular_function; reproduction; anatomical structure development; nucleus; protein complex; DNA metabolic process; chromosome organization; response to stress; plastid; anatomical structure formation involved in morphogenesis; cellular nitrogen compound metabolic process; biosynthetic process; nucleolus; nucleoplasm; biological_process; ion binding
OG_9513	AT5G65860.2	GO:0005737; GO:0044281; GO:0034641; GO:0009058; GO:0003674; GO:0008168	cytoplasm; small molecule metabolic process; cellular nitrogen compound metabolic process; biosynthetic process; molecular_function; methyltransferase activity
OG_9514	AT4G37630.2	GO:0048856; GO:0008150; GO:0007049; GO:0040007; GO:0000003; GO:0051301; GO:0006464; GO:0008283; GO:0009058; GO:0006259; GO:0003674; GO:0016301; GO:0051276; GO:0005634; GO:0006520	anatomical structure development; biological_process; cell cycle; growth; reproduction; cell division; cellular protein modification process; cell proliferation; biosynthetic process; DNA metabolic process; molecular_function; kinase activity; chromosome organization; nucleus; cellular amino acid metabolic process
OG_9519	AT2G43420.1	GO:0005575; GO:0016491; GO:0009058; GO:0006629; GO:0005783; GO:0005886; GO:0008150	cellular_component; oxidoreductase activity; biosynthetic process; lipid metabolic process; endoplasmic reticulum; plasma membrane; biological_process
OG_9520	AT5G10730.1	GO:0006950; GO:0005739; GO:0009058; GO:0044281; GO:0009579; GO:0009536; GO:0005886	response to stress; mitochondrion; biosynthetic process; small molecule metabolic process; thylakoid; plastid; plasma membrane
OG_9524	AT5G15450.1	GO:0006950; GO:0006457; GO:0008233; GO:0016887; GO:0043234; GO:0009536; GO:0005618; GO:0006412; GO:0008150; GO:0003674; GO:0009579; GO:0006605; GO:0055085; GO:0043167; GO:0034641; GO:0009058; GO:0051186; GO:0005739; GO:0006461; GO:0051604	response to stress; protein folding; peptidase activity; ATPase activity; protein complex; plastid; cell wall; translation; biological_process; molecular_function; thylakoid; protein targeting; transmembrane transport; ion binding; cellular nitrogen compound metabolic process; biosynthetic process; cofactor metabolic process; mitochondrion; protein complex assembly; protein maturation
OG_9525	AT5G11000.1	GO:0008150; GO:0009536; GO:0021700; GO:0030154; GO:0048856; GO:0040007; GO:0006810; GO:0006950; GO:0005886	biological_process; plastid; developmental maturation; cell differentiation; anatomical structure development; growth; transport; response to stress; plasma membrane
OG_9528	AT5G11270.1	GO:0006950; GO:0001071; GO:0007165; GO:0008150; GO:0009536; GO:0005634; GO:0043234; GO:0005622; GO:0003677	response to stress; nucleic acid binding transcription factor activity; signal transduction; biological_process; plastid; nucleus; protein complex; intracellular; DNA binding
OG_9529	AT5G11280.1	GO:0009536	plastid
OG_9536	AT4G31340.1	GO:0005975; GO:0005794; GO:0005773; GO:0005576; GO:0005783; GO:0009056	carbohydrate metabolic process; Golgi apparatus; vacuole; extracellular region; endoplasmic reticulum; catabolic process
OG_9541	AT5G11650.1	GO:0006950; GO:0043226; GO:0005622; GO:0071554; GO:0008150; GO:0003674; GO:0005737	response to stress; organelle; intracellular; cell wall organization or biogenesis; biological_process; molecular_function; cytoplasm
OG_9544	AT3G51320.1	GO:0034641; GO:0005739; GO:0003674	cellular nitrogen compound metabolic process; mitochondrion; molecular_function
OG_9545	AT1G75850.1	GO:0016192; GO:0009056; GO:0005623; GO:0043234; GO:0005768; GO:0006950; GO:0007034; GO:0006461; GO:0006810; GO:0009058; GO:0003674	vesicle-mediated transport; catabolic process; cell; protein complex; endosome; response to stress; vacuolar transport; protein complex assembly; transport; biosynthetic process; molecular_function
OG_9549	AT4G38630.1	GO:0007010; GO:0006950; GO:0000003; GO:0048646; GO:0009058; GO:0005975; GO:0009056; GO:0044281; GO:0006629; GO:0008150; GO:0006810; GO:0005575; GO:0006605; GO:0007034; GO:0004871; GO:0019748; GO:0006461; GO:0021700; GO:0030154; GO:0048856; GO:0040007; GO:0005829; GO:0006091; GO:0007568; GO:0005622; GO:0043234; GO:0005634; GO:0007165	cytoskeleton organization; response to stress; reproduction; anatomical structure formation involved in morphogenesis; biosynthetic process; carbohydrate metabolic process; catabolic process; small molecule metabolic process; lipid metabolic process; biological_process; transport; cellular_component; protein targeting; vacuolar transport; signal transducer activity; secondary metabolic process; p…
OG_9559	AT2G18350.1	GO:0048856; GO:0008150; GO:0003674; GO:0000003; GO:0009790; GO:0034641; GO:0009058; GO:0003677; GO:0001071; GO:0007165; GO:0005634; GO:0044281; GO:0006629; GO:0043234; GO:0005622	anatomical structure development; biological_process; molecular_function; reproduction; embryo development; cellular nitrogen compound metabolic process; biosynthetic process; DNA binding; nucleic acid binding transcription factor activity; signal transduction; nucleus; small molecule metabolic process; lipid metabolic process; protein complex; intracellular
OG_9562	AT3G50685.1	GO:0006790; GO:0009058; GO:0019748; GO:0006629; GO:0006464; GO:0005739	sulfur compound metabolic process; biosynthetic process; secondary metabolic process; lipid metabolic process; cellular protein modification process; mitochondrion
OG_9565	AT5G66631.1	GO:0048856; GO:0008150; GO:0000003; GO:0009536; GO:0003674	anatomical structure development; biological_process; reproduction; plastid; molecular_function
OG_9566	AT4G37130.1	GO:0003674; GO:0006913; GO:0005635; GO:0043234	molecular_function; nucleocytoplasmic transport; nuclear envelope; protein complex
OG_9570	AT3G19420.1	GO:0006790; GO:0044281; GO:0034641; GO:0009056; GO:0019748; GO:0006810; GO:0009058; GO:0006629; GO:0016853; GO:0005777; GO:0002376; GO:0006950; GO:0008219; GO:0008150; GO:0042592; GO:0005773; GO:0043167; GO:0008289; GO:0005829; GO:0022857; GO:0007165; GO:0005575; GO:0006091; GO:0015979; GO:0016798; GO:0009536; GO:0006605; GO:0061024; GO:0006520; GO:0048856; GO:0055085; GO:0005886; GO:0071554; GO:…	sulfur compound metabolic process; small molecule metabolic process; cellular nitrogen compound metabolic process; catabolic process; secondary metabolic process; transport; biosynthetic process; lipid metabolic process; isomerase activity; peroxisome; immune system process; response to stress; cell death; biological_process; homeostatic process; vacuole; ion binding; lipid binding; cytosol; tran…
OG_9574	AT1G64960.1	GO:0005634; GO:0005739; GO:0003674	nucleus; mitochondrion; molecular_function
OG_9579	AT2G22790.1	GO:0009536	plastid
OG_9580	AT1G60780.1	GO:0005829; GO:0016023; GO:0043234; GO:0022857; GO:0006464; GO:0009058; GO:0005975; GO:0006810; GO:0005886; GO:0005737; GO:0016192; GO:0003674	cytosol; cytoplasmic membrane-bounded vesicle; protein complex; transmembrane transporter activity; cellular protein modification process; biosynthetic process; carbohydrate metabolic process; transport; plasma membrane; cytoplasm; vesicle-mediated transport; molecular_function
OG_9582	AT1G32440.1	GO:0008150; GO:0016301; GO:0000003; GO:0048856; GO:0005975; GO:0005829; GO:0009058; GO:0044281; GO:0006629; GO:0006091; GO:0009056; GO:0009536; GO:0043167; GO:0005886; GO:0005739; GO:0034641	biological_process; kinase activity; reproduction; anatomical structure development; carbohydrate metabolic process; cytosol; biosynthetic process; small molecule metabolic process; lipid metabolic process; generation of precursor metabolites and energy; catabolic process; plastid; ion binding; plasma membrane; mitochondrion; cellular nitrogen compound metabolic process
OG_9588	AT5G41150.2	GO:0008150; GO:0006950; GO:0000003; GO:0007059; GO:0006259; GO:0051301; GO:0007049; GO:0003677; GO:0004518; GO:0005634; GO:0043234; GO:0034655	biological_process; response to stress; reproduction; chromosome segregation; DNA metabolic process; cell division; cell cycle; DNA binding; nuclease activity; nucleus; protein complex; nucleobase-containing compound catabolic process
OG_9589	AT5G13960.1	GO:0034641; GO:0048856; GO:0051276; GO:0000003; GO:0009058; GO:0051301; GO:0007049; GO:0005634; GO:0006259; GO:0006464; GO:0003674; GO:0003677; GO:0006950; GO:0044403; GO:0002376; GO:0007010; GO:0008168; GO:0008150; GO:0007267; GO:0008283; GO:0005694; GO:0042393; GO:0043167	cellular nitrogen compound metabolic process; anatomical structure development; chromosome organization; reproduction; biosynthetic process; cell division; cell cycle; nucleus; DNA metabolic process; cellular protein modification process; molecular_function; DNA binding; response to stress; symbiosis, encompassing mutualism through parasitism; immune system process; cytoskeleton organization; met…
OG_9590	AT4G17540.1
OG_9592	AT4G16760.1	GO:0008150; GO:0009056; GO:0044281; GO:0006629; GO:0016491; GO:0005777; GO:0009058; GO:0048856; GO:0006950; GO:0006790; GO:0051186; GO:0043167	biological_process; catabolic process; small molecule metabolic process; lipid metabolic process; oxidoreductase activity; peroxisome; biosynthetic process; anatomical structure development; response to stress; sulfur compound metabolic process; cofactor metabolic process; ion binding
OG_9594	AT4G12060.1	GO:0019899; GO:0008233; GO:0016887; GO:0005618; GO:0009536; GO:0034641; GO:0006520; GO:0009056; GO:0008150; GO:0009058; GO:0044281; GO:0003674; GO:0009579; GO:0006605; GO:0055085; GO:0043167; GO:0051186; GO:0005739; GO:0006461	enzyme binding; peptidase activity; ATPase activity; cell wall; plastid; cellular nitrogen compound metabolic process; cellular amino acid metabolic process; catabolic process; biological_process; biosynthetic process; small molecule metabolic process; molecular_function; thylakoid; protein targeting; transmembrane transport; ion binding; cofactor metabolic process; mitochondrion; protein complex…
OG_9595	AT4G11650.1	GO:0008150; GO:0006950; GO:0002376; GO:0005618; GO:0005773; GO:0009058; GO:0005576; GO:0005575	biological_process; response to stress; immune system process; cell wall; vacuole; biosynthetic process; extracellular region; cellular_component
OG_9612	AT1G04580.1	GO:0016491; GO:0005829; GO:0043167; GO:0005618; GO:0009058; GO:0006790; GO:0019748; GO:0019899; GO:0071554; GO:0044281; GO:0006629; GO:0005576; GO:0009536; GO:0005634; GO:0009056; GO:0034641; GO:0006520; GO:0008150; GO:0003674	oxidoreductase activity; cytosol; ion binding; cell wall; biosynthetic process; sulfur compound metabolic process; secondary metabolic process; enzyme binding; cell wall organization or biogenesis; small molecule metabolic process; lipid metabolic process; extracellular region; plastid; nucleus; catabolic process; cellular nitrogen compound metabolic process; cellular amino acid metabolic process…
OG_9615	AT5G12940.1	GO:0016301; GO:0008150; GO:0006950; GO:0005575; GO:0048856; GO:0007165; GO:0005618; GO:0005886; GO:0003674; GO:0006810; GO:0005576; GO:0009536; GO:0071554	kinase activity; biological_process; response to stress; cellular_component; anatomical structure development; signal transduction; cell wall; plasma membrane; molecular_function; transport; extracellular region; plastid; cell wall organization or biogenesis
OG_9623	AT1G54280.1	GO:0008150; GO:0006810; GO:0005794; GO:0048856; GO:0061024; GO:0016192; GO:0042592; GO:0009536; GO:0000003; GO:0005886; GO:0043167; GO:0016887; GO:0022857; GO:0003674; GO:0006950; GO:0005768; GO:0005575	biological_process; transport; Golgi apparatus; anatomical structure development; membrane organization; vesicle-mediated transport; homeostatic process; plastid; reproduction; plasma membrane; ion binding; ATPase activity; transmembrane transporter activity; molecular_function; response to stress; endosome; cellular_component
OG_9627	AT3G13780.1	GO:0005634; GO:0003674	nucleus; molecular_function
OG_9631	AT4G29220.1	GO:0007010; GO:0005829; GO:0043234; GO:0009058; GO:0005975; GO:0008150; GO:0009056; GO:0009536; GO:0006091; GO:0030154; GO:0048856; GO:0005886; GO:0016301; GO:0034641; GO:0044281; GO:0051186; GO:0043167	cytoskeleton organization; cytosol; protein complex; biosynthetic process; carbohydrate metabolic process; biological_process; catabolic process; plastid; generation of precursor metabolites and energy; cell differentiation; anatomical structure development; plasma membrane; kinase activity; cellular nitrogen compound metabolic process; small molecule metabolic process; cofactor metabolic process…
OG_9639	AT3G57350.1	GO:0042592; GO:0051276; GO:0006950; GO:0006259; GO:0034641; GO:0009058; GO:0003674; GO:0008150; GO:0000003; GO:0009790; GO:0006913; GO:0007059; GO:0051301; GO:0007049; GO:0005730; GO:0007165; GO:0048856; GO:0006464; GO:0030154; GO:0005575; GO:0005635; GO:0043234	homeostatic process; chromosome organization; response to stress; DNA metabolic process; cellular nitrogen compound metabolic process; biosynthetic process; molecular_function; biological_process; reproduction; embryo development; nucleocytoplasmic transport; chromosome segregation; cell division; cell cycle; nucleolus; signal transduction; anatomical structure development; cellular protein modif…
OG_9640	AT1G52590.1	GO:0009536	plastid
OG_9646	AT4G15910.1	GO:0006950; GO:0009058; GO:0006629; GO:0007165; GO:0002376; GO:0008219; GO:0006605; GO:0061024; GO:0009536; GO:0009790	response to stress; biosynthetic process; lipid metabolic process; signal transduction; immune system process; cell death; protein targeting; membrane organization; plastid; embryo development
OG_9650	AT3G16990.1
OG_9651	AT4G03430.1	GO:0008150; GO:0006950; GO:0006397; GO:0005634; GO:0003674	biological_process; response to stress; mRNA processing; nucleus; molecular_function
OG_9653	AT4G16130.1	GO:0016301; GO:0005975; GO:0005575; GO:0043167; GO:0009536; GO:0005829; GO:0034641; GO:0044281	kinase activity; carbohydrate metabolic process; cellular_component; ion binding; plastid; cytosol; cellular nitrogen compound metabolic process; small molecule metabolic process
OG_9657	AT5G20850.1	GO:0007049; GO:0008150; GO:0016887; GO:0003674; GO:0006259; GO:0009058; GO:0000003; GO:0051301; GO:0003677; GO:0034641; GO:0006950; GO:0051276; GO:0022607; GO:0005694; GO:0048856; GO:0005634; GO:0043167	cell cycle; biological_process; ATPase activity; molecular_function; DNA metabolic process; biosynthetic process; reproduction; cell division; DNA binding; cellular nitrogen compound metabolic process; response to stress; chromosome organization; cellular component assembly; chromosome; anatomical structure development; nucleus; ion binding
OG_9660	AT3G17210.1	GO:0005829; GO:0006950; GO:0009058; GO:0044281; GO:0006629; GO:0034641; GO:0051186; GO:0008150; GO:0006810; GO:0005975; GO:0006091; GO:0009056; GO:0009536; GO:0005886	cytosol; response to stress; biosynthetic process; small molecule metabolic process; lipid metabolic process; cellular nitrogen compound metabolic process; cofactor metabolic process; biological_process; transport; carbohydrate metabolic process; generation of precursor metabolites and energy; catabolic process; plastid; plasma membrane
OG_9667	AT4G29890.1	GO:0003674; GO:0009536; GO:0043167; GO:0008150; GO:0009056; GO:0016491	molecular_function; plastid; ion binding; biological_process; catabolic process; oxidoreductase activity
OG_9672	AT5G57460.1	GO:0005886; GO:0009536	plasma membrane; plastid
OG_9675	AT5G57660.1	GO:0001071; GO:0007165; GO:0008150; GO:0006950; GO:0009058; GO:0043167; GO:0003674; GO:0000003; GO:0048856; GO:0034641; GO:0048646; GO:0006810; GO:0005730; GO:0043234; GO:0005622	nucleic acid binding transcription factor activity; signal transduction; biological_process; response to stress; biosynthetic process; ion binding; molecular_function; reproduction; anatomical structure development; cellular nitrogen compound metabolic process; anatomical structure formation involved in morphogenesis; transport; nucleolus; protein complex; intracellular
OG_9676	AT1G07200.2	GO:0008150; GO:0009536; GO:0043167; GO:0006950; GO:0005575	biological_process; plastid; ion binding; response to stress; cellular_component
OG_9678	AT4G30840.1	GO:0006259; GO:0009058; GO:0003674; GO:0005635; GO:0009536	DNA metabolic process; biosynthetic process; molecular_function; nuclear envelope; plastid
OG_9679	AT2G39440.1	GO:0005634	nucleus
OG_9681	AT5G13510.1	GO:0048856; GO:0009536; GO:0006464; GO:0005840; GO:0005829; GO:0006412; GO:0006091; GO:0006461; GO:0015979; GO:0008150; GO:0034641; GO:0030154; GO:0009058; GO:0003735; GO:0042254; GO:0061024	anatomical structure development; plastid; cellular protein modification process; ribosome; cytosol; translation; generation of precursor metabolites and energy; protein complex assembly; photosynthesis; biological_process; cellular nitrogen compound metabolic process; cell differentiation; biosynthetic process; structural constituent of ribosome; ribosome biogenesis; membrane organization
OG_9685	AT4G04670.1	GO:0006810; GO:0009056; GO:0008150; GO:0000003; GO:0051301; GO:0007049; GO:0042592; GO:0051276; GO:0006950; GO:0006259; GO:0006399; GO:0009058; GO:0043226; GO:0005622; GO:0005737; GO:0034641; GO:0003674	transport; catabolic process; biological_process; reproduction; cell division; cell cycle; homeostatic process; chromosome organization; response to stress; DNA metabolic process; tRNA metabolic process; biosynthetic process; organelle; intracellular; cytoplasm; cellular nitrogen compound metabolic process; molecular_function
OG_9689	AT4G03960.1	GO:0007165; GO:0006464; GO:0008150; GO:0006950; GO:0005737; GO:0005634; GO:0016791	signal transduction; cellular protein modification process; biological_process; response to stress; cytoplasm; nucleus; phosphatase activity
OG_9690	AT4G05530.1	GO:0005773; GO:0009536; GO:0021700; GO:0030154; GO:0048856; GO:0040007; GO:0005777; GO:0016491; GO:0008150; GO:0006810; GO:0034641; GO:0044281; GO:0009056; GO:0006950	vacuole; plastid; developmental maturation; cell differentiation; anatomical structure development; growth; peroxisome; oxidoreductase activity; biological_process; transport; cellular nitrogen compound metabolic process; small molecule metabolic process; catabolic process; response to stress
OG_9697	AT3G62580.1	GO:0009536; GO:0005783	plastid; endoplasmic reticulum
OG_9703	AT3G09410.1	GO:0005618; GO:0005575; GO:0005886; GO:0005576; GO:0005829	cell wall; cellular_component; plasma membrane; extracellular region; cytosol
OG_9704	AT5G03560.2	GO:0006810; GO:0022857; GO:0008150; GO:0009536; GO:0003674	transport; transmembrane transporter activity; biological_process; plastid; molecular_function
OG_9707	AT1G56345.1	GO:0016853; GO:0006457; GO:0008150; GO:0006950; GO:0005739; GO:0003723; GO:0034641	isomerase activity; protein folding; biological_process; response to stress; mitochondrion; RNA binding; cellular nitrogen compound metabolic process
OG_9709	AT5G27030.1	GO:0034641; GO:0009058; GO:0003674; GO:0051301; GO:0007049; GO:0008150; GO:0051276; GO:0006464; GO:0005829; GO:0000003; GO:0009790; GO:0007165; GO:0007010; GO:0006605; GO:0006913; GO:0034655; GO:0048856; GO:0005634	cellular nitrogen compound metabolic process; biosynthetic process; molecular_function; cell division; cell cycle; biological_process; chromosome organization; cellular protein modification process; cytosol; reproduction; embryo development; signal transduction; cytoskeleton organization; protein targeting; nucleocytoplasmic transport; nucleobase-containing compound catabolic process; anatomical …
OG_9713	AT5G27395.2	GO:0005739	mitochondrion
OG_9715	AT5G27330.1	GO:0006605; GO:0006913; GO:0044281; GO:0034641; GO:0009058; GO:0005783	protein targeting; nucleocytoplasmic transport; small molecule metabolic process; cellular nitrogen compound metabolic process; biosynthetic process; endoplasmic reticulum
OG_9736	AT5G53540.1	GO:0008150; GO:0005768; GO:0040007; GO:0005622; GO:0043234; GO:0007059; GO:0005829; GO:0006810; GO:0051276; GO:0005575; GO:0006259; GO:0000003; GO:0051301; GO:0007049; GO:0000902; GO:0030154; GO:0005618; GO:0005886; GO:0006605; GO:0007010; GO:0003674; GO:0016887; GO:0048856; GO:0016192; GO:0006950; GO:0005730; GO:0006464; GO:0009058; GO:0005975; GO:0009056; GO:0071554; GO:0009536; GO:0043167	biological_process; endosome; growth; intracellular; protein complex; chromosome segregation; cytosol; transport; chromosome organization; cellular_component; DNA metabolic process; reproduction; cell division; cell cycle; cell morphogenesis; cell differentiation; cell wall; plasma membrane; protein targeting; cytoskeleton organization; molecular_function; ATPase activity; anatomical structure de…
OG_9737	AT5G54180.1	GO:0008150; GO:0009536; GO:0000229; GO:0000003; GO:0048856; GO:0009790; GO:0034641; GO:0009058; GO:0005739; GO:0003677	biological_process; plastid; cytoplasmic chromosome; reproduction; anatomical structure development; embryo development; cellular nitrogen compound metabolic process; biosynthetic process; mitochondrion; DNA binding
OG_9744	AT2G22010.1	GO:0005737; GO:0006464; GO:0007049; GO:0043167; GO:0003674; GO:0043234; GO:0005622; GO:0009056	cytoplasm; cellular protein modification process; cell cycle; ion binding; molecular_function; protein complex; intracellular; catabolic process
OG_9745	AT4G39520.1	GO:0006457; GO:0006950; GO:0016023; GO:0043167; GO:0009058; GO:0006629; GO:0009536; GO:0005829; GO:0034641; GO:0008150; GO:0003924; GO:0008289	protein folding; response to stress; cytoplasmic membrane-bounded vesicle; ion binding; biosynthetic process; lipid metabolic process; plastid; cytosol; cellular nitrogen compound metabolic process; biological_process; GTPase activity; lipid binding
OG_9753	AT4G33460.1	GO:0048856; GO:0000003; GO:0009790; GO:0030154; GO:0009056; GO:0008150; GO:0006810; GO:0006950; GO:0022857; GO:0009536; GO:0003674; GO:0005773; GO:0016887; GO:0007165; GO:0005575; GO:0043167	anatomical structure development; reproduction; embryo development; cell differentiation; catabolic process; biological_process; transport; response to stress; transmembrane transporter activity; plastid; molecular_function; vacuole; ATPase activity; signal transduction; cellular_component; ion binding
OG_9759	AT4G32915.1	GO:0005634; GO:0006412	nucleus; translation
OG_9761	AT4G10110.1	GO:0034641; GO:0040007; GO:0003674; GO:0000003; GO:0009790; GO:0008150; GO:0009536; GO:0009058; GO:0005730; GO:0003729	cellular nitrogen compound metabolic process; growth; molecular_function; reproduction; embryo development; biological_process; plastid; biosynthetic process; nucleolus; mRNA binding
OG_9764	AT1G76850.1	GO:0005829; GO:0000902; GO:0030154; GO:0071554; GO:0005575; GO:0007155; GO:0000003; GO:0040007; GO:0021700; GO:0048856; GO:0007010; GO:0006461; GO:0005794; GO:0005886; GO:0016192; GO:0005737; GO:0043234	cytosol; cell morphogenesis; cell differentiation; cell wall organization or biogenesis; cellular_component; cell adhesion; reproduction; growth; developmental maturation; anatomical structure development; cytoskeleton organization; protein complex assembly; Golgi apparatus; plasma membrane; vesicle-mediated transport; cytoplasm; protein complex
OG_9773	AT1G21090.1	GO:0005575; GO:0005886	cellular_component; plasma membrane
OG_9776	AT5G52880.1	GO:0005634; GO:0003674	nucleus; molecular_function
OG_9779	AT4G25570.1	GO:0040007; GO:0021700; GO:0030154; GO:0048856; GO:0005575; GO:0008150; GO:0009058; GO:0005975; GO:0000902; GO:0071554; GO:0043473; GO:0003674; GO:0005576; GO:0009536; GO:0005773; GO:0016491; GO:0006790; GO:0006520; GO:0005794	growth; developmental maturation; cell differentiation; anatomical structure development; cellular_component; biological_process; biosynthetic process; carbohydrate metabolic process; cell morphogenesis; cell wall organization or biogenesis; pigmentation; molecular_function; extracellular region; plastid; vacuole; oxidoreductase activity; sulfur compound metabolic process; cellular amino acid met…
OG_9781	AT2G17265.1	GO:0009058; GO:0006520; GO:0006790; GO:0008150; GO:0016301; GO:0009536; GO:0034641; GO:0043167	biosynthetic process; cellular amino acid metabolic process; sulfur compound metabolic process; biological_process; kinase activity; plastid; cellular nitrogen compound metabolic process; ion binding
OG_9787	AT5G51880.1	GO:0043167; GO:0008150; GO:0016491	ion binding; biological_process; oxidoreductase activity
OG_9789	AT5G51700.1
OG_9798	AT2G42490.1	GO:0009536; GO:0005777; GO:0008150; GO:0043167; GO:0009058; GO:0003674; GO:0016491	plastid; peroxisome; biological_process; ion binding; biosynthetic process; molecular_function; oxidoreductase activity
OG_9804	AT3G08940.2	GO:0006810; GO:0008150; GO:0009536; GO:0006464; GO:0005622; GO:0043234; GO:0003674; GO:0006091; GO:0015979; GO:0005575; GO:0006790; GO:0006520; GO:0009058; GO:0009579; GO:0042254; GO:0034641	transport; biological_process; plastid; cellular protein modification process; intracellular; protein complex; molecular_function; generation of precursor metabolites and energy; photosynthesis; cellular_component; sulfur compound metabolic process; cellular amino acid metabolic process; biosynthetic process; thylakoid; ribosome biogenesis; cellular nitrogen compound metabolic process
OG_9805	AT5G22800.1	GO:0005575; GO:0000003; GO:0009790; GO:0008150; GO:0009536; GO:0006399; GO:0006520; GO:0006412; GO:0005739; GO:0043167; GO:0003674; GO:0016874	cellular_component; reproduction; embryo development; biological_process; plastid; tRNA metabolic process; cellular amino acid metabolic process; translation; mitochondrion; ion binding; molecular_function; ligase activity
OG_9807	AT5G17670.1	GO:0009536; GO:0006629; GO:0003674; GO:0006810	plastid; lipid metabolic process; molecular_function; transport
OG_9808	AT3G48730.1	GO:0008150; GO:0048856; GO:0000003; GO:0006790; GO:0006520; GO:0009058; GO:0009536; GO:0034641; GO:0005975; GO:0009056; GO:0044281; GO:0051186; GO:0006950; GO:0042254; GO:0006605; GO:0030154; GO:0016853; GO:0043167; GO:0005576; GO:0003674	biological_process; anatomical structure development; reproduction; sulfur compound metabolic process; cellular amino acid metabolic process; biosynthetic process; plastid; cellular nitrogen compound metabolic process; carbohydrate metabolic process; catabolic process; small molecule metabolic process; cofactor metabolic process; response to stress; ribosome biogenesis; protein targeting; cell di…
OG_9811	AT2G20980.1	GO:0005634; GO:0006259; GO:0009058	nucleus; DNA metabolic process; biosynthetic process
OG_9812	AT2G16630.1	GO:0005576	extracellular region
OG_9813	AT4G34730.1	GO:0003723; GO:0009058; GO:0022607; GO:0042254; GO:0034641; GO:0061024; GO:0000003; GO:0048856; GO:0009536; GO:0009790	RNA binding; biosynthetic process; cellular component assembly; ribosome biogenesis; cellular nitrogen compound metabolic process; membrane organization; reproduction; anatomical structure development; plastid; embryo development
OG_9819	AT4G34460.3	GO:0016192; GO:0007165; GO:0006605; GO:0061024; GO:0048856; GO:0006950; GO:0008150; GO:0005634; GO:0006464; GO:0002376; GO:0008219; GO:0000003; GO:0007049; GO:0005783; GO:0009056; GO:0034641; GO:0009058; GO:0003924; GO:0003674; GO:0043234; GO:0005622; GO:0005886; GO:0030154; GO:0009790; GO:0051276	vesicle-mediated transport; signal transduction; protein targeting; membrane organization; anatomical structure development; response to stress; biological_process; nucleus; cellular protein modification process; immune system process; cell death; reproduction; cell cycle; endoplasmic reticulum; catabolic process; cellular nitrogen compound metabolic process; biosynthetic process; GTPase activity…
OG_9822	AT1G20670.1	GO:0048856; GO:0008150; GO:0005654; GO:0043234; GO:0006790; GO:0009058; GO:0005975; GO:0019748; GO:0006950; GO:0016746; GO:0000003; GO:0005575; GO:0003674; GO:0003677; GO:0051276; GO:0006464; GO:0002376; GO:0034641; GO:0009536	anatomical structure development; biological_process; nucleoplasm; protein complex; sulfur compound metabolic process; biosynthetic process; carbohydrate metabolic process; secondary metabolic process; response to stress; transferase activity, transferring acyl groups; reproduction; cellular_component; molecular_function; DNA binding; chromosome organization; cellular protein modification process…
OG_9825	AT4G38390.1	GO:0005794; GO:0008150; GO:0009058; GO:0009536; GO:0016757; GO:0005768; GO:0006950; GO:0005634	Golgi apparatus; biological_process; biosynthetic process; plastid; transferase activity, transferring glycosyl groups; endosome; response to stress; nucleus
OG_9831	AT4G35790.2	GO:0008150; GO:0000003; GO:0009790; GO:0006950; GO:0048856; GO:0003674; GO:0030234; GO:0002376; GO:0040007; GO:0005575; GO:0005840; GO:0005829; GO:0009536; GO:0005886; GO:0006605; GO:0005794; GO:0005739; GO:0007165; GO:0009056; GO:0006629; GO:0016023; GO:0005773; GO:0043167; GO:0008289; GO:0016192; GO:0061024; GO:0005634; GO:0008219; GO:0044281; GO:0034641	biological_process; reproduction; embryo development; response to stress; anatomical structure development; molecular_function; enzyme regulator activity; immune system process; growth; cellular_component; ribosome; cytosol; plastid; plasma membrane; protein targeting; Golgi apparatus; mitochondrion; signal transduction; catabolic process; lipid metabolic process; cytoplasmic membrane-bounded ves…
OG_9836	AT1G75530.1	GO:0000003; GO:0030154; GO:0048856; GO:0006259; GO:0005773; GO:0051276; GO:0034641; GO:0009058; GO:0008150; GO:0005634; GO:0009790; GO:0003674	reproduction; cell differentiation; anatomical structure development; DNA metabolic process; vacuole; chromosome organization; cellular nitrogen compound metabolic process; biosynthetic process; biological_process; nucleus; embryo development; molecular_function
OG_9845	AT1G58290.1	GO:0006950; GO:0034641; GO:0009058; GO:0051186; GO:0016491; GO:0008150; GO:0042592; GO:0003674; GO:0009536	response to stress; cellular nitrogen compound metabolic process; biosynthetic process; cofactor metabolic process; oxidoreductase activity; biological_process; homeostatic process; molecular_function; plastid
OG_9857	AT1G09815.1	GO:0016779; GO:0006259; GO:0009058; GO:0005634; GO:0005622; GO:0043234	nucleotidyltransferase activity; DNA metabolic process; biosynthetic process; nucleus; intracellular; protein complex
OG_9860	AT4G31740.1	GO:0005794; GO:0005777; GO:0008565; GO:0008150; GO:0006810; GO:0005829; GO:0016192	Golgi apparatus; peroxisome; protein transporter activity; biological_process; transport; cytosol; vesicle-mediated transport
OG_9861	AT3G26420.1	GO:0008150; GO:0006810; GO:0003674; GO:0006950; GO:0006913; GO:0001071; GO:0048856; GO:0016301; GO:0009058; GO:0006629; GO:0005777; GO:0000003; GO:0043167; GO:0002376; GO:0008219; GO:0003677; GO:0006605; GO:0007005; GO:0009536; GO:0016491; GO:0008168; GO:0005829; GO:0005975; GO:0006091; GO:0009056; GO:0003723; GO:0003729; GO:0006259; GO:0042254; GO:0034641; GO:0005575; GO:0016853; GO:0006397; GO:…	biological_process; transport; molecular_function; response to stress; nucleocytoplasmic transport; nucleic acid binding transcription factor activity; anatomical structure development; kinase activity; biosynthetic process; lipid metabolic process; peroxisome; reproduction; ion binding; immune system process; cell death; DNA binding; protein targeting; mitochondrion organization; plastid; oxidor…
OG_9864	AT2G22570.1	GO:0005737; GO:0016810; GO:0044281; GO:0034641; GO:0009058; GO:0051186; GO:0008150; GO:0005634	cytoplasm; hydrolase activity, acting on carbon-nitrogen (but not peptide) bonds; small molecule metabolic process; cellular nitrogen compound metabolic process; biosynthetic process; cofactor metabolic process; biological_process; nucleus
OG_9870	AT2G29690.1	GO:0006950; GO:0044281; GO:0009058; GO:0007165; GO:0006520; GO:0009056; GO:0002376; GO:0008219; GO:0006790; GO:0019748; GO:0008150; GO:0034641; GO:0016829; GO:0006810; GO:0009536; GO:0005829; GO:0005575; GO:0006091; GO:0015979; GO:0006605; GO:0061024; GO:0005737; GO:0043234; GO:0000902; GO:0040007; GO:0016779; GO:0048646; GO:0000003; GO:0048856	response to stress; small molecule metabolic process; biosynthetic process; signal transduction; cellular amino acid metabolic process; catabolic process; immune system process; cell death; sulfur compound metabolic process; secondary metabolic process; biological_process; cellular nitrogen compound metabolic process; lyase activity; transport; plastid; cytosol; cellular_component; generation of …
OG_9871	AT5G23290.1	GO:0006457; GO:0043234; GO:0051082	protein folding; protein complex; unfolded protein binding
OG_9889	AT1G49975.1	GO:0009536; GO:0009579; GO:0043234; GO:0003674; GO:0015979	plastid; thylakoid; protein complex; molecular_function; photosynthesis
OG_9892	AT1G63410.1	GO:0008150; GO:0003674; GO:0005737	biological_process; molecular_function; cytoplasm
OG_9903	AT5G35360.1	GO:0009536; GO:0006950; GO:0009058; GO:0044281; GO:0006629; GO:0019748; GO:0016874; GO:0006520; GO:0009056; GO:0040007; GO:0005840; GO:0005829; GO:0043473; GO:0021700; GO:0030154; GO:0048856; GO:0043167; GO:0006790; GO:0051186; GO:0005975; GO:0000902; GO:0008150; GO:0071554; GO:0005739; GO:0005737; GO:0043234	plastid; response to stress; biosynthetic process; small molecule metabolic process; lipid metabolic process; secondary metabolic process; ligase activity; cellular amino acid metabolic process; catabolic process; growth; ribosome; cytosol; pigmentation; developmental maturation; cell differentiation; anatomical structure development; ion binding; sulfur compound metabolic process; cofactor metab…
OG_9904	AT3G10700.1	GO:0005975; GO:0044281; GO:0043167; GO:0016301; GO:0005829; GO:0034641	carbohydrate metabolic process; small molecule metabolic process; ion binding; kinase activity; cytosol; cellular nitrogen compound metabolic process
OG_9906	AT4G29530.1	GO:0016791; GO:0007165; GO:0008233; GO:0009058; GO:0006629; GO:0006461; GO:0003674; GO:0034641; GO:0006950; GO:0005634; GO:0005886; GO:0006091; GO:0044281	phosphatase activity; signal transduction; peptidase activity; biosynthetic process; lipid metabolic process; protein complex assembly; molecular_function; cellular nitrogen compound metabolic process; response to stress; nucleus; plasma membrane; generation of precursor metabolites and energy; small molecule metabolic process
OG_9908	AT4G29120.1	GO:0008150; GO:0009536; GO:0005829; GO:0005739; GO:0003674; GO:0034641; GO:0005975; GO:0009056; GO:0044281; GO:0051186; GO:0016491	biological_process; plastid; cytosol; mitochondrion; molecular_function; cellular nitrogen compound metabolic process; carbohydrate metabolic process; catabolic process; small molecule metabolic process; cofactor metabolic process; oxidoreductase activity
OG_9909	AT2G19870.1	GO:0003723; GO:0009536; GO:0008168; GO:0034641	RNA binding; plastid; methyltransferase activity; cellular nitrogen compound metabolic process
OG_9911	AT5G51130.1	GO:0008150; GO:0006464; GO:0034641; GO:0009058; GO:0005737; GO:0051276; GO:0008168	biological_process; cellular protein modification process; cellular nitrogen compound metabolic process; biosynthetic process; cytoplasm; chromosome organization; methyltransferase activity
OG_9913	AT4G29080.1	GO:0001071; GO:0034641; GO:0009058; GO:0006950; GO:0044281; GO:0006629; GO:0000003; GO:0048856; GO:0008150; GO:0005794; GO:0030154; GO:0040007; GO:0009790; GO:0005575; GO:0016791; GO:0007165; GO:0003674; GO:0005739; GO:0003677; GO:0005975; GO:0006412; GO:0005623; GO:0005634; GO:0048646; GO:0009536; GO:0005768; GO:0005576; GO:0043234; GO:0005622; GO:0006464	nucleic acid binding transcription factor activity; cellular nitrogen compound metabolic process; biosynthetic process; response to stress; small molecule metabolic process; lipid metabolic process; reproduction; anatomical structure development; biological_process; Golgi apparatus; cell differentiation; growth; embryo development; cellular_component; phosphatase activity; signal transduction; mo…
OG_9916	AT5G13200.1	GO:0030154; GO:0048856; GO:0005829; GO:0006810; GO:0043226; GO:0005622; GO:0006950; GO:0051276; GO:0006464; GO:0051301; GO:0003674; GO:0021700	cell differentiation; anatomical structure development; cytosol; transport; organelle; intracellular; response to stress; chromosome organization; cellular protein modification process; cell division; molecular_function; developmental maturation
OG_9919	AT2G20930.1	GO:0005737; GO:0016192	cytoplasm; vesicle-mediated transport
OG_9922	AT4G19860.1	GO:0005829; GO:0016746; GO:0003674; GO:0009056; GO:0006629; GO:0061024; GO:0016192; GO:0009058	cytosol; transferase activity, transferring acyl groups; molecular_function; catabolic process; lipid metabolic process; membrane organization; vesicle-mediated transport; biosynthetic process
OG_9923	AT3G03330.1	GO:0009056; GO:0044281; GO:0006629; GO:0009058; GO:0006605; GO:0055085; GO:0016491; GO:0005576; GO:0008150; GO:0005783; GO:0005886	catabolic process; small molecule metabolic process; lipid metabolic process; biosynthetic process; protein targeting; transmembrane transport; oxidoreductase activity; extracellular region; biological_process; endoplasmic reticulum; plasma membrane
OG_9926	AT5G36230.1	GO:0005975; GO:0009056; GO:0008135; GO:0005829; GO:0006412; GO:0005575; GO:0005634; GO:0005840; GO:0003674	carbohydrate metabolic process; catabolic process; translation factor activity, nucleic acid binding; cytosol; translation; cellular_component; nucleus; ribosome; molecular_function
OG_9927	AT5G16520.1	GO:0005739; GO:0006605; GO:0055085; GO:0009056; GO:0044281; GO:0006629	mitochondrion; protein targeting; transmembrane transport; catabolic process; small molecule metabolic process; lipid metabolic process
OG_9928	AT1G31800.1	GO:0048856; GO:0009536; GO:0009058; GO:0006629; GO:0044281; GO:0008150; GO:0016491; GO:0005975; GO:0034641; GO:0051186; GO:0003674; GO:0030154; GO:0043167	anatomical structure development; plastid; biosynthetic process; lipid metabolic process; small molecule metabolic process; biological_process; oxidoreductase activity; carbohydrate metabolic process; cellular nitrogen compound metabolic process; cofactor metabolic process; molecular_function; cell differentiation; ion binding
OG_9929	AT3G53130.1	GO:0048856; GO:0009536; GO:0009058; GO:0006629; GO:0044281; GO:0008150; GO:0016491; GO:0005975; GO:0034641; GO:0051186; GO:0003674; GO:0030154; GO:0043167	anatomical structure development; plastid; biosynthetic process; lipid metabolic process; small molecule metabolic process; biological_process; oxidoreductase activity; carbohydrate metabolic process; cellular nitrogen compound metabolic process; cofactor metabolic process; molecular_function; cell differentiation; ion binding
OG_9930	AT4G01250.1	GO:0005773; GO:0008150; GO:0006457; GO:0000003; GO:0009790; GO:0006950; GO:0002376; GO:0007165; GO:0009058; GO:0071554; GO:0005975; GO:0006810; GO:0034641; GO:0007568; GO:0048856; GO:0008219; GO:0001071; GO:0003674; GO:0005634; GO:0044281; GO:0006629; GO:0043234; GO:0005622; GO:0003677	vacuole; biological_process; protein folding; reproduction; embryo development; response to stress; immune system process; signal transduction; biosynthetic process; cell wall organization or biogenesis; carbohydrate metabolic process; transport; cellular nitrogen compound metabolic process; aging; anatomical structure development; cell death; nucleic acid binding transcription factor activity; m…
OG_9932	AT4G01310.1	GO:0006412; GO:0003735; GO:0009058; GO:0044281; GO:0006629; GO:0009536; GO:0006790; GO:0006520; GO:0005840; GO:0005829; GO:0005575; GO:0042254	translation; structural constituent of ribosome; biosynthetic process; small molecule metabolic process; lipid metabolic process; plastid; sulfur compound metabolic process; cellular amino acid metabolic process; ribosome; cytosol; cellular_component; ribosome biogenesis
OG_9940	AT2G38840.1	GO:0043226; GO:0005622; GO:0008150; GO:0043167; GO:0003924	organelle; intracellular; biological_process; ion binding; GTPase activity
OG_9943	AT3G59690.1	GO:0048856; GO:0071554; GO:0009058; GO:0005975; GO:0005794; GO:0006790; GO:0019748; GO:0005886; GO:0006950; GO:0003674; GO:0005634	anatomical structure development; cell wall organization or biogenesis; biosynthetic process; carbohydrate metabolic process; Golgi apparatus; sulfur compound metabolic process; secondary metabolic process; plasma membrane; response to stress; molecular_function; nucleus
OG_9947	AT3G19260.1	GO:0009058; GO:0006629; GO:0016746; GO:0044281; GO:0008150; GO:0005783; GO:0005794; GO:0005886; GO:0005575	biosynthetic process; lipid metabolic process; transferase activity, transferring acyl groups; small molecule metabolic process; biological_process; endoplasmic reticulum; Golgi apparatus; plasma membrane; cellular_component
OG_9948	AT4G34050.1	GO:0034641; GO:0009056; GO:0005829; GO:0009058; GO:0019748; GO:0000003; GO:0048856; GO:0008168; GO:0006950; GO:0048646; GO:0006520; GO:0008150; GO:0006790; GO:0005783; GO:0005634; GO:0006464	cellular nitrogen compound metabolic process; catabolic process; cytosol; biosynthetic process; secondary metabolic process; reproduction; anatomical structure development; methyltransferase activity; response to stress; anatomical structure formation involved in morphogenesis; cellular amino acid metabolic process; biological_process; sulfur compound metabolic process; endoplasmic reticulum; nuc…
OG_9950	AT1G71000.1	GO:0008150; GO:0009536; GO:0006457; GO:0000003; GO:0048856; GO:0005783; GO:0048646; GO:0005829; GO:0006950; GO:0044403; GO:0002376; GO:0009579; GO:0005886; GO:0005739	biological_process; plastid; protein folding; reproduction; anatomical structure development; endoplasmic reticulum; anatomical structure formation involved in morphogenesis; cytosol; response to stress; symbiosis, encompassing mutualism through parasitism; immune system process; thylakoid; plasma membrane; mitochondrion
OG_9953	AT1G31160.1	GO:0006790; GO:0003674; GO:0005777; GO:0005886; GO:0044281; GO:0034641; GO:0009536; GO:0005829; GO:0043167; GO:0005739; GO:0019899	sulfur compound metabolic process; molecular_function; peroxisome; plasma membrane; small molecule metabolic process; cellular nitrogen compound metabolic process; plastid; cytosol; ion binding; mitochondrion; enzyme binding
OG_9955	AT1G21065.1	GO:0009536	plastid
OG_9957	AT1G10180.1	GO:0007267; GO:0034641; GO:0048856; GO:0006950; GO:0044403; GO:0002376; GO:0008150; GO:0005737; GO:0005634	cell-cell signaling; cellular nitrogen compound metabolic process; anatomical structure development; response to stress; symbiosis, encompassing mutualism through parasitism; immune system process; biological_process; cytoplasm; nucleus
OG_9958	AT2G04340.1	GO:0005739	mitochondrion
OG_9960	AT4G38260.1
OG_9961	AT2G03480.2	GO:0005773; GO:0048856; GO:0005794; GO:0008168; GO:0071554; GO:0009058; GO:0005975; GO:0008150; GO:0005768	vacuole; anatomical structure development; Golgi apparatus; methyltransferase activity; cell wall organization or biogenesis; biosynthetic process; carbohydrate metabolic process; biological_process; endosome
OG_9963	AT1G18520.1	GO:0008150; GO:0007568; GO:0005576; GO:0005794; GO:0048856; GO:0005575; GO:0005886	biological_process; aging; extracellular region; Golgi apparatus; anatomical structure development; cellular_component; plasma membrane
OG_9976	AT5G20280.1	GO:0000003; GO:0048856; GO:0008150; GO:0040007; GO:0006950; GO:0005829; GO:0005575; GO:0016757; GO:0034641; GO:0005886; GO:0048646; GO:0002376; GO:0007049; GO:0009058; GO:0006629; GO:0005634; GO:0005975	reproduction; anatomical structure development; biological_process; growth; response to stress; cytosol; cellular_component; transferase activity, transferring glycosyl groups; cellular nitrogen compound metabolic process; plasma membrane; anatomical structure formation involved in morphogenesis; immune system process; cell cycle; biosynthetic process; lipid metabolic process; nucleus; carbohydra…
OG_9983	AT4G15520.1	GO:0008168; GO:0003723; GO:0034641; GO:0006605; GO:0055085; GO:0009056; GO:0044281; GO:0006629; GO:0005737	methyltransferase activity; RNA binding; cellular nitrogen compound metabolic process; protein targeting; transmembrane transport; catabolic process; small molecule metabolic process; lipid metabolic process; cytoplasm
OG_9999	AT2G27500.1	GO:0008150; GO:0007165; GO:0005886; GO:0071554; GO:0005618; GO:0051276; GO:0006464; GO:0002376; GO:0006950; GO:0008219; GO:0006605; GO:0061024; GO:0051301; GO:0034641; GO:0009058; GO:0005576; GO:0048856; GO:0016798; GO:0005575; GO:0005783; GO:0005634; GO:0005975	biological_process; signal transduction; plasma membrane; cell wall organization or biogenesis; cell wall; chromosome organization; cellular protein modification process; immune system process; response to stress; cell death; protein targeting; membrane organization; cell division; cellular nitrogen compound metabolic process; biosynthetic process; extracellular region; anatomical structure devel…

## Sheet: Table S6
Orthologous groups in red represent ω2 or ω > 1, LRT < 0.05 and BEB >95% with positive selection sites in both M1a vs M2a and M7 vs M8.
Orthologous_Groups	Ath_Ortholog_ID	KO_ID	Pathway
OG_10001	AT5G22050.2
OG_10002	AT4G15440.1	K10528
OG_10007	AT2G41250.1
OG_10009	AT2G41640.2
OG_10010	AT4G10650.1
OG_10011	AT3G12040.1	K03652
OG_10034	AT3G08000.1
OG_10037	AT1G31240.1	K14649	ko03022 Basal transcription factors
OG_10043	AT5G43880.1
OG_10044	AT5G02540.1
OG_10057	AT2G48120.1
OG_10061	AT1G04530.1
OG_10064	AT5G47680.1	K15445
OG_10071	AT3G47000.1	K05349	ko00500 Starch and sucrose metabolism	ko00940 Phenylpropanoid biosynthesis
OG_10073	AT1G30520.1	K14760
OG_10077	AT5G44520.1	K01807	ko00710 Carbon fixation in photosynthetic organisms	ko01200 Carbon metabolism	ko01230 Biosynthesis of amino acids
OG_10082	AT1G65440.3	K11292
OG_10083	AT5G19750.1	K13348
OG_10085	AT2G41120.1
OG_10086	AT3G56820.1
OG_10087	AT5G04200.1
OG_10089	AT3G03630.1	K01738	ko00920 Sulfur metabolism	ko01200 Carbon metabolism	ko01230 Biosynthesis of amino acids
OG_10091	AT1G58030.1
OG_10094	AT1G64770.1
OG_10095	AT2G23840.1
OG_10102	AT4G02980.1
OG_10109	AT3G10340.1	K10775	ko00940 Phenylpropanoid biosynthesis
OG_10111	AT2G39190.2	K08869
OG_10112	AT2G19540.1	K14848
OG_10122	AT4G34660.1
OG_10123	AT5G46420.1
OG_10124	AT2G43840.2	K13691
OG_10132	AT4G24810.2	K08869
OG_10134	AT1G22730.1
OG_10138	AT2G19080.1	K17776
OG_10142	AT3G08600.1
OG_10144	AT2G40610.1
OG_10148	AT1G07080.1
OG_10161	AT2G26110.1
OG_10162	AT5G11840.1
OG_10163	AT1G64520.1	K03031
OG_10179	AT2G38420.1
OG_10180	AT2G38500.1
OG_10181	AT3G51610.1
OG_10183	AT1G32070.3
OG_10186	AT1G09780.1	K15633	ko00260 Glycine, serine and threonine metabolism	ko00680 Methane metabolism	ko01200 Carbon metabolism	ko01230 Biosynthesis of amino acids
OG_10194	AT5G18950.1
OG_10200	AT5G27820.1
OG_10202	AT5G11340.1
OG_10203	AT4G38370.1
OG_10207	AT3G51420.1
OG_10210	AT5G66090.1
OG_10211	AT4G35930.1
OG_10212	AT1G75900.1
OG_10215	AT5G66230.1
OG_10218	AT1G54150.1	K15688
OG_10222	AT1G72790.1
OG_10228	AT1G79730.1	K15174
OG_10230	AT1G08500.1
OG_10234	AT1G67940.1
OG_10235	AT1G18190.1
OG_10240	AT1G14810.1	K00133	ko00270 Cysteine and methionine metabolism	ko00300 Lysine biosynthesis	ko01210 2-Oxocarboxylic acid metabolism	ko01230 Biosynthesis of amino acids
OG_10242	AT1G24620.1	K13448
OG_10245	AT5G39360.1
OG_10247	AT5G15400.1	K10597	ko04141 Protein processing in endoplasmic reticulum
OG_10250	AT5G15330.1
OG_10251	AT3G28860.1	K05658
OG_10255	AT5G40020.1
OG_10261	AT5G45380.1
OG_10262	AT4G19390.1
OG_10263	AT5G45360.1
OG_10265	AT1G31790.1
OG_10275	AT1G19690.1
OG_10281	AT1G47510.1
OG_10297	AT2G43360.1	K01012
OG_10305	AT1G10330.1
OG_10311	AT3G26090.1
OG_10312	AT1G67690.1
OG_10313	AT1G27300.1
OG_10315	AT4G13870.2
OG_10316	AT5G39980.1
OG_10318	AT5G45580.1
OG_10319	AT2G35540.1
OG_10320	AT5G46910.1
OG_10321	AT5G46860.1	K08488
OG_10325	AT5G65540.1
OG_10330	AT1G79220.1	K15032
OG_10331	AT5G48460.1
OG_10339	AT5G16880.3
OG_10341	AT4G14890.1	K02639
OG_10342	AT3G22450.1	K02881
OG_10343	AT1G50030.1	K07203	ko04066 HIF-1 signaling pathway	ko04150 mTOR signaling pathway	ko04151 PI3K-Akt signaling pathway	ko04152 AMPK signaling pathway
OG_10344	AT2G14660.1
OG_10350	AT5G02830.1
OG_10358	AT5G06430.1
OG_10359	AT3G23400.1
OG_10375	AT5G05520.1	K07277
OG_10376	AT3G11090.1
OG_10377	AT3G11110.1
OG_10378	AT3G11150.1
OG_10381	AT3G47080.1
OG_10385	AT1G21770.1
OG_10386	AT1G21760.1	K10295
OG_10387	AT1G21790.1
OG_10394	AT3G13200.1	K12863
OG_10395	AT4G17370.1
OG_10399	AT5G46580.1
OG_10400	AT1G32520.1
OG_10402	AT1G16900.1	K03846	ko00513 Various types of N-glycan biosynthesis
OG_10405	AT1G16920.1	K07904
OG_10409	AT4G29010.1	K10527	ko00592 alpha-Linolenic acid metabolism	ko01212 Fatty acid metabolism
OG_10413	AT1G49050.1
OG_10428	AT3G51270.1	K07179
OG_10440	AT1G79870.1	K15919	ko00630 Glyoxylate and dicarboxylate metabolism
OG_10442	AT2G38440.1
OG_10444	AT1G04390.1
OG_10448	AT2G26260.1	K07748
OG_10449	AT1G06110.1	K10290
OG_10459	AT3G09210.1
OG_10462	AT3G12685.1
OG_10467	AT2G43110.1
OG_10477	AT2G32280.1
OG_10479	AT3G21870.1
OG_10484	AT5G58920.1
OG_10487	AT2G18410.1
OG_10495	AT5G60590.2
OG_10497	AT1G07970.1
OG_10498	AT2G27800.1
OG_10499	AT2G28510.1
OG_10503	AT5G14180.1
OG_10505	AT5G14210.1
OG_10518	AT2G40600.1
OG_10519	AT1G58350.3
OG_10524	AT1G64080.1
OG_10525	AT1G64380.1
OG_10529	AT1G71500.1
OG_10530	AT4G25340.1	K14826
OG_10532	AT2G01590.1
OG_10537	AT1G06530.1
OG_10538	AT5G16550.1
OG_10539	AT4G02485.1
OG_10546	AT3G47610.1
OG_10550	AT3G22990.1
OG_10551	AT5G43750.1
OG_10558	AT2G29660.1
OG_10563	AT3G02700.1
OG_10564	AT2G27100.1
OG_10576	AT4G20310.2	K07765
OG_10585	AT1G12244.1	K07447
OG_10586	AT1G17330.1	K06950
OG_10594	AT5G56740.1	K11303
OG_10598	AT1G11890.1	K08517
OG_10600	AT3G46780.1
OG_10601	AT5G47580.1
OG_10602	AT4G16510.1
OG_10618	AT4G08685.1
OG_10623	AT1G07645.1
OG_10630	AT5G55130.2	K11996
OG_10631	AT3G20420.1
OG_10639	AT4G12970.1
OG_10644	AT2G37000.1
OG_10648	AT3G60300.1	K10640
OG_10652	AT5G58440.1
OG_10668	AT1G80920.1
OG_10671	AT1G27050.1
OG_10672	AT1G10380.1
OG_10673	AT2G46710.1
OG_10677	AT3G13235.3	K11885
OG_10684	AT1G04985.1
OG_10685	AT5G35670.1
OG_10688	AT2G38730.1	K09567
OG_10689	AT3G01800.1	K02838
OG_10690	AT3G17660.1	K12486
OG_10695	AT3G18165.1	K12861
OG_10702	AT5G58130.1
OG_10704	AT1G15440.2	K14558
OG_10705	AT1G26340.1
OG_10714	AT4G24090.1
OG_10716	AT1G26940.1
OG_10730	AT1G11680.1	K05917
OG_10731	AT1G12790.1
OG_10735	AT4G28210.1
OG_10738	AT3G07800.1	K00857	ko00983 Drug metabolism - other enzymes
OG_10744	AT2G38120.1	K13946	ko04075 Plant hormone signal transduction
OG_10746	AT1G74120.1
OG_10750	AT3G53970.1	K06700
OG_10751	AT3G54000.1
OG_10752	AT4G21520.1
OG_10753	AT3G56840.1
OG_10756	AT2G31040.1	K02116
OG_10757	AT2G42620.1
OG_10760	AT5G08540.1
OG_10761	AT1G50370.1	K15498
OG_10764	AT1G24095.1
OG_10765	AT1G24030.1
OG_10766	AT1G02260.1
OG_10770	AT3G10030.1
OG_10776	AT4G09750.1
OG_10778	AT1G60000.1
OG_10779	AT1G67570.1
OG_10789	AT5G40950.1	K02899
OG_10793	AT5G02310.1
OG_10799	AT1G04555.1
OG_10801	AT3G14750.1
OG_10802	AT2G44420.1	K14662
OG_10806	AT1G13330.1
OG_10810	AT3G55070.2	K18624
OG_10813	AT5G12320.1
OG_10815	AT3G13450.1	K00167
OG_10817	AT5G55500.1	K03714
OG_10819	AT1G71950.1
OG_10820	AT3G63510.1	K05539
OG_10829	AT3G29010.1
OG_10831	AT2G34620.1	K15032
OG_10838	AT4G23890.1
OG_10839	AT3G08490.1
OG_10840	AT5G13720.1
OG_10841	AT4G00050.1
OG_10844	AT1G15980.1
OG_10851	AT3G08550.1
OG_10852	AT4G31560.1
OG_10870	ATCG00790.1	K02878
OG_10872	AT5G13970.1
OG_10873	AT3G26760.1
OG_10874	AT5G25752.1
OG_10882	AT2G23470.1
OG_10889	AT2G25720.1
OG_10899	AT1G18440.1	K01056
OG_10900	AT1G73920.2
OG_10914	AT1G27430.1
OG_10915	AT3G09430.1
OG_10916	AT5G60840.1
OG_10924	AT5G20140.2
OG_10927	AT5G06170.1	K15378
OG_10929	AT5G13410.1
OG_10935	AT5G64250.1
OG_10941	AT1G18335.1
OG_8076	AT3G11830.1	K09499
OG_8227	AT5G14850.2	K05286
OG_8934	AT3G17820.1	K01915	ko00330 Arginine and proline metabolism	ko00630 Glyoxylate and dicarboxylate metabolism	ko00910 Nitrogen metabolism	ko01230 Biosynthesis of amino acids	ko02020 Two-component system
OG_9045	AT2G21960.1
OG_9046	AT1G56180.1
OG_9107	AT1G20930.1	K07760
OG_9360	AT1G09800.1	K06173
OG_9363	AT1G60870.1
OG_9371	AT5G09730.1	K15920	ko00520 Amino sugar and nucleotide sugar metabolism
OG_9381	AT2G04305.1
OG_9383	AT3G25660.1	K02433
OG_9384	AT5G64510.1
OG_9385	AT2G14260.2	K01259
OG_9387	AT4G03270.1	K18812
OG_9392	AT4G04955.1	K01466
OG_9397	AT1G28510.1
OG_9398	AT1G28690.1
OG_9404	AT3G62540.1
OG_9406	AT1G29800.2
OG_9409	AT5G46550.1
OG_9410	AT2G25950.1
OG_9411	AT2G34640.1
OG_9412	AT3G25210.1
OG_9420	AT1G49470.1
OG_9426	AT4G04180.1
OG_9428	AT4G22340.1	K00981	ko04070 Phosphatidylinositol signaling system
OG_9431	AT5G03455.1	K18065
OG_9437	AT5G03870.1
OG_9447	AT4G03140.1
OG_9449	AT1G02970.1	K06632
OG_9450	AT2G47770.1
OG_9451	AT4G02440.1
OG_9452	AT1G02700.1
OG_9454	AT2G47390.1
OG_9456	AT4G01940.1
OG_9458	AT3G62190.1
OG_9460	AT4G01720.1
OG_9461	AT3G62030.3	K03768
OG_9467	AT3G63140.1
OG_9471	AT3G05345.1
OG_9474	AT1G08960.1
OG_9477	AT5G27290.1
OG_9478	AT3G04970.2
OG_9479	AT3G04950.1
OG_9482	AT1G54520.1
OG_9495	AT2G46735.1
OG_9498	AT1G01630.1
OG_9506	AT5G05810.1
OG_9508	AT5G44250.1
OG_9511	AT3G46630.1
OG_9513	AT5G65860.2	K18477
OG_9514	AT4G37630.2	K18811
OG_9519	AT2G43420.1
OG_9520	AT5G10730.1
OG_9524	AT5G15450.1	K03695
OG_9525	AT5G11000.1
OG_9528	AT5G11270.1
OG_9529	AT5G11280.1
OG_9536	AT4G31340.1
OG_9541	AT5G11650.1
OG_9544	AT3G51320.1
OG_9545	AT1G75850.1
OG_9549	AT4G38630.1	K03029
OG_9559	AT2G18350.1
OG_9562	AT3G50685.1
OG_9565	AT5G66631.1
OG_9566	AT4G37130.1	K14307
OG_9570	AT3G19420.1	K01110	ko04068 FoxO signaling pathway	ko04070 Phosphatidylinositol signaling system	ko04115 p53 signaling pathway	ko04150 mTOR signaling pathway	ko04151 PI3K-Akt signaling pathway	ko04510 Focal adhesion	ko04530 Tight junction
OG_9574	AT1G64960.1	K11492
OG_9579	AT2G22790.1
OG_9580	AT1G60780.1	K12393
OG_9582	AT1G32440.1	K00873	ko00230 Purine metabolism	ko00620 Pyruvate metabolism	ko01200 Carbon metabolism	ko01230 Biosynthesis of amino acids
OG_9588	AT5G41150.2	K10848	ko03460 Fanconi anemia pathway
OG_9589	AT5G13960.1	K11420	ko00310 Lysine degradation
OG_9590	AT4G17540.1
OG_9592	AT4G16760.1	K00232	ko00592 alpha-Linolenic acid metabolism	ko01040 Biosynthesis of unsaturated fatty acids	ko01212 Fatty acid metabolism	ko03320 PPAR signaling pathway	ko04024 cAMP signaling pathway	ko04146 Peroxisome
OG_9594	AT4G12060.1
OG_9595	AT4G11650.1
OG_9612	AT1G04580.1
OG_9615	AT5G12940.1
OG_9623	AT1G54280.1	K01530
OG_9627	AT3G13780.1
OG_9631	AT4G29220.1	K00850	ko00030 Pentose phosphate pathway	ko00051 Fructose and mannose metabolism	ko00052 Galactose metabolism	ko00680 Methane metabolism	ko01200 Carbon metabolism	ko01230 Biosynthesis of amino acids	ko03018 RNA degradation	ko04152 AMPK signaling pathway
OG_9639	AT3G57350.1	K14309
OG_9640	AT1G52590.1
OG_9646	AT4G15910.1
OG_9650	AT3G16990.1
OG_9651	AT4G03430.1	K12855
OG_9653	AT4G16130.1	K12446
OG_9657	AT5G20850.1	K04482	ko03460 Fanconi anemia pathway
OG_9660	AT3G17210.1
OG_9667	AT4G29890.1
OG_9672	AT5G57460.1
OG_9675	AT5G57660.1
OG_9676	AT1G07200.2
OG_9678	AT4G30840.1
OG_9679	AT2G39440.1	K10745
OG_9681	AT5G13510.1	K02864
OG_9685	AT4G04670.1	K15450
OG_9689	AT4G03960.1	K18045
OG_9690	AT4G05530.1	K11147	ko04146 Peroxisome
OG_9697	AT3G62580.1
OG_9703	AT3G09410.1
OG_9704	AT5G03560.2	K03457
OG_9707	AT1G56345.1
OG_9709	AT5G27030.1
OG_9713	AT5G27395.2	K17426
OG_9715	AT5G27330.1
OG_9736	AT5G53540.1
OG_9737	AT5G54180.1
OG_9744	AT2G22010.1	K12169
OG_9745	AT4G39520.1
OG_9753	AT4G33460.1
OG_9759	AT4G32915.1	K02435
OG_9761	AT4G10110.1	K12831
OG_9764	AT1G76850.1	K17637
OG_9773	AT1G21090.1
OG_9776	AT5G52880.1
OG_9779	AT4G25570.1
OG_9781	AT2G17265.1	K00872	ko01230 Biosynthesis of amino acids
OG_9787	AT5G51880.1
OG_9789	AT5G51700.1	K13458
OG_9798	AT2G42490.1	K00276	ko00350 Tyrosine metabolism	ko00360 Phenylalanine metabolism	ko00410 beta-Alanine metabolism	ko00950 Isoquinoline alkaloid biosynthesis	ko00960 Tropane, piperidine and pyridine alkaloid biosynthesis
OG_9804	AT3G08940.2	K08915
OG_9805	AT5G22800.1	K01872	ko00970 Aminoacyl-tRNA biosynthesis
OG_9807	AT5G17670.1
OG_9808	AT3G48730.1	K01845
OG_9811	AT2G20980.1	K10736
OG_9812	AT2G16630.1
OG_9813	AT4G34730.1	K02834
OG_9819	AT4G34460.3	K04536	ko04062 Chemokine signaling pathway	ko04151 PI3K-Akt signaling pathway
OG_9822	AT1G20670.1	K11723
OG_9825	AT4G38390.1
OG_9831	AT4G35790.2	K01115	ko00565 Ether lipid metabolism	ko04014 Ras signaling pathway	ko04024 cAMP signaling pathway	ko04144 Endocytosis
OG_9836	AT1G75530.1
OG_9845	AT1G58290.1	K02492
OG_9857	AT1G09815.1	K03505	ko00240 Pyrimidine metabolism	ko03030 DNA replication	ko03410 Base excision repair	ko03420 Nucleotide excision repair	ko03430 Mismatch repair	ko03440 Homologous recombination
OG_9860	AT4G31740.1
OG_9861	AT3G26420.1	K12885
OG_9864	AT2G22570.1
OG_9870	AT2G29690.1	K01657	ko01230 Biosynthesis of amino acids
OG_9871	AT5G23290.1	K04797
OG_9889	AT1G49975.1
OG_9892	AT1G63410.1
OG_9903	AT5G35360.1	K01961	ko00253 Tetracycline biosynthesis	ko00620 Pyruvate metabolism	ko00640 Propanoate metabolism	ko00720 Carbon fixation pathways in prokaryotes	ko01200 Carbon metabolism	ko01212 Fatty acid metabolism
OG_9904	AT3G10700.1	K18677
OG_9906	AT4G29530.1	K13248
OG_9908	AT4G29120.1
OG_9909	AT2G19870.1	K15507
OG_9911	AT5G51130.1	K15190
OG_9913	AT4G29080.1	K14484
OG_9916	AT5G13200.1
OG_9919	AT2G20930.1
OG_9922	AT4G19860.1
OG_9923	AT3G03330.1
OG_9926	AT5G36230.1
OG_9927	AT5G16520.1
OG_9928	AT1G31800.1	K15747
OG_9929	AT3G53130.1	K09837
OG_9930	AT4G01250.1	K13425
OG_9932	AT4G01310.1	K02931
OG_9940	AT2G38840.1
OG_9943	AT3G59690.1
OG_9947	AT3G19260.1
OG_9948	AT4G34050.1	K00588	ko00940 Phenylpropanoid biosynthesis	ko00941 Flavonoid biosynthesis	ko00945 Stilbenoid, diarylheptanoid and gingerol biosynthesis
OG_9950	AT1G71000.1
OG_9953	AT1G31160.1
OG_9955	AT1G21065.1
OG_9957	AT1G10180.1
OG_9958	AT2G04340.1
OG_9960	AT4G38260.1
OG_9961	AT2G03480.2
OG_9963	AT1G18520.1
OG_9976	AT5G20280.1	K00696
OG_9983	AT4G15520.1
OG_9999	AT2G27500.1
